# Supplementary material for: 'We pledge to improve the health of our entire community': Improving health worker motivation and performance in Bihar, India through teamwork, recognition, and non-financial incentives
Source: PLoS One. 2018 Aug 30;13(8):e0203265. doi: 10.1371/journal.pone.0203265 (PMC6117047; doi:10.1371/journal.pone.0203265)
Supplement: S1 Data — (XLSX) [file pone.0203265.s003.xlsx]

## Sheet: data
QA5	QA6	Age	Q105	Q106	Q108	Q110_YEAR	Q115	Q116	Q117	Q118	Q119	Q120	Q121	Q122	Q123	Q124	Q125	Q126	Q127	Q128	Q129	Q130	Q131	Q132	Q133	Q134	Q135	Q136	Q137	Q138	Q139	Q140	Q141	Q142	Q143	Q144	Q145	Q146	Q147	Q148	Q149	Q150	Q151	Q152	Q153	Q154	Q155	Q156	Q157
1	1	33	1	1	12	11	4	4	2	3	4	4	4	4	4	3	4	4	3	3	4	4	4	3	4	4	3	4	4	4	4	4	4	4	4	3	4	4	4	4	1	4	2	1	4	4	3	2	1
1	2	44	4	1	15	6	4	4	1	1	4	4	4	4	4	4	4	4	4	4	4	4	4	1	4	4	4	4	3	4	4	4	4	4	4	1	1	4	1	4	1	4	4	2	1	4	4	2	1
1	2	44	1	1	12	8	4	4	3	4	3	4	4	4	4	3	3	4	3	3	4	4	4	4	4	4	3	4	2	4	4	4	4	4	3	3	3	3	3	3	1	1	2	1	4	4	4	4	1
1	2	35	4	1	12	5	4	4	2	1	4	4	4	4	4	4	4	4	4	4	4	4	4	1	4	4	4	4	2	4	4	4	4	4	4	1	4	4	1	4	2	4	2	2	2	4	4	4	1
1	2	38	4	1	12	7	4	4	2	2	4	4	4	4	3	3	4	4	4	3	4	4	4	2	4	4	4	4	2	4	4	4	4	3	4	2	3	4	3	3	1	3	2	2	2	3	4	3	1
1	2	42	4	1	15	8	4	4	1	1	4	4	4	4	4	4	4	4	4	4	4	3	4	1	4	4	4	4	3	4	4	4	4	4	4	4	2	4	1	4	1	4	4	1	1	2	4	5	1
1	2	41	4	1	12	5	4	4	1	1	4	4	4	4	4	4	4	4	4	4	4	4	4	1	4	4	4	4	3	4	4	4	4	4	4	1	3	3	1	4	1	4	3	1	1	3	4	4	1
1	1	56	4	1	10	20	4	4	1	1	4	4	4	4	4	4	4	4	4	4	4	4	4	1	4	4	2	4	2	4	4	4	4	4	4	4	1	4	1	4	3	3	4	1	2	5	4	3	1
1	2	35	4	1	12	8	4	4	1	1	4	4	4	4	4	4	4	4	4	4	4	2	4	1	4	4	4	4	3	4	4	4	4	4	4	1	1	4	1	4	1	4	4	2	5	5	4	5	1
1	1	43	4	1	15	7	4	4	1	1	4	4	4	4	4	4	4	4	3	3	4	3	4	1	4	4	4	4	3	4	4	4	4	4	4	4	1	4	1	4	1	3	4	2	2	4	3	3	1
1	2	45	1	1	10	5	4	4	1	1	4	4	4	4	4	4	4	4	4	4	4	4	4	1	4	4	4	4	3	4	4	4	4	4	4	1	1	4	1	4	1	4	4	2	2	3	4	4	1
1	2	35	1	1	10	3	4	4	1	1	4	4	4	4	4	4	4	3	3	3	3	2	4	1	4	4	4	4	3	4	4	4	4	4	4	4	2	4	1	4	1	3	4	1	1	2	4	5	1
1	2	39	3	1	12	8	4	4	1	1	4	4	4	4	4	4	4	4	4	4	4	4	4	1	4	4	4	4	2	4	4	4	4	4	4	1	1	4	4	4	1	4	4	1	2	2	4	5	1
1	2	37	3	1	15	8	4	4	1	3	4	4	4	4	4	4	4	4	4	4	4	4	4	1	4	4	4	4	3	4	1	4	4	4	4	1	1	4	1	4	1	4	4	1	1	5	4	4	1
1	1	36	2	1	12	2	4	4	3	1	4	4	4	4	4	4	4	4	4	4	4	2	3	1	4	4	4	4	2	4	4	4	4	4	4	1	1	4	1	4	2	4	4	2	2	3	4	5	1
1	1	24	1	1	12	6	4	4	1	1	4	4	4	4	4	4	4	4	4	4	4	4	4	1	4	4	4	4	3	4	4	4	4	4	4	4	1	4	1	4	1	4	4	2	2	3	4	3	1
1	2	41	3	1	10	3	4	4	1	1	4	4	4	4	4	4	4	3	3	3	4	4	4	1	4	4	4	4	3	4	4	4	4	4	4	1	1	4	1	4	1	4	4	2	2	3	4	4	1
1	1	32	1	1	12	6	4	4	1	1	4	4	4	4	4	4	4	4	4	4	4	4	4	1	4	4	4	4	3	4	4	4	4	4	4	1	1	4	1	4	1	4	4	1	4	4	4	3	1
1	1	51	1	1	10	32	4	4	1	1	4	4	4	4	4	4	3	3	3	3	4	4	4	1	4	4	4	4	3	4	4	4	4	4	4	1	1	4	1	4	1	4	4	1	2	2	3	3	1
1	2	35	3	1	8	5	4	4	1	1	4	4	4	4	4	4	4	4	4	4	4	4	4	1	4	4	4	4	2	4	4	4	4	4	4	3	1	4	1	4	1	4	4	1	3	5	4	5	1
1	1	32	3	1	12	7	4	4	1	1	1	4	3	3	4	4	3	3	3	3	4	4	2	2	4	3	4	4	1	4	4	4	4	4	4	1	1	4	3	4	1	4	4	2	2	4	4	2	1
1	2	29	1	1	12	8	4	4	1	1	4	4	4	4	4	4	4	3	3	3	4	1	4	1	4	4	4	4	2	4	4	4	4	4	4	1	1	4	4	4	1	4	4	1	1	4	4	1	1
1	2	55	1	2	10	32	4	4	1	1	4	4	4	2	3	4	4	1	1	1	4	4	4	1	4	4	4	4	2	4	4	4	4	4	4	1	1	4	1	4	1	4	4	2	2	4	4	1	1
1	2	25	3	1	12	5	4	4	3	3	4	4	3	4	4	3	3	4	3	3	4	4	4	1	4	4	4	4	2	4	4	4	4	4	4	3	2	4	1	4	3	3	4	2	2	2	3	5	1
1	1	40	3	1	12	16	4	4	1	1	4	4	4	4	4	4	4	4	4	4	4	1	4	4	4	4	4	4	3	4	4	4	4	4	4	1	1	4	1	4	1	4	4	1	2	4	4	2	1
1	1	45	1	1	10	31	4	4	1	1	4	4	4	4	4	4	4	3	3	4	4	4	4	1	4	4	1	4	2	4	4	4	4	4	4	1	3	4	4	4	1	4	4	2	2	2	4	4	1
1	2	35	2	1	10	4	4	4	1	1	4	4	4	4	4	4	3	2	3	3	3	3	4	1	4	4	3	4	3	4	4	4	4	4	4	1	1	4	3	4	1	4	4	2	1	3	4	4	1
1	2	37	3	1	15	7	4	4	1	1	4	4	4	4	4	4	3	3	4	3	4	4	4	1	4	3	4	4	2	4	4	4	4	4	4	1	2	4	3	4	1	4	4	2	2	2	4	4	1
1	1	39	4	1	12	7	4	4	2	2	2	4	4	4	4	4	3	4	3	4	4	4	4	2	4	3	4	4	3	4	4	4	4	4	4	4	3	4	3	4	2	4	4	1	1	2	4	2	1
1	2	44	1	1	12	8	4	4	2	2	4	4	4	4	4	4	4	4	4	4	4	4	4	2	4	4	4	4	4	4	4	4	4	4	4	3	2	4	2	4	2	4	4	1	1	1	4	4	1
1	1	39	4	1	12	4	4	4	2	3	3	3	4	3	4	3	4	4	2	3	3	4	4	2	4	3	3	4	2	4	4	3	4	3	3	2	2	4	2	3	1	4	2	2	2	4	4	5	1
1	2	37	4	1	12	2	4	4	1	2	4	4	3	4	3	4	4	2	3	3	4	4	4	3	4	4	4	4	2	4	4	3	3	4	4	2	3	4	3	4	1	4	2	1	1	2	4	3	1
1	1	36	3	1	10	9	4	4	2	2	4	4	4	4	4	4	4	3	3	3	4	4	4	2	4	4	2	4	2	4	4	4	4	4	4	3	2	4	2	4	1	4	2	1	2	2	4	4	1
1	2	45	4	1	10	5	4	4	2	2	4	4	4	3	3	4	4	4	4	4	4	4	3	2	4	4	3	3	2	3	3	3	4	3	3	3	3	4	2	4	1	1	3	1	1	4	4	3	1
1	1	37	3	1	15	4	4	4	1	2	4	4	4	4	4	4	4	4	4	4	4	4	4	1	4	4	4	4	2	4	4	4	4	4	4	2	3	4	2	4	1	4	2	1	3	2	4	4	1
1	2	50	4	1	10	8	4	4	2	2	4	4	4	4	4	4	4	4	4	4	4	4	4	1	4	4	4	4	2	4	4	4	4	4	4	2	2	4	2	4	1	3	4	1	1	1	4	3	1
1	2	39	4	4	15	8	4	4	2	2	4	4	4	4	4	4	4	4	4	3	4	3	3	2	4	4	4	4	1	4	4	4	4	4	4	3	1	4	4	4	1	4	4	1	1	2	4	4	1
1	1	54	4	1	7	30	4	4	2	2	3	4	4	4	4	4	3	4	3	4	4	4	3	2	3	2	3	3	2	4	3	4	4	4	4	3	2	4	2	4	1	4	3	1	1	2	4	4	1
1	1	29	3	1	12	7	4	4	2	2	4	4	4	4	4	4	4	3	4	4	4	4	4	2	4	4	4	4	2	4	4	3	4	4	3	3	2	4	3	4	1	4	1	2	3	3	4	2	1
1	2	30	1	1	8	8	4	4	3	2	4	4	4	4	4	3	4	3	3	4	4	4	4	2	4	4	4	4	2	4	4	4	4	4	4	2	3	4	3	4	1	2	4	2	3	3	4	5	1
1	1	53	4	1	15	10	3	4	2	2	3	4	4	3	4	4	3	4	3	3	4	2	3	2	4	3	2	3	2	4	4	4	4	4	4	3	2	4	3	3	1	4	3	1	2	3	4	2	1
1	1	50	4	1	10	29	3	4	2	2	4	4	4	4	4	4	4	4	4	4	4	4	3	2	4	4	4	4	2	4	4	4	4	4	4	2	2	4	3	4	1	4	4	1	1	1	4	4	1
1	2	41	1	1	10	8	3	4	2	2	4	3	4	4	4	3	4	4	4	4	4	4	4	2	4	4	3	4	2	3	4	4	4	3	4	3	2	4	3	4	1	2	4	4	2	1	1	4	1
1	2	33	3	1	12	8	4	4	2	2	4	4	3	4	4	4	4	4	4	4	3	4	4	2	4	4	2	4	2	4	4	4	4	4	4	2	2	4	3	4	2	3	2	2	1	1	4	3	1
1	1	26	1	1	12	2	4	4	1	2	4	4	4	3	4	4	4	4	3	4	4	4	4	2	3	4	3	4	2	4	4	4	4	4	4	4	2	4	2	4	1	4	3	2	2	3	4	5	1
1	2	36	1	1	10	5	4	4	2	2	4	4	4	4	4	4	4	3	3	4	4	4	4	2	4	4	4	4	2	4	4	4	4	4	4	3	2	4	3	4	2	4	4	1	2	2	4	4	1
1	1	39	1	1	12	7	4	4	2	3	4	4	4	4	4	3	4	4	4	4	4	4	4	3	3	4	4	4	3	4	4	4	4	4	4	3	3	4	4	4	1	4	4	2	4	3	3	2	1
1	2	37	1	1	10	8	4	4	3	3	3	3	3	4	4	4	3	4	3	4	4	4	4	3	4	4	4	4	4	4	4	4	4	4	4	4	4	4	4	4	3	2	4	1	1	2	4	1	1
1	1	36	1	1	10	30	4	4	4	3	4	4	4	3	4	3	3	4	3	4	4	4	3	2	4	4	4	4	2	4	4	4	4	4	4	3	3	4	3	4	2	2	4	1	3	3	4	3	1
1	2	35	1	1	10	7	4	4	1	2	4	4	4	4	4	4	4	4	4	4	4	4	4	1	4	4	4	4	2	4	4	4	4	4	4	1	4	4	1	4	1	4	4	3	2	2	4	5	1
1	1	37	1	1	10	7	4	4	1	1	4	4	4	4	4	4	3	3	3	3	4	4	3	1	4	4	4	4	1	4	4	4	4	4	4	1	1	4	2	4	1	3	4	2	3	3	4	5	1
1	2	37	3	1	11	5	4	4	3	3	4	4	4	4	4	4	4	4	3	3	4	4	4	1	4	4	4	4	2	4	4	4	4	4	4	4	1	4	1	4	1	4	4	2	2	3	3	5	1
1	1	37	1	1	12	0	4	4	1	1	4	4	4	3	4	4	4	3	3	3	4	4	4	1	4	4	4	4	1	4	4	4	4	4	4	3	1	4	1	4	1	4	4	1	2	5	4	5	1
1	2	37	3	1	13	5	4	4	1	1	4	4	4	4	4	4	4	4	4	4	4	3	4	4	4	4	4	4	3	4	4	4	4	4	4	4	1	4	4	4	1	4	4	1	1	2	4	5	1
1	1	27	4	1	15	2	4	4	1	1	4	4	4	4	4	4	4	4	4	4	4	4	4	2	4	4	4	4	3	4	4	4	4	4	4	1	1	4	2	4	1	4	4	2	1	3	4	4	1
1	2	37	4	1	12	5	4	4	1	1	4	4	4	4	4	4	4	3	3	3	4	2	4	1	4	4	4	4	2	4	4	4	4	4	4	1	1	4	1	4	1	4	4	2	1	2	4	5	1
1	1	38	3	1	12	11	4	4	1	1	4	4	4	4	4	4	4	4	3	3	4	4	4	1	4	4	4	4	3	4	4	4	4	4	4	1	1	4	1	4	1	4	4	2	2	4	3	1	1
1	2	35	4	1	12	5	4	4	1	1	4	4	4	4	4	4	4	4	4	4	4	4	4	1	4	4	4	4	2	4	4	4	4	4	4	4	1	4	1	4	1	4	4	1	2	2	4	5	1
1	2	37	3	1	12	2	4	4	1	1	2	4	4	4	2	4	3	3	3	3	3	4	4	2	4	4	4	4	1	4	4	4	4	4	4	3	4	4	1	4	1	4	4	2	2	3	3	2	1
1	1	37	4	1	10	2	4	4	1	1	4	4	4	4	4	4	4	4	4	4	4	4	4	1	4	4	1	4	3	4	4	4	4	4	4	1	4	4	1	4	1	4	4	2	3	2	4	1	1
1	2	42	3	1	12	7	4	4	1	1	4	4	4	4	4	4	4	4	4	4	4	4	4	1	4	4	1	4	2	4	4	4	4	4	4	1	3	4	1	3	1	4	3	2	2	2	3	5	1
1	2	39	1	1	12	7	4	4	1	1	4	4	4	4	4	4	4	4	4	4	4	4	4	1	4	4	1	4	2	4	4	4	4	4	4	1	4	4	1	4	1	4	4	1	1	2	4	4	1
1	2	37	1	1	8	8	4	4	2	2	4	4	2	3	4	3	3	1	2	4	4	4	4	1	4	4	3	4	3	4	4	4	3	3	3	2	4	4	3	4	2	2	2	1	1	2	4	5	1
1	2	35	1	1	10	10	4	4	3	2	4	4	4	4	4	4	4	3	4	4	4	4	4	3	4	4	2	4	1	1	4	4	3	4	4	2	4	4	2	4	1	4	2	1	2	2	4	1	2
1	2	39	3	1	15	10	4	4	2	3	4	4	3	4	4	4	4	4	4	3	4	4	4	2	4	4	3	4	2	4	4	4	4	4	4	3	3	4	2	4	1	4	4	1	1	2	4	3	1
1	1	44	3	1	12	11	4	4	2	1	4	4	4	4	4	4	4	3	3	4	4	2	3	1	4	4	4	4	2	4	4	4	4	3	4	3	1	4	3	3	1	4	1	2	2	2	4	3	1
1	2	39	1	1	15	8	4	4	2	2	4	4	4	4	4	4	4	4	4	4	4	4	4	2	4	4	2	4	2	4	4	4	4	4	4	4	3	4	3	4	3	4	2	1	2	2	4	3	1
1	1	37	3	1	15	10	4	4	1	2	4	3	4	4	4	4	4	4	4	4	4	4	4	2	4	4	4	4	1	4	4	4	4	4	1	4	1	4	4	4	2	4	3	2	2	2	4	2	1
1	2	37	3	1	14	8	4	4	3	2	4	4	4	4	4	4	4	4	4	4	4	4	4	1	4	4	4	4	2	3	4	4	4	4	3	3	3	4	3	4	2	4	4	1	1	1	4	3	1
1	1	45	3	1	12	11	4	4	2	2	4	4	4	4	4	4	4	4	3	4	4	4	4	2	4	4	4	4	3	4	4	4	4	4	4	2	2	4	2	4	1	4	4	2	4	3	3	2	1
1	1	48	4	1	15	10	4	4	1	1	4	4	4	4	4	4	4	4	4	4	4	4	4	1	4	4	1	4	2	4	4	4	4	4	4	1	3	4	1	4	1	4	4	2	3	2	4	2	1
1	2	32	3	1	5	7	4	4	1	1	1	4	4	4	4	4	4	3	3	4	4	4	4	1	4	4	1	4	2	4	4	4	4	4	4	1	4	4	1	4	1	4	3	2	1	3	4	1	1
1	2	46	4	1	15	7	4	4	1	1	4	4	4	3	4	4	4	4	4	4	4	4	4	1	4	4	1	4	1	4	4	4	4	4	4	1	1	4	1	4	1	4	4	2	2	2	3	5	1
1	2	37	4	1	12	8	4	4	1	1	4	4	4	4	4	4	4	4	4	4	4	4	4	1	4	4	1	4	1	4	4	4	4	4	4	1	2	4	1	3	1	4	4	4	6	2	4	5	1
1	2	34	4	1	10	6	4	4	1	1	4	4	4	4	4	4	4	4	4	4	4	4	4	1	4	4	1	4	2	4	4	4	4	4	4	1	4	4	1	4	1	3	3	2	2	4	4	4	1
1	2	30	4	1	10	6	4	4	1	1	4	4	4	4	4	4	4	4	4	4	4	4	4	1	4	4	4	4	2	4	4	4	4	4	4	1	4	4	1	4	1	4	4	1	1	1	4	4	1
1	2	43	1	1	12	7	4	4	1	1	4	4	4	4	4	4	4	4	4	4	4	4	4	1	4	4	1	4	2	4	4	4	4	4	4	1	4	4	1	4	1	4	4	1	2	2	4	3	1
1	1	37	4	1	12	10	4	4	1	1	4	4	4	4	4	4	4	4	4	4	4	4	4	1	4	4	4	4	2	4	4	4	4	4	4	1	3	4	4	4	1	4	3	2	2	3	2	2	1
1	2	30	4	2	8	7	4	4	1	1	4	4	4	4	4	4	4	3	4	4	4	4	4	1	4	4	1	4	2	4	4	4	4	4	4	1	4	4	1	4	1	4	4	1	2	2	4	1	1
1	1	36	4	1	12	4	4	4	1	1	4	4	4	4	4	4	3	3	3	3	3	4	4	1	4	3	4	4	2	4	4	4	4	4	4	4	1	4	1	4	1	2	2	2	2	4	3	1	1
1	1	30	4	1	12	10	4	4	1	1	4	4	4	4	4	4	4	3	4	4	4	4	4	1	4	4	4	4	2	4	4	4	4	4	4	1	2	4	1	4	1	4	3	1	3	2	4	3	1
1	1	30	4	1	10	3	4	4	1	1	4	4	4	4	4	4	4	3	4	4	4	4	1	4	4	4	4	4	2	4	4	4	4	4	4	2	1	4	1	3	1	3	2	1	3	3	4	1	1
1	2	36	3	1	10	8	4	4	1	1	4	4	4	4	4	4	3	3	4	4	4	4	4	1	4	4	2	4	2	4	4	4	4	4	4	1	4	4	1	4	1	3	3	2	1	3	4	3	1
1	1	32	4	1	12	10	4	4	1	1	4	4	4	4	4	4	4	3	3	4	4	3	4	1	4	4	3	4	1	4	4	4	4	4	4	1	4	4	1	4	1	3	3	2	3	3	3	2	1
1	1	36	4	1	12	4	4	4	1	1	4	4	4	4	4	4	4	4	4	4	4	4	4	1	4	4	4	4	2	4	4	4	4	4	4	1	4	4	1	4	1	4	4	1	2	3	4	4	1
1	2	38	4	1	12	7	4	4	1	1	4	4	4	4	3	4	4	4	4	4	4	4	4	1	4	4	4	4	1	4	4	4	4	4	4	1	2	4	1	2	1	4	4	2	6	2	4	1	1
1	1	30	4	1	12	4	4	4	1	1	4	4	4	4	4	4	3	3	3	3	4	4	4	1	4	3	4	4	1	4	4	4	4	4	4	1	1	3	4	4	1	4	3	2	4	4	3	1	1
1	1	29	4	1	15	10	4	4	1	1	4	4	4	4	4	4	4	4	4	4	4	4	4	1	4	4	1	4	2	4	4	4	4	4	4	2	4	4	1	4	1	4	4	1	1	3	4	1	1
1	2	32	4	1	12	7	4	4	1	1	4	4	4	4	4	4	4	4	4	4	4	3	4	1	4	4	4	4	2	4	4	4	4	4	4	1	4	4	1	4	1	4	4	2	1	2	4	2	1
1	2	41	4	1	10	7	4	4	1	1	4	4	4	4	4	4	4	4	4	4	4	2	4	1	4	4	3	4	2	4	4	4	4	4	4	1	4	4	1	4	1	4	4	2	3	2	3	3	1
1	2	40	1	1	8	7	4	4	1	1	4	4	4	4	4	4	4	4	4	4	4	4	4	1	4	4	1	4	1	4	4	4	4	4	4	1	4	4	1	4	1	4	4	2	1	3	4	1	1
1	2	36	3	1	10	7	4	4	2	2	3	3	2	4	4	4	4	4	4	4	4	4	3	2	3	3	2	3	2	4	4	4	4	4	4	3	2	3	2	3	1	4	2	1	1	2	4	4	1
1	2	37	1	1	10	10	4	4	2	2	4	4	3	3	3	4	4	4	4	4	4	4	4	2	3	4	3	3	2	3	4	3	4	3	3	1	2	3	2	4	2	4	4	2	5	4	4	5	1
1	2	37	3	1	8	7	2	4	2	3	2	2	3	4	4	4	4	3	3	3	3	3	4	2	3	4	4	3	2	3	1	3	4	3	3	3	2	4	3	3	1	1	2	2	2	2	1	5	1
1	1	37	1	1	15	7	4	4	1	3	2	3	3	3	2	1	4	3	2	3	3	3	2	2	4	4	4	2	1	3	3	3	3	3	2	2	2	1	2	2	3	2	1	2	2	4	4	5	1
1	2	37	3	1	8	7	3	3	2	4	3	3	3	4	3	4	4	4	4	4	4	4	4	2	4	4	2	3	3	2	3	2	4	4	3	2	3	3	3	3	2	4	4	1	1	3	4	1	1
1	1	40	3	1	12	10	4	4	4	4	4	4	4	4	4	4	3	3	3	4	4	4	3	2	3	3	3	4	2	4	4	4	4	3	4	3	2	3	3	4	1	2	2	2	3	4	4	2	1
1	1	37	3	1	12	11	4	3	2	1	3	2	2	4	4	4	4	4	4	4	4	4	3	1	2	3	1	4	1	3	3	3	4	3	4	3	2	4	3	4	2	4	3	2	4	3	4	4	1
1	2	37	1	1	12	4	4	4	2	2	4	4	2	4	4	3	4	4	4	4	4	4	4	2	4	3	2	3	2	4	3	3	3	3	3	3	3	3	3	4	2	4	2	1	1	2	4	5	1
1	2	37	3	1	12	7	3	3	3	2	4	3	3	2	4	4	3	3	3	3	3	2	2	2	3	3	4	1	2	3	3	3	4	3	3	2	2	3	3	2	2	4	2	1	2	4	4	5	1
1	1	43	4	1	14	11	4	4	1	1	4	4	4	4	4	4	4	4	4	4	4	4	4	1	4	4	1	4	1	4	4	4	4	4	4	1	2	4	4	4	1	4	3	1	2	2	4	4	1
1	1	30	4	1	12	11	4	4	1	1	4	4	4	4	4	4	4	3	4	4	4	4	4	1	4	4	4	4	1	4	4	4	4	4	4	1	2	4	1	4	1	4	4	2	2	2	4	3	1
1	1	37	3	1	12	11	4	4	1	4	4	4	4	4	4	4	4	4	4	4	4	4	4	1	4	4	1	4	1	4	4	4	4	4	4	1	3	4	1	4	1	4	4	1	1	2	4	4	1
1	2	45	4	1	12	7	4	4	1	1	4	4	4	4	4	4	4	4	4	4	4	4	4	1	4	4	1	4	1	4	4	4	4	4	4	1	4	4	1	4	1	4	4	3	1	2	4	4	1
1	2	42	4	1	12	7	4	4	1	1	4	4	4	4	4	4	4	4	4	4	4	3	4	1	4	4	4	4	3	4	4	4	4	4	4	1	4	4	1	4	1	4	4	2	3	2	4	1	1
1	2	25	1	1	12	8	3	4	3	3	4	4	3	4	4	4	4	4	4	4	4	4	4	2	4	4	2	1	4	4	4	4	4	4	4	2	2	4	3	4	1	4	4	1	1	2	4	5	1
1	1	37	4	1	15	12	4	4	1	1	4	4	4	0	4	4	4	4	4	4	4	4	4	1	4	4	2	4	1	4	0	4	4	4	4	1	1	3	3	4	1	4	4	1	1	4	4	1	1
1	1	25	1	1	10	5	4	3	2	2	3	4	4	0	4	1	3	3	4	4	4	4	3	3	4	4	4	4	2	4	0	4	4	4	3	3	2	4	2	4	1	4	4	2	2	3	3	2	1
1	1	41	3	1	15	11	4	4	2	2	4	4	4	4	4	4	4	4	4	4	4	4	4	2	4	3	2	4	2	4	0	4	2	2	4	2	2	4	2	4	2	4	4	2	1	3	4	4	1
1	2	35	3	1	10	8	3	4	2	2	3	4	4	0	3	4	4	4	3	4	4	4	4	2	4	4	1	4	2	4	0	4	4	4	4	2	2	2	4	4	1	4	4	2	2	3	4	4	1
1	2	34	1	1	10	8	4	4	2	2	4	4	4	0	4	4	4	4	4	4	4	4	4	2	4	4	1	4	1	4	0	4	4	4	4	2	4	4	2	4	1	4	4	2	1	2	4	4	1
1	2	35	1	1	12	7	4	4	2	2	4	4	4	4	4	4	4	4	4	4	4	4	4	2	4	4	2	4	1	4	4	4	4	4	4	2	4	4	3	4	1	4	4	1	2	2	4	4	1
1	2	37	4	1	11	8	4	4	1	4	4	4	4	4	4	4	3	3	3	4	3	4	3	3	3	3	4	4	3	4	4	4	4	4	4	1	4	4	4	4	1	4	4	2	2	3	2	1	1
1	2	30	2	1	0	7	4	4	1	1	4	4	4	4	4	4	3	3	3	4	4	4	4	1	4	4	1	4	1	4	4	4	4	4	4	1	4	4	1	4	1	4	3	2	2	2	4	2	1
1	1	27	4	1	10	7	4	4	1	2	4	4	4	4	4	4	3	3	4	3	4	4	4	1	4	4	1	4	1	4	4	4	4	4	4	4	4	4	4	4	1	4	2	2	3	3	4	2	1
1	2	54	1	1	12	6	4	4	1	1	4	4	4	4	4	4	4	3	4	4	4	4	4	1	4	4	1	4	1	4	4	4	4	4	4	1	4	4	4	4	1	4	3	1	1	2	4	3	1
1	2	37	4	1	12	7	4	4	1	1	4	4	4	4	4	4	4	3	3	4	4	4	4	1	4	4	1	4	3	4	4	4	4	4	4	2	4	4	4	4	1	4	4	1	2	2	4	3	1
1	2	42	4	1	12	7	4	4	4	1	4	4	4	4	1	4	4	4	4	4	4	4	4	1	4	4	4	4	1	4	4	4	4	4	4	1	1	4	3	3	1	4	3	3	1	4	4	1	1
1	1	40	4	1	10	10	4	4	1	1	4	4	4	4	4	4	4	4	4	4	4	4	4	1	4	4	1	4	2	4	4	4	4	4	4	1	2	4	4	4	1	4	4	1	4	3	4	3	1
1	1	37	3	1	10	2	4	4	1	1	1	4	4	4	4	4	4	3	4	4	4	4	4	1	4	4	1	4	2	4	4	4	4	4	4	1	4	4	4	4	1	4	2	2	4	3	4	1	1
1	1	36	4	1	10	10	4	4	1	1	4	4	4	4	4	4	4	4	4	4	4	4	4	1	4	4	1	4	1	4	4	4	4	4	4	1	4	4	4	4	1	4	4	3	3	4	4	5	1
1	1	36	3	1	12	7	4	4	2	2	4	4	4	4	4	4	4	4	3	4	4	4	4	2	4	3	3	4	1	3	4	4	4	3	4	3	1	4	3	4	1	4	4	2	2	3	4	1	1
1	1	26	3	1	15	7	4	4	3	1	4	4	4	4	4	4	4	4	4	4	4	4	4	1	4	3	4	4	1	4	4	4	4	4	4	2	1	4	4	4	3	4	3	2	2	3	3	3	1
1	1	34	3	1	17	7	4	4	2	1	4	4	4	4	4	4	4	4	4	4	4	4	4	1	3	3	4	4	2	4	4	4	4	4	4	3	2	4	3	4	2	4	3	1	2	4	4	2	1
1	1	32	3	1	10	7	4	4	3	1	4	4	4	4	4	4	4	2	3	3	4	4	4	4	3	3	4	4	3	4	4	4	4	4	4	3	3	4	3	3	4	4	4	2	3	2	4	4	1
1	2	37	4	2	8	7	4	4	1	1	4	4	4	4	4	4	4	4	4	4	4	4	4	1	4	4	4	4	1	4	4	4	4	4	4	1	1	4	2	3	1	3	3	2	2	2	4	2	1
1	2	28	3	1	12	3	4	4	1	2	4	4	4	4	4	4	4	3	3	3	4	4	4	3	4	4	4	4	2	3	4	4	4	4	4	1	1	4	2	4	1	4	4	1	1	1	4	2	1
1	1	42	4	1	15	6	4	4	2	2	4	4	4	4	4	4	3	3	3	3	4	4	4	2	4	4	4	4	1	4	4	4	4	4	3	3	3	3	2	4	1	4	4	1	1	2	4	3	1
1	1	39	3	1	15	16	4	4	1	2	4	4	4	4	4	4	4	2	2	3	4	4	3	1	4	4	4	4	1	4	4	3	4	4	4	1	1	4	2	4	1	4	4	1	1	2	4	4	1
1	2	32	4	1	12	5	4	4	1	2	4	4	4	4	4	4	3	3	2	3	4	4	4	1	4	4	2	4	1	4	4	4	4	4	4	2	1	4	2	3	1	4	4	1	1	1	4	3	1
1	1	40	3	1	15	7	4	4	1	1	4	4	4	4	4	4	3	2	4	3	4	4	4	1	4	4	1	4	1	4	4	3	4	4	4	1	1	4	2	4	2	4	3	2	2	3	4	1	1
1	2	35	3	1	10	7	4	4	1	1	4	4	4	4	4	4	3	2	3	4	4	4	4	1	4	4	4	4	2	4	3	3	4	4	4	1	3	3	3	4	1	4	3	1	3	3	4	1	1
1	2	38	4	4	10	7	4	4	1	1	4	4	4	4	4	4	4	3	3	4	4	4	3	1	4	4	2	4	1	4	4	3	4	4	4	4	2	4	3	4	1	4	3	1	1	1	4	1	1
1	2	30	1	1	15	7	4	4	1	2	4	4	4	4	4	4	3	2	3	4	4	4	3	2	4	4	4	4	1	4	4	4	4	4	4	3	1	3	2	4	2	4	4	2	2	4	3	1	1
1	1	46	3	1	17	16	4	4	2	2	4	4	3	4	4	4	3	3	2	3	4	4	3	2	4	3	3	4	1	3	4	3	4	4	4	4	1	3	3	4	2	4	4	1	1	3	4	2	1
1	1	30	3	1	10	7	4	4	2	4	3	4	3	4	4	4	3	2	3	2	4	4	3	2	3	3	4	3	2	3	4	3	4	4	4	2	3	3	3	4	2	3	2	1	4	4	4	1	1
1	2	36	3	1	10	7	4	4	1	2	3	4	4	4	4	4	3	3	2	3	4	4	3	2	4	3	2	3	2	3	4	3	4	4	3	2	1	3	3	4	1	4	3	1	1	3	4	3	1
1	1	34	3	1	15	7	4	4	1	1	4	4	4	4	4	4	4	4	4	4	3	4	4	2	4	4	4	4	1	3	4	4	4	4	4	1	1	4	3	4	2	4	4	2	2	2	4	4	1
1	2	34	3	1	12	7	4	4	2	2	4	4	4	4	4	4	4	3	3	4	4	4	4	1	4	3	2	4	1	4	3	4	4	4	4	2	3	3	3	4	1	4	3	1	2	3	4	3	1
1	1	33	3	1	12	6	4	4	1	1	4	4	4	4	4	4	3	1	4	4	4	4	3	1	4	3	4	4	2	4	4	4	4	4	4	4	1	3	3	4	1	4	4	2	2	4	4	1	1
1	2	28	3	1	10	5	4	3	3	3	4	4	4	4	4	4	3	2	3	4	4	4	3	1	4	4	4	4	3	3	3	3	4	4	3	2	1	3	3	3	3	4	3	1	1	2	4	5	1
1	2	40	3	1	11	4	4	4	1	2	4	4	4	4	4	3	3	3	3	3	4	4	4	1	4	3	4	4	1	4	4	3	4	4	4	4	1	4	3	3	1	3	4	2	2	3	4	1	1
1	1	35	3	1	17	6	4	4	1	1	4	4	4	4	4	4	4	3	4	4	4	4	4	1	4	4	4	4	1	4	4	3	4	4	4	2	1	4	2	4	1	4	4	1	1	2	4	1	1
1	2	22	3	1	13	7	4	4	1	4	4	4	4	4	4	4	3	4	3	4	4	4	4	1	4	4	1	4	1	4	4	2	4	4	4	4	1	4	3	4	1	4	4	1	1	2	4	2	1
1	2	35	3	1	9	7	4	4	1	3	3	4	4	4	4	4	3	2	2	2	4	3	4	3	4	4	4	4	1	4	4	3	4	4	4	4	1	3	3	2	2	3	4	2	3	4	4	1	1
1	1	37	3	1	10	7	4	4	3	2	4	4	4	4	4	4	3	3	4	4	4	4	3	2	4	4	2	4	1	4	4	3	4	4	4	3	2	4	2	4	1	4	3	2	2	4	4	1	1
1	1	37	4	1	15	7	4	4	1	1	4	4	4	4	4	4	4	3	4	4	4	4	4	2	4	3	1	4	1	4	4	4	4	4	4	1	2	3	2	3	1	4	4	1	1	2	4	3	1
1	1	37	4	1	12	7	4	4	1	2	4	4	4	4	4	4	4	3	3	4	3	4	3	2	4	4	2	4	1	4	4	4	4	4	4	2	3	4	3	4	1	4	4	1	1	2	4	1	1
1	2	37	4	1	12	7	4	4	2	2	4	4	4	3	4	4	3	3	3	3	3	3	3	1	4	3	3	3	2	4	3	4	4	4	4	3	1	3	2	3	4	4	3	2	2	3	4	3	1
1	2	30	3	1	11	7	4	3	2	2	4	4	4	4	4	4	3	4	3	3	4	3	3	1	4	4	4	4	2	3	4	4	4	4	4	3	2	3	2	2	1	4	4	2	2	3	4	5	1
1	1	37	3	1	12	7	4	4	1	1	4	4	4	4	2	4	3	3	3	3	4	3	4	1	4	3	4	4	1	4	4	4	4	4	4	3	2	4	3	4	1	4	4	1	2	5	4	3	1
1	2	37	1	1	10	7	4	4	2	2	4	3	4	4	3	4	3	3	4	3	4	4	4	2	4	4	4	4	2	3	4	4	4	3	4	3	3	4	4	4	2	3	3	2	1	3	4	2	1
1	1	37	1	1	10	7	4	4	2	2	3	4	4	4	4	4	3	4	3	3	4	4	3	1	4	3	2	4	2	3	4	4	4	3	3	3	1	4	2	4	3	3	3	1	2	3	4	1	1
1	2	23	1	1	12	7	4	4	1	2	3	4	4	4	4	4	4	3	3	3	4	4	4	2	4	4	1	4	1	4	2	4	4	4	2	3	1	4	3	4	2	4	4	1	2	2	4	1	1
1	1	37	3	1	14	5	3	4	2	2	3	3	4	4	4	3	4	3	3	3	4	4	4	1	3	4	2	4	1	3	4	3	4	4	4	3	1	4	3	4	1	4	3	2	2	2	4	1	1
1	1	37	3	1	12	7	4	4	2	2	4	4	4	4	4	4	3	3	3	4	4	4	4	1	4	3	4	4	2	4	4	3	4	4	3	2	2	3	3	4	2	4	3	1	1	4	4	1	1
1	2	29	4	1	10	7	4	4	3	1	3	4	4	4	4	4	3	2	2	4	4	4	4	1	4	3	4	4	2	4	4	4	4	4	4	1	1	4	2	4	2	4	4	1	2	3	4	3	1
1	1	30	4	1	10	6	4	4	1	3	3	4	4	4	4	4	3	2	3	4	4	4	3	3	4	3	4	4	2	4	4	3	4	4	4	2	1	4	2	4	2	3	3	2	2	3	4	3	1
1	1	29	4	1	17	7	4	4	1	2	4	4	4	4	4	4	4	3	3	4	4	4	4	2	4	4	3	4	2	4	4	3	4	4	4	2	1	3	2	4	1	4	4	1	1	3	4	1	1
1	1	29	3	1	12	7	4	4	2	1	4	4	4	4	4	4	3	2	3	4	4	3	2	4	3	2	4	1	4	4	3	3	4	4	4	2	1	3	3	4	1	4	4	2	1	3	4	2	1
1	1	36	4	1	10	6	4	4	1	1	4	4	4	4	4	4	4	3	3	4	4	4	4	1	4	4	4	4	2	4	4	4	4	4	4	1	1	4	2	4	1	4	4	1	2	2	4	2	1
1	2	28	1	1	12	7	4	4	2	2	4	4	4	4	4	4	3	3	3	3	4	4	3	2	4	4	4	3	2	4	4	4	4	4	4	3	3	4	3	4	2	4	3	2	1	4	4	1	1
1	1	32	4	1	10	7	4	4	1	3	4	4	4	4	4	4	4	3	3	3	4	4	4	1	3	3	2	4	1	4	4	4	4	4	4	3	1	4	3	4	1	4	3	1	1	2	4	4	1
1	1	34	3	1	10	7	4	4	2	1	4	4	4	4	4	4	4	3	3	3	4	3	4	1	4	4	3	4	2	4	4	4	4	4	4	2	2	4	3	4	1	4	3	1	1	2	3	5	1
1	1	36	3	1	12	7	4	4	1	1	4	4	4	4	4	4	4	4	3	4	4	4	4	1	4	4	4	4	2	4	4	4	4	4	4	1	4	4	1	4	1	4	4	2	2	2	4	3	1
1	2	40	4	1	14	7	4	4	1	1	4	4	4	4	4	4	4	3	4	4	4	3	4	1	4	4	4	4	1	4	4	4	4	4	4	1	4	4	4	4	1	4	4	2	2	2	3	3	1
1	1	34	3	1	15	7	4	4	1	1	4	4	4	4	4	4	4	3	4	4	4	4	4	1	4	4	4	4	1	4	4	4	4	4	4	1	4	4	4	4	1	4	4	2	1	3	4	1	1
1	2	40	4	1	12	7	4	4	1	1	4	4	4	4	4	4	4	3	4	4	4	3	4	1	4	4	3	4	1	4	4	4	4	4	4	2	4	4	1	3	1	4	4	1	2	2	4	1	1
1	1	46	3	2	12	8	4	4	1	1	4	4	4	4	4	4	4	4	4	4	4	4	4	1	4	4	4	4	3	4	4	4	4	4	4	1	4	4	2	4	1	4	4	1	1	2	4	3	1
1	2	36	4	1	10	7	4	4	1	1	4	4	4	4	4	4	4	4	4	4	4	4	4	1	4	4	4	4	3	4	4	4	4	4	4	1	4	4	1	4	1	4	4	1	1	2	4	3	1
1	1	30	3	1	12	5	4	4	1	1	4	4	4	4	4	4	4	3	4	4	4	4	4	1	4	4	4	4	1	4	4	4	4	4	4	1	4	4	4	4	2	4	4	2	3	3	3	3	1
1	2	43	3	1	12	1	4	4	1	1	4	4	4	3	4	4	4	4	4	3	3	4	4	1	3	4	3	4	2	4	3	4	4	4	4	1	3	3	3	4	1	4	3	2	3	4	3	1	1
1	2	36	3	1	15	8	4	4	3	2	4	4	4	4	4	4	3	3	3	3	4	4	4	1	4	4	4	4	3	4	4	4	4	4	4	1	1	4	4	4	1	4	3	1	1	2	4	4	1
1	2	37	3	2	8	1	3	3	2	2	4	4	4	3	4	3	3	3	3	3	3	3	3	1	3	3	3	3	3	3	3	3	4	4	4	2	2	3	3	3	1	3	3	2	2	2	4	4	1
1	2	37	3	1	10	6	4	4	1	1	4	4	4	4	4	4	4	4	4	4	4	3	4	1	4	3	2	4	2	3	4	4	4	4	4	1	4	4	2	4	1	4	4	1	2	2	4	4	1
1	1	39	1	1	15	7	4	4	1	1	4	4	4	4	4	4	4	4	4	4	4	4	3	1	4	4	4	3	1	4	4	4	4	4	4	1	3	4	1	4	1	3	3	2	2	3	4	2	1
1	1	37	2	2	12	16	4	4	4	1	4	4	4	4	4	4	4	4	4	3	4	4	4	2	3	3	3	3	2	4	4	4	4	4	4	3	2	3	2	4	1	3	3	1	1	4	4	3	1
1	2	44	3	2	12	9	4	4	1	1	4	4	4	4	4	4	4	4	4	4	4	4	3	1	3	3	3	4	3	4	4	4	4	4	4	1	1	4	1	4	1	4	3	2	1	2	4	3	1
1	1	37	3	1	12	7	4	1	1	1	4	4	4	4	4	4	3	3	3	3	3	3	3	1	3	3	3	4	2	4	3	3	4	4	4	3	3	4	3	4	1	4	3	2	2	3	4	3	1
1	1	38	3	1	12	6	3	3	3	3	2	3	3	4	3	3	4	4	4	4	4	3	3	1	3	3	3	3	2	3	3	3	4	4	4	3	2	4	2	4	2	3	3	2	2	4	3	5	0
1	2	38	3	1	12	9	4	4	1	1	4	3	4	4	4	4	4	4	4	4	4	4	3	1	3	3	2	4	2	3	4	4	4	4	3	3	1	3	1	4	1	3	3	2	2	2	4	3	1
1	1	27	3	2	10	10	4	4	1	1	4	4	4	4	4	4	4	4	4	4	3	4	3	3	3	4	1	4	2	3	3	3	4	4	4	1	1	2	1	4	1	3	2	2	4	4	4	3	1
1	1	37	3	1	12	11	4	4	1	1	4	4	4	4	4	4	4	4	4	4	4	4	4	1	4	4	3	4	1	4	4	4	4	4	4	4	3	4	4	4	1	4	3	2	3	3	3	1	1
1	2	45	3	1	10	9	4	4	1	1	1	4	4	4	4	4	4	4	3	3	3	4	4	1	4	3	3	3	2	3	4	4	4	4	4	1	2	4	1	3	1	3	3	2	1	2	4	3	1
1	1	37	3	1	12	10	4	4	1	1	4	4	4	4	4	4	4	4	4	3	4	4	4	1	4	4	1	4	1	4	4	4	4	4	4	1	2	4	4	4	1	4	3	1	2	2	4	3	1
1	2	37	3	1	10	7	4	4	4	1	4	4	4	4	4	4	4	4	4	4	4	4	4	1	4	4	4	4	2	3	4	4	4	4	4	4	2	2	3	3	1	3	3	2	2	3	4	4	1
1	2	30	3	1	15	9	4	4	1	1	4	4	4	4	4	4	4	4	4	3	4	4	4	1	4	4	3	4	2	3	4	4	4	4	4	1	2	4	4	3	1	4	3	3	1	2	4	2	1
1	1	36	4	1	15	6	4	4	3	2	3	3	4	4	4	4	3	3	3	4	4	4	4	1	4	4	4	4	2	4	4	2	4	3	4	3	1	4	3	4	2	4	4	2	2	4	4	3	1
1	2	37	4	1	9	2	3	3	2	3	4	4	4	4	4	4	4	4	3	3	3	4	3	2	3	4	4	4	3	4	4	4	4	3	4	3	2	3	3	3	1	4	4	2	2	3	3	1	1
1	2	37	3	1	8	2	4	4	1	1	4	4	4	4	4	4	4	4	4	4	4	4	3	2	4	3	1	4	1	4	4	4	4	4	4	2	4	4	1	4	1	4	3	2	1	1	4	1	1
1	2	37	4	1	10	2	4	4	2	1	4	4	4	3	4	4	4	4	4	4	4	3	4	1	4	4	4	3	2	4	4	4	4	4	4	1	1	3	2	4	1	4	3	1	1	2	4	3	1
1	1	41	4	1	12	14	4	4	1	1	3	4	4	4	4	4	4	4	4	4	4	4	4	1	4	4	4	4	2	4	4	3	4	4	4	1	2	4	4	3	1	4	4	1	1	1	1	3	1
1	1	47	4	1	12	10	4	4	1	1	4	4	4	4	4	4	4	4	4	4	4	4	3	1	4	4	3	4	2	4	4	4	3	4	4	1	3	4	2	4	1	4	3	2	3	3	4	3	1
1	1	37	4	1	15	10	4	4	1	1	4	4	4	4	4	4	4	4	4	4	4	4	4	1	4	2	3	4	3	4	4	4	4	4	4	1	4	4	3	4	1	4	4	1	1	1	1	2	1
1	2	34	4	1	15	4	4	4	1	1	4	4	4	4	4	4	3	3	3	3	4	4	4	1	4	3	3	4	2	4	3	4	4	3	3	2	1	4	4	4	1	3	3	2	2	2	4	3	1
1	2	42	3	1	12	8	4	4	1	1	4	4	4	4	4	4	3	3	3	3	4	4	4	2	4	3	3	4	2	4	4	4	4	3	3	3	2	4	2	4	2	3	4	2	2	4	4	1	1
1	2	35	3	4	10	7	4	4	1	1	2	4	4	4	3	4	3	3	4	3	4	3	3	1	4	3	3	4	2	3	4	4	4	3	3	3	2	3	3	4	2	3	2	2	2	3	4	3	1
1	2	35	4	1	10	4	4	4	1	2	3	4	4	4	4	4	4	3	3	3	4	3	3	2	4	3	3	3	3	3	4	4	4	3	4	3	1	4	2	3	2	4	3	2	2	3	4	4	1
1	2	30	3	1	10	7	4	4	1	1	4	4	4	4	4	4	3	3	3	4	4	3	3	1	4	3	4	4	2	4	4	4	4	3	4	2	1	4	3	3	1	4	3	1	2	2	4	3	1
1	2	32	4	1	12	7	4	3	2	1	3	4	4	4	4	4	4	4	4	3	4	3	3	1	4	4	2	4	2	3	4	4	4	2	3	3	2	4	1	3	1	4	3	2	2	3	4	1	1
1	1	33	4	1	12	17	4	4	1	1	3	4	4	4	4	4	4	4	4	3	4	4	3	1	4	4	4	4	2	4	4	4	4	2	3	3	2	4	2	4	1	4	4	2	1	3	4	2	1
1	2	40	3	1	10	1	4	4	1	1	4	4	4	4	4	4	4	4	4	4	3	4	4	1	4	3	3	4	2	4	4	4	4	4	4	1	2	4	1	4	1	4	3	1	1	3	4	2	1
1	1	37	4	1	17	17	4	4	1	1	4	4	4	4	4	4	4	4	4	4	4	4	4	1	4	4	3	4	1	4	4	4	4	4	4	2	2	4	1	4	1	4	3	1	2	2	4	4	1
1	1	46	3	1	12	16	4	4	1	1	3	4	4	4	4	4	4	3	3	4	3	4	4	1	4	4	4	4	2	3	4	4	4	4	4	3	2	4	3	4	2	4	3	2	1	4	4	1	1
1	2	36	1	1	8	1	4	4	3	3	4	3	2	3	4	3	3	3	4	4	4	3	3	2	4	4	3	3	2	3	3	3	4	3	3	3	2	2	3	4	3	4	1	3	2	4	2	2	1
1	2	32	4	1	10	6	4	4	1	2	4	4	4	4	4	4	4	3	3	4	4	4	3	2	4	4	2	4	2	4	4	4	4	4	4	2	2	3	3	4	2	4	4	2	4	4	3	2	1
1	2	30	1	1	9	1	4	4	1	2	4	4	4	4	4	4	3	3	4	3	3	4	3	2	4	3	3	4	3	3	4	4	4	3	3	3	2	3	3	3	2	3	3	2	6	3	3	5	1
1	2	44	4	4	12	4	4	3	1	2	3	3	4	4	4	4	4	3	3	3	3	3	3	2	4	3	3	3	2	3	3	3	3	3	3	2	2	3	3	2	1	3	3	2	2	3	4	3	1
1	2	32	4	1	10	9	4	4	1	1	1	4	4	4	4	4	4	4	3	3	4	4	4	1	4	4	4	4	1	4	4	4	4	4	4	1	4	4	1	3	1	4	4	2	1	3	4	3	1
1	1	37	3	1	12	7	4	4	1	1	4	4	4	4	4	4	3	3	3	3	4	4	4	1	4	3	4	4	1	4	4	4	4	4	4	2	4	4	1	4	1	4	4	2	2	2	4	2	1
1	2	37	4	1	12	7	4	4	1	1	4	4	4	4	4	4	4	3	3	3	4	3	4	2	4	4	4	4	1	4	4	4	4	4	4	2	4	4	4	3	1	3	4	2	2	3	3	3	1
1	1	37	1	1	12	8	4	4	1	1	4	4	3	4	4	4	4	3	3	3	4	4	4	1	4	4	4	4	1	4	4	4	4	4	4	3	3	3	3	3	2	3	4	2	2	2	4	3	1
1	2	43	4	1	14	8	4	4	1	4	4	4	4	4	4	4	4	4	3	3	4	4	4	1	4	4	4	4	1	4	4	4	4	4	4	1	4	4	1	4	1	4	4	2	2	2	4	3	1
1	2	37	4	1	15	7	4	4	1	2	4	4	4	4	4	4	4	3	4	4	4	3	4	1	4	4	3	4	3	4	4	4	4	4	4	1	3	4	2	3	1	4	4	2	1	2	4	4	1
1	2	46	4	1	10	7	4	4	1	1	4	4	4	4	4	4	3	3	3	3	4	4	4	1	4	4	4	4	1	4	4	4	4	4	4	1	4	4	1	4	1	4	4	3	3	3	2	2	1
1	1	43	3	1	12	7	4	4	1	1	4	4	4	4	4	4	4	3	3	3	4	4	4	1	4	4	4	4	1	4	4	4	4	4	4	3	4	4	2	4	1	4	4	1	2	2	4	2	1
1	1	37	1	1	12	6	4	4	1	1	4	4	4	4	4	4	3	4	3	3	4	4	4	1	4	4	4	4	2	4	4	4	4	4	4	1	4	4	1	4	1	4	4	2	1	3	4	4	1
1	1	37	4	1	10	17	4	4	1	1	4	4	4	4	4	4	4	3	3	3	4	4	4	1	4	4	4	4	3	4	4	4	4	4	4	4	3	4	1	4	1	4	4	2	3	3	4	3	1
1	1	45	4	1	12	16	4	4	1	4	4	4	4	4	4	4	3	3	3	3	4	4	4	1	4	4	4	4	1	4	4	4	4	4	4	4	4	4	1	4	1	4	4	1	2	3	4	2	1
1	2	37	3	1	10	4	4	4	1	1	4	4	4	4	4	4	4	3	3	3	4	4	4	1	4	4	4	4	1	4	4	4	4	4	4	1	4	4	1	4	1	4	4	1	1	2	4	1	1
1	2	38	3	1	12	9	4	4	1	1	4	4	4	4	4	4	4	3	3	3	4	4	4	1	4	4	4	4	1	4	4	4	4	4	4	1	4	4	1	4	1	4	4	3	2	3	2	3	1
1	2	42	3	1	12	9	4	4	1	1	4	4	4	4	4	4	4	3	3	4	4	4	4	1	4	4	4	4	2	4	4	4	4	4	4	1	4	4	1	4	1	4	4	2	2	3	4	2	1
1	1	40	1	1	10	7	4	4	2	1	4	4	4	4	4	4	4	3	3	4	4	4	4	1	4	4	4	4	1	4	4	4	4	4	4	1	4	4	1	4	2	4	4	2	3	3	4	2	1
1	1	37	3	1	2	10	4	4	1	1	4	4	4	4	4	4	4	3	3	3	4	4	4	2	4	4	4	4	1	4	4	4	4	4	4	1	4	4	1	4	1	4	4	2	3	3	4	3	1
1	2	35	4	1	15	4	4	4	1	1	4	4	4	4	4	4	4	3	4	3	4	3	4	1	4	4	4	4	1	4	4	4	4	4	4	1	4	4	1	3	1	4	4	2	2	2	3	3	1
1	2	37	3	1	10	8	4	4	1	1	4	4	4	4	4	4	4	3	3	3	4	4	4	1	4	4	4	4	1	4	4	4	4	4	4	1	4	4	4	4	1	4	4	3	2	3	3	1	1
1	2	25	3	1	8	4	4	4	1	1	4	4	4	4	4	4	4	3	3	4	4	4	4	1	4	4	3	4	2	4	4	4	4	2	4	1	2	4	2	4	2	4	3	2	1	3	4	4	1
1	2	37	3	1	12	8	4	4	1	1	4	4	4	4	4	4	4	4	3	4	4	3	4	1	4	4	3	4	1	4	4	4	4	4	4	1	3	4	2	4	2	4	4	2	3	3	4	1	1
1	2	37	3	1	10	4	4	4	1	1	4	4	4	4	4	4	4	3	3	4	4	4	4	1	4	4	2	4	2	4	4	3	4	1	4	1	3	4	1	4	1	4	4	2	1	3	4	3	1
1	1	45	4	1	12	16	4	4	1	2	3	4	4	4	4	4	4	3	3	4	4	3	3	2	4	3	4	4	2	3	4	4	3	2	3	2	1	4	3	3	1	4	3	1	2	3	4	1	1
1	1	43	3	1	12	16	4	4	1	2	4	4	4	4	4	4	3	4	4	4	4	4	4	1	4	4	1	4	2	4	4	4	4	3	3	1	1	4	2	4	1	4	4	1	2	4	4	1	1
1	1	30	3	1	10	7	4	4	1	1	4	4	4	4	4	4	4	3	3	3	4	4	3	2	3	3	2	4	2	3	4	3	3	3	3	2	2	3	2	4	1	3	3	2	2	3	3	1	1
1	1	39	3	1	15	16	4	4	1	1	4	4	4	4	4	4	4	3	4	4	4	4	4	1	4	3	3	4	2	4	4	4	3	3	3	1	2	4	2	4	1	4	4	1	1	2	4	4	1
1	2	35	3	2	10	9	4	4	1	1	4	4	4	4	4	4	3	3	3	4	4	4	3	2	4	3	2	4	2	4	4	4	4	3	3	1	2	4	2	4	1	4	3	2	2	1	4	3	1
1	1	38	3	1	10	7	4	4	1	2	4	4	4	4	4	4	3	3	3	3	4	4	3	2	4	3	2	4	2	4	4	4	3	3	3	2	1	4	2	4	1	4	4	1	1	3	4	3	1
1	1	34	3	1	15	7	4	4	1	1	4	4	4	4	4	4	4	3	4	3	4	4	4	1	4	4	4	4	1	4	4	4	4	4	4	1	4	4	1	4	1	4	4	2	2	3	4	2	1
1	2	45	3	1	8	8	4	4	1	1	4	4	4	4	4	4	4	3	3	3	4	4	4	2	4	4	3	4	1	4	4	4	4	4	4	1	4	4	1	3	1	4	4	2	1	3	4	2	1
1	1	45	4	1	15	17	4	4	1	1	4	4	4	4	4	4	4	3	3	4	4	4	4	1	4	4	4	4	2	4	4	4	4	4	4	1	4	4	1	4	1	4	4	2	3	2	4	3	1
1	1	28	3	1	10	10	4	4	1	1	4	4	4	4	4	4	4	3	3	3	4	4	4	1	4	4	4	4	1	4	4	4	4	4	4	1	4	4	4	4	1	4	4	2	2	2	4	2	1
1	2	35	3	1	12	5	4	4	1	1	4	4	4	4	4	4	4	3	4	4	4	3	4	4	4	4	4	4	2	4	4	4	4	4	4	1	3	4	1	3	1	4	4	2	2	2	4	3	1
1	1	41	1	1	12	18	4	4	1	1	4	4	4	4	4	4	4	4	4	3	4	4	4	1	4	4	4	4	1	4	4	4	4	4	4	1	3	4	1	4	1	4	4	2	2	2	4	2	1
1	2	40	4	1	10	7	4	4	1	1	1	4	4	4	4	4	4	3	3	4	4	4	4	1	4	4	4	4	2	4	4	4	4	4	4	1	4	4	4	3	4	4	4	2	2	3	4	3	1
1	2	36	3	1	10	4	4	4	1	1	4	4	4	4	4	4	3	3	3	3	4	3	4	1	4	4	4	4	1	4	4	4	4	4	4	1	4	4	1	4	1	4	4	2	1	3	4	2	1
1	1	47	3	1	10	7	4	4	1	1	3	4	4	4	4	3	3	3	3	3	3	4	3	2	3	3	1	3	2	3	3	3	4	4	4	2	1	3	3	4	2	3	3	2	2	3	4	1	1
1	1	37	3	1	10	16	4	4	1	1	4	4	4	4	4	4	4	4	3	3	3	4	3	1	3	3	1	4	1	3	4	4	4	4	4	1	2	3	3	4	1	2	2	2	3	4	3	1	1
1	1	37	3	1	12	16	4	4	1	1	4	4	4	3	4	4	3	3	3	3	4	3	4	2	3	3	4	4	2	3	4	4	4	4	4	1	1	3	4	4	1	4	4	1	1	4	4	3	1
1	2	37	4	1	12	9	4	4	1	1	4	4	4	4	4	4	4	4	4	4	4	4	4	1	4	4	1	4	2	4	4	4	4	4	4	1	2	4	1	4	1	3	2	2	2	2	4	3	1
1	2	39	1	1	12	9	4	4	1	1	4	4	4	4	4	4	4	4	4	4	4	3	4	1	3	3	1	4	1	3	4	4	4	4	4	1	2	4	1	4	1	3	3	2	2	2	4	3	3
1	1	27	3	1	12	5	4	4	1	2	1	4	4	4	4	4	4	4	4	4	4	4	4	1	4	4	4	4	1	4	4	4	4	4	4	4	4	4	4	4	1	4	3	2	2	3	4	5	1
1	2	37	4	2	12	8	4	4	1	1	4	4	4	4	4	4	4	4	4	4	4	3	3	1	1	3	3	3	2	3	3	3	4	4	4	1	3	4	1	4	1	3	2	2	2	3	3	3	1
1	2	35	4	1	17	8	4	4	1	1	4	4	4	4	4	4	4	4	4	4	4	3	3	1	4	3	3	4	2	4	4	4	4	4	4	1	2	3	1	3	1	4	3	2	2	3	3	2	1
1	1	31	3	1	15	10	4	4	1	1	4	4	4	4	4	4	4	3	4	4	4	4	4	1	4	4	4	4	1	4	4	4	4	4	4	1	1	4	1	4	1	4	4	1	1	2	4	2	1
1	2	34	3	1	10	9	4	4	1	1	4	4	4	4	4	4	4	4	4	4	4	4	4	1	4	4	4	4	2	4	4	4	4	4	4	1	3	4	1	4	1	4	4	2	1	2	4	3	1
1	2	42	4	1	15	9	4	4	2	3	3	4	4	4	4	4	4	4	4	4	4	3	4	1	4	4	4	4	1	3	4	4	4	4	4	1	1	4	2	3	1	4	4	2	2	2	3	3	1
1	2	32	1	1	10	9	4	4	1	1	4	4	4	4	4	4	4	4	4	4	4	4	4	1	4	4	3	4	1	4	4	4	4	4	4	3	2	4	1	4	1	4	3	1	1	2	4	3	1
1	1	37	1	1	10	24	4	4	2	1	4	4	4	4	4	4	4	4	4	4	4	4	4	2	4	4	4	4	1	4	4	4	4	4	4	2	2	4	3	4	1	4	4	1	2	3	4	5	1
1	1	49	4	1	10	23	3	4	1	2	4	4	4	4	4	4	4	3	4	4	4	4	4	4	4	4	3	4	2	4	4	4	4	4	4	1	2	4	2	4	4	4	4	2	1	2	3	2	1
1	1	43	3	1	10	23	4	4	1	2	4	4	4	4	4	4	4	2	3	4	4	2	4	1	4	4	3	4	2	4	4	4	4	4	4	2	1	4	2	4	1	4	3	2	2	4	3	5	2
1	2	36	3	1	10	9	4	4	1	1	4	4	4	4	4	4	4	4	4	4	4	4	4	1	4	4	4	4	2	4	4	4	4	4	4	1	3	4	1	4	1	4	3	2	2	3	3	2	1
1	1	44	3	1	10	22	4	4	1	1	4	4	4	4	4	4	4	4	4	4	4	4	4	1	4	4	1	4	1	4	4	4	4	4	4	3	1	4	2	4	3	4	4	2	2	2	4	2	1
1	2	30	3	1	8	9	4	4	3	1	4	4	4	4	4	4	4	4	4	4	4	4	4	1	4	4	4	4	1	4	4	4	4	4	4	1	4	4	1	4	2	4	4	2	2	2	3	3	1
1	2	49	4	3	12	10	4	4	3	4	4	4	4	4	4	4	4	4	4	4	4	4	4	1	4	4	4	4	1	4	4	4	4	4	4	1	4	4	1	4	1	4	4	2	3	2	4	5	1
1	1	55	1	1	10	24	4	4	1	1	4	4	4	4	4	4	4	4	4	4	4	4	4	1	4	4	4	4	3	4	4	4	4	4	4	1	1	4	1	4	1	4	4	1	2	2	4	2	1
1	2	35	1	1	10	8	4	4	2	1	4	4	4	4	4	4	4	4	3	3	4	3	3	1	4	3	3	4	2	3	4	4	4	4	4	4	2	3	1	4	1	3	3	2	2	2	4	4	1
1	1	47	4	1	15	17	4	4	2	1	4	4	4	4	4	4	4	3	3	3	4	4	3	1	4	2	3	4	2	3	3	3	4	3	4	1	2	4	2	3	1	4	4	2	2	2	3	1	1
1	1	40	3	1	10	17	4	4	1	1	4	4	4	4	4	4	4	3	3	3	4	4	4	2	4	3	2	4	2	3	4	3	4	4	4	2	2	3	3	4	1	4	3	2	2	2	4	3	1
1	1	38	3	1	10	17	4	4	2	1	2	4	4	4	4	4	3	3	3	4	4	4	4	1	4	3	3	4	1	4	4	4	4	4	4	1	3	4	3	4	1	4	3	1	1	3	4	3	1
1	2	42	3	2	10	9	4	4	1	1	3	4	4	4	4	4	4	3	3	4	4	3	3	1	4	3	4	4	2	3	4	4	4	4	4	1	2	4	2	3	1	4	4	2	2	2	3	5	1
1	2	40	3	1	10	9	4	4	1	1	4	4	4	4	4	4	4	3	3	3	4	4	3	1	4	3	2	4	2	3	4	4	4	4	4	2	4	4	4	4	1	4	3	2	2	2	4	2	1
1	2	33	4	1	15	8	4	4	1	1	4	4	4	4	4	4	4	3	4	4	4	2	4	1	4	4	4	4	1	4	4	3	4	1	4	2	1	4	2	2	1	4	4	2	1	2	4	1	1
1	2	51	4	1	15	8	4	4	1	1	4	4	4	4	4	4	4	4	4	4	4	3	4	1	4	4	4	4	1	4	4	4	4	4	4	4	4	4	4	4	1	4	4	2	2	2	3	1	1
1	1	48	4	1	10	24	4	4	1	2	4	4	4	4	3	3	3	3	3	3	4	4	3	2	4	3	2	4	2	3	3	3	4	3	3	2	2	3	2	4	2	2	3	2	3	3	4	1	1
1	2	50	4	1	15	9	4	4	1	1	3	4	4	4	3	3	3	3	3	4	4	3	4	1	4	4	4	4	2	3	4	4	4	4	3	2	3	4	2	4	2	4	3	1	1	1	4	4	1
1	2	35	4	1	12	9	4	4	1	1	4	4	4	4	4	4	4	4	4	4	4	4	4	1	4	4	4	4	2	3	4	4	4	4	4	2	4	4	2	4	1	3	4	1	1	1	4	2	1
1	2	41	4	1	15	8	4	4	1	1	4	4	4	4	4	4	3	3	4	4	3	4	4	1	4	3	4	4	2	4	4	4	4	4	4	2	2	4	3	3	1	3	4	1	2	2	4	3	1
1	1	32	4	1	15	5	4	4	1	1	4	4	4	4	4	4	3	3	3	4	4	4	4	1	4	3	4	4	2	4	4	4	4	4	4	2	3	3	3	3	1	4	3	2	1	2	4	2	1
1	1	34	4	1	15	10	4	4	1	2	3	4	4	4	4	3	3	3	3	3	3	4	3	2	3	3	4	4	2	3	4	4	4	3	3	1	1	3	2	2	1	2	3	2	2	2	4	1	1
1	2	32	4	1	15	6	4	4	1	1	4	4	4	4	4	4	3	3	4	4	3	4	4	1	4	4	4	4	2	4	4	4	4	4	4	2	4	4	4	3	1	4	4	1	1	2	4	3	1
1	1	48	4	2	15	25	4	4	1	1	4	4	4	4	4	4	4	3	3	3	4	4	3	1	3	3	1	4	2	3	3	3	4	4	4	3	2	3	1	4	1	3	3	2	1	2	4	1	1
1	1	39	4	1	10	22	4	4	1	1	4	4	4	4	4	4	4	4	3	3	3	4	3	1	3	3	2	4	2	3	3	3	4	4	4	1	2	3	1	4	1	3	3	2	2	3	4	2	1
1	1	52	4	1	10	24	2	4	2	2	4	4	4	4	4	4	4	4	4	4	4	4	3	1	3	3	3	4	2	3	3	3	4	4	4	2	1	3	2	4	2	3	3	1	2	2	4	3	1
1	2	38	3	1	10	8	4	4	2	2	4	4	4	4	4	4	4	4	4	4	4	4	3	1	3	3	2	4	2	3	4	4	4	4	4	3	2	4	2	4	3	3	3	2	2	3	4	2	1
1	1	37	4	1	10	24	4	3	1	1	4	4	4	4	4	4	4	4	4	3	4	4	3	4	4	3	2	4	2	3	3	3	4	4	4	1	3	3	1	4	1	4	3	2	2	2	4	1	1
1	2	35	4	1	12	6	4	4	1	1	4	4	4	4	4	4	4	4	4	3	4	4	3	1	4	3	3	4	2	4	4	4	4	4	4	1	2	4	1	4	1	4	3	2	2	3	4	3	1
1	1	40	3	1	10	16	4	4	3	3	4	3	4	3	3	4	4	3	4	3	4	4	3	1	4	3	1	4	2	3	3	3	4	4	4	4	3	3	1	4	1	3	3	2	2	4	4	3	1
1	2	37	3	2	10	6	4	4	2	2	4	4	4	4	4	4	4	3	3	3	4	4	3	1	3	3	2	4	2	3	3	3	4	4	4	2	2	3	1	4	1	4	3	2	2	4	4	3	1
1	2	30	4	1	15	6	4	4	1	1	4	4	4	4	4	4	4	4	4	3	3	4	3	1	3	3	3	4	2	3	3	3	4	4	4	1	1	3	1	4	1	4	3	1	1	3	4	2	1
1	2	37	3	1	12	1	4	4	2	3	2	4	4	4	4	4	4	3	3	3	3	4	3	1	4	3	3	4	2	3	4	3	4	4	4	2	1	3	1	4	1	3	2	2	2	2	4	3	1
1	2	39	4	1	10	6	4	4	1	1	4	4	4	4	4	4	4	3	3	3	3	4	3	2	3	3	4	4	2	3	3	3	4	4	4	2	2	3	1	3	1	4	3	2	2	3	4	1	1
1	1	51	4	2	10	25	4	4	1	1	4	4	4	4	4	4	4	3	3	4	3	4	3	1	3	3	1	4	2	3	3	3	4	4	4	1	1	3	1	4	1	3	3	2	1	2	4	3	1
1	1	48	4	1	10	24	4	4	1	1	4	4	3	4	4	4	3	3	3	3	4	4	3	1	3	3	1	4	2	3	4	4	4	4	4	1	1	4	1	4	1	3	3	1	1	2	4	3	1
1	1	42	3	1	10	24	4	4	1	1	4	3	4	4	4	4	4	3	4	4	4	4	4	1	1	4	3	4	1	4	4	4	3	3	4	1	4	4	4	4	1	4	4	1	4	3	4	3	1
1	2	37	3	1	12	8	4	4	1	1	4	4	4	4	4	4	4	4	4	4	4	4	4	1	4	4	2	4	1	4	4	4	4	4	4	1	4	4	1	4	1	4	4	2	1	2	4	3	1
1	1	38	4	1	12	27	4	4	1	2	4	4	4	4	4	4	4	4	4	4	4	4	4	2	4	3	4	4	2	4	4	4	4	4	4	1	3	4	1	4	1	4	2	2	3	4	4	3	1
1	1	37	4	1	10	23	4	4	1	1	4	4	4	4	4	3	4	3	3	3	4	4	4	1	4	4	4	4	3	4	4	4	4	3	4	3	1	4	1	4	1	4	4	1	2	3	4	3	1
1	1	37	4	2	12	1	4	4	4	4	3	4	4	4	4	4	4	3	4	4	4	4	4	3	4	4	3	4	3	4	4	4	4	4	4	3	4	4	3	3	1	4	4	1	2	2	4	4	1
1	2	32	4	1	10	9	4	4	1	1	4	4	4	4	4	4	4	4	4	4	4	4	4	1	4	4	4	4	2	4	4	4	4	4	4	1	4	4	2	4	2	4	3	1	2	2	4	4	1
1	1	45	1	1	12	6	4	4	1	1	4	4	4	4	4	4	3	4	4	4	4	4	4	1	4	4	3	4	1	4	4	4	4	4	4	1	1	4	3	4	1	4	4	1	2	2	4	3	1
1	2	37	3	1	12	8	4	4	1	1	3	4	4	4	3	4	3	4	3	4	4	4	3	2	4	4	4	4	2	2	4	4	4	4	4	1	3	4	1	4	1	4	4	2	1	3	4	3	1
1	1	32	3	1	12	7	4	4	1	2	4	4	4	4	4	4	4	4	4	4	4	4	4	1	4	4	4	4	2	4	4	4	4	4	4	1	1	4	2	4	1	4	3	1	1	2	4	3	1
1	1	35	3	1	12	24	4	4	1	1	4	3	4	4	4	4	4	4	4	4	4	4	4	2	4	4	4	4	3	4	4	4	4	4	4	1	2	4	3	4	1	3	3	1	2	2	4	1	1
1	1	52	3	2	10	24	4	4	1	1	4	4	4	4	4	4	4	4	4	4	4	4	4	4	4	4	4	4	1	4	4	4	4	4	4	1	3	2	4	4	1	4	4	1	2	2	4	3	1
1	2	38	3	1	12	8	4	4	1	1	4	4	4	4	4	4	4	4	4	4	4	4	4	1	4	4	4	4	1	3	4	4	4	4	4	1	2	4	2	4	1	4	4	2	1	2	4	3	1
1	2	35	3	1	8	9	4	4	1	2	4	4	4	4	4	3	4	3	4	4	4	3	4	3	4	4	4	4	2	4	4	4	4	4	4	1	1	4	1	4	1	4	3	2	2	2	4	4	1
1	2	40	3	1	8	8	4	4	1	1	4	4	4	4	4	4	4	4	4	4	4	4	4	1	4	4	4	4	1	3	4	4	4	4	4	1	4	4	1	4	1	4	4	2	2	2	4	4	1
1	2	38	4	1	12	8	4	4	1	1	4	4	4	4	4	4	3	4	4	4	4	3	3	2	4	4	4	4	2	3	4	4	4	4	4	1	1	4	1	4	1	4	4	2	2	3	4	4	1
1	2	35	1	1	10	9	4	4	1	1	4	4	4	4	4	4	4	4	4	4	4	4	4	4	4	4	4	4	1	3	4	4	4	4	4	1	3	4	3	3	1	4	4	2	2	3	3	3	1
1	1	35	4	1	10	7	4	4	1	1	4	4	4	4	4	4	4	3	4	4	4	4	4	1	4	4	4	4	1	3	4	4	4	4	4	1	1	4	1	4	1	4	4	2	2	2	4	2	1
1	1	38	3	1	12	9	4	4	1	1	4	4	4	4	4	4	4	4	4	4	4	4	4	1	4	4	3	4	1	3	4	4	4	4	4	1	3	2	2	4	1	4	4	1	2	3	4	1	1
1	2	36	3	1	15	9	4	4	1	1	4	4	4	4	4	4	4	4	4	4	4	4	3	1	4	4	4	4	1	4	4	4	4	4	4	3	1	4	3	4	1	4	4	2	4	2	3	1	1
1	1	37	3	1	10	9	4	4	1	1	4	4	4	4	4	4	4	4	4	4	4	4	4	1	4	4	4	4	1	4	4	4	4	4	4	1	1	4	1	4	1	4	4	2	2	3	3	2	1
1	1	39	3	1	12	24	4	4	1	1	4	4	4	4	4	4	4	4	4	4	4	4	4	4	4	4	4	4	1	4	4	4	4	4	4	1	1	4	1	4	1	4	4	1	1	1	4	3	1
1	2	50	3	1	12	7	4	4	1	1	4	4	4	4	4	4	4	3	4	4	4	4	4	1	3	4	4	4	1	4	4	4	4	4	4	1	1	4	1	4	2	4	4	2	2	3	3	3	1
1	2	32	3	1	10	0	4	4	3	3	4	4	4	4	4	3	4	4	4	4	4	4	4	1	4	4	4	4	1	4	4	4	4	4	4	1	4	4	3	4	2	4	4	2	1	2	4	5	1
1	1	25	3	1	13	1	4	4	2	1	4	4	4	4	4	4	4	4	4	4	4	4	4	1	4	4	3	4	1	4	4	4	4	4	4	1	4	3	1	4	1	4	4	1	4	3	4	5	1
1	1	32	4	1	17	2	4	4	1	1	4	4	4	4	4	4	4	3	4	4	4	3	3	1	4	4	4	4	1	4	4	4	4	4	4	4	1	4	1	4	1	4	4	1	2	3	4	1	1
1	2	35	1	1	10	9	4	4	1	1	4	4	4	4	4	4	4	4	4	4	4	4	4	1	4	3	4	4	2	4	4	3	4	4	4	1	3	4	2	4	1	4	3	2	2	3	4	3	1
1	2	32	3	1	12	8	4	4	1	1	4	4	4	4	3	4	3	4	3	3	4	4	4	2	4	2	4	4	2	4	4	4	4	4	4	2	1	3	2	4	1	4	3	2	3	3	4	5	1
1	2	28	3	1	10	8	4	4	1	1	4	4	4	4	4	4	4	4	4	4	4	4	4	1	4	4	4	4	1	4	4	4	4	4	4	1	2	4	4	4	1	4	4	2	2	3	4	4	1
1	2	42	4	1	12	24	4	4	1	2	4	4	4	4	4	4	4	4	4	4	4	3	4	2	4	4	3	4	2	3	4	4	4	4	4	2	2	4	3	4	1	4	4	1	2	2	4	4	1
1	2	33	1	1	8	11	4	4	2	2	4	4	4	4	4	4	3	3	4	4	4	3	4	3	4	4	3	4	1	4	4	3	4	4	4	2	2	4	3	4	1	4	3	2	2	3	4	5	1
1	1	49	4	2	10	25	4	4	1	2	4	4	4	4	4	4	4	3	4	4	4	4	3	2	4	4	2	4	1	4	4	4	4	4	4	2	2	4	3	4	2	3	3	2	2	3	4	1	1
1	1	45	3	1	10	25	4	4	1	1	4	4	4	4	4	4	3	2	3	4	4	4	4	1	4	4	3	4	1	4	4	4	4	4	4	4	2	4	4	4	1	4	4	2	2	2	4	3	1
1	2	40	4	1	12	9	4	4	1	1	4	4	4	4	4	4	4	3	4	4	4	3	4	1	4	3	3	4	1	4	4	3	4	4	4	1	2	4	3	3	1	4	4	2	2	2	4	2	1
1	2	34	4	1	10	9	4	4	1	2	4	4	4	4	4	4	3	3	4	4	4	4	4	1	4	4	4	4	1	4	3	3	4	4	4	3	1	4	3	4	2	3	4	2	1	2	4	4	1
1	2	26	3	1	12	8	4	4	1	2	1	3	3	4	4	4	3	3	3	4	4	4	3	1	4	3	4	4	2	4	4	4	4	4	4	1	1	4	3	4	1	4	4	2	2	4	3	2	1
1	2	27	3	1	8	1	4	3	2	3	4	4	4	4	4	4	3	3	3	3	4	3	3	1	3	3	4	3	2	3	3	2	4	4	4	3	2	4	3	4	2	4	3	1	1	2	4	4	1
1	1	50	3	1	9	22	4	4	2	2	3	4	4	3	3	4	3	3	3	4	3	3	3	2	3	2	4	3	1	3	3	2	4	4	4	3	2	4	2	4	4	3	3	3	3	4	1	1	1
1	2	45	3	1	8	8	4	3	3	2	3	3	2	3	4	3	3	3	3	2	3	2	3	2	4	3	4	3	2	3	1	3	4	4	4	2	3	3	2	4	2	3	3	2	3	3	4	1	1
1	1	44	1	1	10	24	4	4	1	2	4	4	4	4	4	4	4	3	3	4	3	4	4	1	4	3	3	3	2	3	3	4	4	4	4	2	2	4	2	4	1	4	4	1	1	2	4	5	1
1	2	30	3	1	8	1	4	4	2	4	4	4	3	3	3	4	4	2	3	3	4	4	3	2	4	3	4	3	3	3	3	3	4	4	4	2	3	4	2	4	2	3	4	1	2	3	4	5	1
1	2	32	3	1	10	8	3	3	2	1	3	4	4	4	4	4	3	3	3	4	4	4	4	1	4	3	3	3	2	4	4	4	4	4	4	2	3	3	1	3	2	4	4	1	2	3	4	5	1
1	2	36	3	1	9	8	4	4	1	2	4	4	4	4	4	4	4	3	3	3	3	4	3	1	4	3	4	4	2	4	3	3	4	4	4	2	4	4	1	3	1	3	3	1	1	2	4	3	1
1	1	40	3	1	10	20	4	4	2	1	4	4	4	3	4	4	3	3	3	3	4	4	4	2	4	3	3	4	2	4	3	4	4	4	4	2	3	4	2	4	2	4	3	2	1	3	4	1	1
1	1	44	3	1	12	7	4	4	1	1	4	4	4	4	4	4	4	3	3	3	4	3	4	1	4	3	2	4	2	4	4	4	4	4	4	1	2	4	1	4	1	4	4	1	2	2	4	4	1
1	2	32	3	1	8	9	4	4	1	2	4	4	4	4	4	4	3	3	3	3	4	3	3	2	4	3	4	3	2	4	4	4	4	4	4	2	3	4	2	3	1	4	4	2	2	3	3	1	1
1	2	27	3	1	10	2	4	4	1	2	4	4	4	4	4	4	3	2	3	3	3	3	3	1	4	3	3	3	2	4	4	4	4	4	4	2	3	4	2	3	4	4	3	2	2	3	3	1	1
1	2	28	3	3	2	2	4	4	1	2	3	4	4	4	4	4	3	3	4	3	4	3	2	2	4	2	4	2	2	4	3	3	4	4	4	2	3	3	2	2	1	4	3	2	2	3	2	5	1
1	1	37	3	1	10	7	4	4	1	1	4	4	4	4	4	4	3	4	3	3	3	4	3	1	4	2	3	4	2	3	4	4	4	4	4	2	1	4	3	3	1	3	3	2	2	3	3	3	1
1	1	50	3	1	12	10	4	3	2	1	3	3	4	4	3	4	3	2	2	2	4	3	3	1	3	3	3	3	2	3	3	3	3	3	3	1	1	3	3	4	1	3	3	1	2	4	4	1	1
1	1	33	3	1	12	11	4	3	1	1	3	3	4	4	4	4	3	2	3	3	4	4	3	2	3	3	3	3	3	4	3	3	4	3	3	1	1	4	2	4	1	4	3	2	3	3	4	1	1
1	2	37	3	1	10	7	3	3	2	2	3	3	3	3	4	4	3	2	2	3	4	3	3	2	3	3	3	3	2	3	3	3	3	3	3	3	1	3	3	3	1	3	3	2	2	4	4	2	1
1	2	35	3	1	8	7	3	3	2	2	3	3	3	4	4	4	3	3	3	2	4	3	3	2	3	3	2	3	2	3	3	3	3	3	3	2	1	3	3	3	1	3	3	2	3	4	4	5	1
1	2	42	4	1	13	6	4	4	1	1	4	4	4	4	4	4	4	4	4	4	4	4	4	1	4	3	1	4	2	4	4	4	4	4	4	1	1	4	1	4	1	4	3	2	2	2	3	3	1
1	1	42	4	1	15	24	4	4	1	1	4	4	4	4	4	4	4	4	4	4	4	4	3	1	3	3	3	4	2	4	4	4	4	4	4	1	2	4	1	4	1	4	4	2	2	2	4	4	1
1	2	40	3	1	9	6	4	4	1	1	4	4	4	4	4	4	4	4	4	4	4	4	3	1	3	3	3	4	2	4	4	4	4	4	4	1	2	4	1	4	1	4	3	2	2	1	4	3	1
1	1	34	4	1	10	6	4	4	1	1	4	2	4	4	4	3	4	3	3	3	4	4	4	2	4	4	4	4	2	4	4	4	4	4	4	2	4	4	2	4	2	4	4	1	1	1	4	1	1
1	1	42	3	1	15	10	4	4	1	1	3	4	4	3	4	4	3	3	3	3	4	3	4	1	4	4	4	4	2	3	3	4	4	4	4	2	2	3	2	4	1	4	4	2	1	2	4	3	1
1	2	26	4	2	10	6	4	4	1	1	4	4	4	4	4	4	4	3	3	4	4	4	4	2	4	3	3	3	2	4	3	4	4	4	4	2	4	4	2	4	1	4	4	2	1	2	4	3	1
1	2	35	4	1	10	10	4	4	1	1	4	4	4	4	4	4	4	3	3	3	4	4	4	1	4	4	4	4	2	4	4	4	4	4	4	1	4	4	1	4	1	4	4	1	1	1	4	2	1
1	1	38	4	1	12	4	4	4	1	1	4	4	4	4	4	4	4	4	4	4	4	4	4	1	4	4	4	4	2	4	4	4	4	4	4	1	1	4	1	4	1	3	3	2	2	3	4	3	1
1	1	38	4	1	15	7	4	4	1	1	4	4	4	4	4	4	3	3	4	4	4	3	4	1	4	4	4	4	3	4	4	4	4	4	4	1	1	4	1	4	1	3	4	1	2	3	4	3	1
1	2	44	4	1	12	8	4	4	1	1	4	4	4	4	4	4	4	3	3	3	4	4	4	1	4	4	4	4	3	4	4	4	4	4	4	1	1	4	1	4	1	4	4	1	2	2	3	3	1
1	1	51	4	1	15	32	4	4	3	4	4	4	4	4	4	4	4	3	4	3	4	4	4	1	4	3	4	4	1	4	4	4	4	4	4	4	1	4	1	4	1	4	4	3	2	4	3	1	1
1	2	35	3	1	12	7	4	4	1	1	4	4	4	4	4	4	4	3	3	3	4	1	4	1	4	4	4	4	2	4	4	4	4	4	4	1	2	4	1	4	1	4	4	2	2	1	4	2	1
1	1	51	3	1	15	33	4	4	1	4	4	4	4	4	4	4	4	3	3	3	4	4	4	1	4	4	4	4	2	4	4	4	4	4	4	1	1	4	1	4	1	4	4	1	2	3	4	2	1
1	2	26	1	1	10	5	4	4	1	1	4	4	4	4	4	4	4	4	4	4	4	3	4	1	4	4	4	4	2	4	4	4	4	4	4	1	2	4	1	4	1	4	4	2	2	2	4	5	1
1	2	27	3	1	10	7	4	4	1	1	4	4	4	4	4	4	4	4	3	3	4	4	4	1	4	4	4	4	2	4	4	4	4	4	4	1	1	4	1	4	1	4	4	1	2	4	4	1	1
1	2	25	3	1	15	5	4	4	1	1	4	4	4	4	4	4	4	3	3	3	4	4	4	1	4	4	4	4	2	4	4	4	4	4	4	4	4	4	1	4	1	4	4	2	3	4	4	5	1
1	1	45	3	1	10	32	4	4	1	1	4	4	4	4	4	4	4	4	4	4	4	4	4	1	4	4	4	4	3	4	4	4	4	4	4	1	1	4	1	4	1	4	4	1	1	3	4	4	1
1	1	37	3	1	10	20	4	4	1	1	4	4	4	4	4	4	4	4	2	4	4	4	4	1	4	4	4	4	1	4	4	4	4	4	4	4	1	4	3	4	1	4	4	1	2	2	1	4	1
1	1	38	4	1	15	7	4	4	1	1	4	4	4	4	4	4	4	4	2	2	4	4	4	1	4	4	3	4	3	3	4	4	4	4	4	1	1	4	1	4	1	4	4	2	2	3	4	5	1
1	1	32	4	1	12	12	4	4	1	1	4	4	4	4	4	4	3	3	4	4	4	4	4	1	4	4	4	4	3	4	4	4	4	4	4	1	4	4	1	4	1	4	4	2	2	2	4	1	1
1	2	26	1	1	8	7	4	4	1	1	4	4	4	4	4	4	4	4	4	4	4	4	4	1	4	4	1	4	2	4	4	4	4	4	4	1	4	4	1	4	1	4	2	2	2	3	3	3	1
1	2	37	3	1	9	3	4	2	2	2	4	4	4	4	4	4	4	3	3	3	4	4	3	4	4	4	4	4	4	4	4	4	4	4	4	3	4	4	4	4	1	4	4	4	2	2	1	1	1
1	1	30	4	1	12	11	4	4	1	2	4	4	4	4	4	4	4	4	4	4	4	4	4	1	4	4	1	4	4	4	4	4	4	4	4	1	3	3	1	4	1	4	4	1	2	2	4	4	1
1	1	40	1	1	8	7	4	4	2	2	4	4	4	4	4	4	4	4	4	4	4	4	4	2	4	3	2	4	1	4	4	4	4	4	4	2	2	4	4	4	1	4	4	1	1	3	4	4	1
1	2	31	3	1	15	9	4	4	2	1	4	4	4	0	4	4	4	3	4	4	4	4	4	1	4	4	2	4	1	4	0	4	4	4	4	1	2	4	4	4	1	4	4	2	2	2	4	4	1
1	2	43	3	1	10	9	4	4	1	1	4	4	4	4	4	4	4	4	4	4	4	3	4	1	4	4	1	4	2	4	4	4	4	4	4	1	4	4	4	4	1	4	2	3	2	3	3	5	1
1	2	32	4	1	15	7	4	4	2	2	4	4	4	4	4	4	4	3	3	3	4	4	3	2	3	3	4	4	1	4	4	4	4	4	4	3	1	4	2	4	1	4	3	3	2	2	3	1	1
1	2	35	3	1	10	7	4	4	3	1	4	4	4	4	4	4	4	3	2	3	4	4	4	2	3	3	2	1	1	4	4	4	4	4	4	2	1	4	3	4	1	4	3	1	2	3	3	2	1
1	1	51	3	1	12	7	4	4	2	2	4	4	4	4	4	4	4	3	3	3	4	4	3	2	3	3	3	4	1	4	4	4	4	4	4	1	2	4	4	4	1	4	3	2	2	2	4	4	1
1	2	35	3	1	15	7	4	4	3	1	4	4	4	4	4	4	4	3	3	3	4	4	4	1	4	3	4	4	2	4	4	4	4	4	4	3	2	3	4	4	1	4	3	3	2	6	1	1	2
1	1	37	4	1	10	7	4	4	3	2	4	4	4	4	4	4	4	3	3	4	4	4	4	2	4	3	3	4	1	4	4	4	4	4	4	3	2	4	3	4	1	1	3	2	2	2	3	1	1
1	2	39	4	1	12	7	4	4	2	2	4	4	4	4	4	4	4	3	3	3	4	4	3	1	3	3	3	4	1	4	4	4	4	3	4	3	3	4	3	4	2	4	3	2	2	2	4	4	1
1	2	40	3	1	12	7	4	4	2	1	4	4	4	4	4	4	4	4	4	3	4	4	3	1	4	3	4	4	2	4	4	4	4	4	4	2	3	4	3	4	2	4	3	2	2	2	4	1	1
1	1	36	3	1	12	7	4	4	2	2	3	4	4	3	4	3	3	1	1	1	4	3	3	2	4	3	3	4	4	4	4	4	4	4	4	3	2	3	3	4	3	3	3	3	2	3	1	1	1
1	2	37	3	1	8	7	4	4	3	1	4	4	4	4	4	4	4	4	3	3	4	3	4	1	4	3	3	4	2	4	4	4	4	4	4	3	3	4	1	3	1	4	3	2	2	2	2	3	1
1	2	37	3	1	10	7	4	4	2	2	3	4	4	4	4	4	4	2	3	1	4	3	3	2	3	3	3	4	2	3	4	4	4	3	3	2	1	3	3	4	1	3	3	1	2	2	1	2	2
1	2	36	3	1	10	7	4	4	2	1	4	4	4	4	4	4	4	4	4	4	4	4	4	2	3	3	4	4	2	4	4	4	4	4	4	2	2	4	3	4	1	4	3	2	2	2	3	3	1
1	1	29	3	1	12	7	4	4	2	2	2	4	4	4	4	4	4	3	4	3	4	3	3	2	3	3	4	4	1	4	4	4	4	4	4	3	3	4	2	1	1	4	3	1	1	3	3	1	1
1	1	25	1	1	12	7	4	4	2	1	4	4	4	4	4	4	4	3	3	3	4	4	4	1	3	2	4	4	2	4	4	4	4	4	4	2	3	4	4	4	2	4	3	1	3	3	4	4	1
1	2	34	3	1	12	7	4	4	2	2	4	4	4	4	3	4	3	4	3	3	4	2	4	1	3	3	4	4	1	4	4	4	4	4	4	3	2	4	4	4	2	4	3	2	2	2	4	3	1
1	2	34	3	1	12	7	4	4	4	2	4	4	4	4	4	4	4	3	4	4	4	4	4	4	4	4	4	4	4	4	4	4	4	4	4	3	3	4	3	4	1	4	3	1	2	3	4	1	1
1	2	38	3	1	15	7	4	4	2	2	4	4	4	4	4	4	4	4	4	4	4	4	4	2	3	3	4	4	2	4	4	4	4	4	4	2	1	4	3	3	1	4	3	1	2	2	4	5	1
1	2	27	3	1	8	4	4	4	3	1	2	4	3	4	4	4	4	3	3	3	4	4	4	2	3	3	4	3	3	4	4	3	4	4	4	4	2	4	3	4	2	2	2	2	2	3	3	5	1
1	2	32	3	1	10	7	4	4	1	1	3	4	4	4	4	4	4	3	3	3	4	4	3	2	4	3	4	4	1	4	4	4	4	4	3	3	2	4	3	1	1	3	3	2	2	2	4	3	1
1	2	24	3	1	12	4	4	4	3	2	4	4	4	4	4	4	3	3	3	3	3	3	3	1	4	3	4	4	2	4	4	4	4	4	4	3	1	4	3	4	1	4	3	2	2	3	3	2	1
1	2	36	4	1	8	7	4	4	2	3	4	4	4	4	4	4	3	1	2	3	4	4	4	2	4	4	2	4	2	3	4	3	4	4	4	2	1	3	3	4	2	4	3	1	2	2	4	1	1
1	1	35	4	1	15	7	4	4	2	2	4	4	4	4	4	4	4	1	2	3	4	4	3	1	4	4	4	4	2	3	4	4	4	4	4	3	1	3	3	4	1	3	4	2	3	4	4	4	1
1	1	27	3	1	10	7	4	4	3	3	4	4	4	4	4	3	4	3	3	3	3	4	4	4	3	3	2	4	1	4	4	4	4	4	4	1	3	4	3	4	2	4	3	1	2	3	4	4	1
1	2	36	4	1	12	7	4	4	1	1	4	4	4	4	4	4	4	3	3	3	4	4	4	2	3	3	3	4	2	4	4	4	4	4	3	2	1	4	3	4	2	4	3	2	2	3	2	3	1
1	2	28	3	1	8	7	4	4	2	2	4	4	4	4	4	4	3	3	3	3	4	2	3	2	4	4	4	4	1	4	4	4	4	4	4	3	3	4	3	4	1	4	4	1	1	2	4	1	1
1	2	30	4	1	9	7	4	4	2	2	4	4	4	4	4	4	3	3	3	3	3	3	4	1	3	4	4	4	2	4	4	4	4	4	4	3	1	3	3	3	1	4	3	2	2	3	4	1	1
1	2	40	3	1	8	7	4	4	2	1	4	4	4	4	4	4	4	3	3	3	4	3	4	2	4	4	3	4	3	4	4	4	4	4	4	3	2	4	3	3	2	4	3	1	1	2	4	1	1
1	1	38	1	1	15	7	4	4	3	1	4	4	4	4	4	4	3	4	3	3	4	4	4	2	4	3	4	4	2	4	4	4	4	4	4	2	3	4	3	4	1	3	3	1	1	2	3	1	1
1	2	30	3	1	10	7	4	4	2	2	4	4	4	4	4	4	4	3	3	3	4	4	4	2	4	3	4	4	2	4	4	4	4	4	4	1	2	4	2	4	1	4	3	2	2	3	4	2	1
1	1	31	4	1	12	7	4	4	2	1	3	4	4	4	4	3	4	3	3	3	4	4	3	1	4	3	3	4	1	4	4	4	4	4	3	3	1	4	3	4	1	4	3	1	1	2	4	5	1
1	2	48	4	1	10	7	4	4	3	2	4	4	4	4	4	4	4	3	3	3	4	3	3	1	4	3	4	4	2	4	4	4	4	4	3	3	2	4	3	4	1	4	3	1	2	4	4	1	1
1	2	27	3	1	8	7	4	4	2	2	4	4	4	4	4	4	4	3	3	3	4	4	4	2	3	4	2	4	2	4	4	4	4	4	4	3	3	4	3	4	1	3	3	2	2	2	4	2	1
1	1	28	3	1	15	7	4	4	3	1	4	4	4	4	4	4	4	3	3	3	4	4	4	2	4	4	4	4	1	4	4	4	4	4	4	3	4	4	3	4	1	4	4	2	2	2	4	3	1
1	2	33	3	1	10	7	4	4	2	2	4	4	3	4	4	4	4	4	3	3	4	3	4	1	4	4	4	4	1	4	4	4	4	4	4	3	3	4	3	4	1	3	3	1	1	4	3	5	1
1	1	40	4	1	15	14	4	4	1	1	4	4	4	4	4	4	4	4	4	4	4	4	4	1	4	3	2	4	1	4	4	4	4	4	4	2	1	4	1	4	1	3	3	3	2	3	4	3	1
1	2	29	1	1	12	9	4	4	1	1	4	4	4	4	4	4	4	3	3	3	3	3	4	1	3	4	3	3	3	3	4	4	4	4	4	1	2	3	3	4	1	4	3	2	2	3	4	2	1
1	2	37	4	2	12	2	4	4	1	2	4	4	4	4	4	4	4	3	3	3	4	4	4	2	4	3	4	4	2	4	4	4	4	4	4	3	4	4	3	4	1	4	4	1	2	2	4	1	1
1	2	38	4	1	12	8	4	4	1	1	4	4	4	4	4	4	4	4	4	4	4	4	3	2	4	4	4	3	2	4	4	4	4	3	4	2	4	4	2	4	4	4	4	1	2	2	4	3	1
1	2	34	4	2	10	8	4	4	2	2	4	4	4	4	4	3	4	4	4	4	4	4	4	1	4	4	4	4	2	4	4	4	4	4	4	2	3	4	3	4	3	3	3	2	2	3	4	2	1
1	1	42	3	1	15	17	4	4	1	1	3	4	4	4	4	4	4	3	3	3	4	3	3	2	4	2	3	4	2	4	4	4	4	2	2	2	2	4	2	3	1	4	3	2	3	3	4	4	1
1	1	37	4	1	12	17	4	4	1	1	4	4	4	4	4	4	4	3	3	4	4	4	4	2	4	3	4	4	2	3	3	4	4	3	3	1	1	4	1	4	1	4	3	2	1	3	4	2	1
1	2	35	4	1	10	3	4	4	1	2	3	4	4	4	4	4	4	3	3	3	4	4	4	1	4	3	2	4	2	3	4	4	4	3	3	1	1	4	2	3	1	3	3	2	2	3	4	3	1
1	1	33	3	1	10	10	4	4	1	2	4	4	4	4	4	4	3	3	4	4	4	3	4	2	4	3	4	4	2	3	4	4	4	3	4	2	2	4	2	4	1	4	2	1	1	2	4	3	1
1	1	26	3	1	12	7	4	4	1	1	4	4	4	4	4	4	3	3	4	3	4	3	3	2	4	3	4	4	2	4	4	4	4	2	4	2	1	4	2	3	1	4	4	2	2	3	4	4	1
1	1	38	3	1	12	7	4	4	1	2	4	4	4	4	4	4	3	3	3	3	4	4	3	1	4	3	3	4	2	3	4	4	4	3	3	3	2	4	2	4	1	4	3	2	2	3	4	2	1
1	1	52	3	1	10	16	4	4	1	1	4	4	4	4	4	4	4	3	4	4	4	4	3	1	4	4	1	4	1	4	4	4	4	2	3	3	2	4	2	3	1	3	3	1	2	3	4	2	2
1	2	35	3	2	10	8	4	4	1	1	4	4	4	4	4	4	4	3	3	4	3	3	4	2	4	4	1	4	1	3	4	4	4	4	4	3	3	4	1	4	1	3	3	1	2	3	4	2	1
1	1	37	4	1	15	7	4	3	1	1	4	4	4	4	4	4	4	3	3	4	4	4	3	1	4	3	1	4	1	4	4	4	3	4	4	1	1	4	1	4	1	4	4	1	2	3	4	4	1
1	1	27	3	1	15	0	3	3	3	2	4	4	4	4	4	3	3	3	3	4	4	3	4	1	4	3	3	3	2	4	4	4	4	4	4	3	2	4	3	4	3	4	2	4	2	3	4	5	1
1	1	37	3	1	10	16	4	4	1	1	4	4	4	4	4	4	4	3	3	4	3	3	3	2	4	4	1	4	1	4	4	4	4	4	4	2	1	4	2	4	1	4	4	2	2	3	4	3	1
1	2	28	3	1	12	1	4	4	1	2	4	4	4	4	4	4	4	3	4	4	4	4	3	2	4	4	3	4	2	4	4	4	4	4	3	3	2	4	2	4	1	4	3	2	3	2	4	2	1
1	2	41	1	1	12	7	4	4	1	2	4	4	4	4	4	4	4	3	3	3	4	4	4	1	4	4	2	4	2	4	4	4	3	3	3	2	2	3	2	3	1	4	4	2	1	3	4	1	1
1	1	41	3	1	12	16	4	4	1	2	4	4	4	4	4	4	3	3	3	4	4	3	3	2	3	3	4	4	3	3	4	4	4	3	3	2	1	4	2	4	1	3	3	2	3	3	4	1	2
1	2	32	1	1	10	4	4	4	1	2	4	4	4	4	4	4	4	3	3	4	4	3	3	2	4	3	1	4	2	3	4	4	3	2	3	1	1	4	2	3	1	4	3	2	1	3	4	3	1
1	1	38	3	1	12	10	4	4	1	2	3	4	4	3	4	4	3	3	3	3	4	4	3	1	3	3	3	3	2	3	3	4	4	3	3	2	1	4	3	4	1	4	3	2	3	3	4	1	1
1	1	50	4	2	7	24	4	4	1	1	3	4	4	3	4	4	4	2	4	4	3	3	4	1	4	3	1	4	2	4	3	3	3	3	3	3	2	3	3	3	1	4	3	2	2	3	4	5	1
1	2	45	4	1	12	9	4	4	1	1	4	4	4	4	4	4	4	4	4	4	4	4	4	1	4	4	4	4	2	4	4	4	4	4	4	1	4	4	1	4	1	4	4	1	1	2	4	5	1
1	2	42	3	1	12	9	4	4	2	1	4	4	4	4	4	4	4	3	4	4	4	4	4	1	4	3	2	4	1	4	4	4	4	4	4	1	1	4	1	4	1	4	1	2	1	2	3	1	1
1	1	37	4	2	12	23	4	4	1	1	4	4	4	4	4	4	4	4	4	4	4	4	3	1	4	3	1	4	2	3	4	4	4	4	4	1	2	3	1	4	1	4	3	2	2	1	4	3	1
1	2	42	4	1	12	9	4	4	1	1	4	4	4	4	4	4	4	4	4	4	3	4	4	1	4	4	4	4	2	4	4	3	4	4	4	2	4	4	2	4	1	4	3	1	1	2	4	1	1
2	1	37	3	1	15	4	4	4	1	1	1	3	2	0	4	3	3	3	3	4	4	4	4	3	3	2	3	3	2	3	0	3	4	3	4	2	2	3	3	4	4	3	3	3	1	3	4	4	1
2	1	42	3	1	10	10	4	4	2	2	2	3	4	0	4	4	4	3	3	3	4	4	4	2	3	4	4	4	1	4	0	4	4	4	4	4	2	3	3	4	1	4	4	1	1	2	4	4	1
2	2	28	3	1	12	8	4	4	2	1	4	4	4	0	4	4	2	4	4	3	4	2	3	1	4	4	4	3	1	4	0	4	4	4	3	3	1	4	3	4	2	3	3	2	2	3	3	3	1
2	1	37	3	1	10	10	3	4	1	2	3	4	3	0	4	4	3	4	4	3	4	3	3	3	3	4	3	4	1	4	0	4	4	4	4	3	2	4	3	4	1	3	4	2	1	2	4	4	1
2	2	43	3	1	10	7	3	4	2	3	4	4	4	0	4	4	4	4	2	4	4	4	4	1	4	4	2	4	2	4	0	4	4	4	4	4	2	4	4	4	1	4	4	1	2	3	4	4	1
2	2	22	3	1	10	7	4	4	1	2	4	4	4	0	4	4	4	4	4	4	4	2	3	2	3	4	3	3	2	4	0	4	3	4	4	3	3	4	3	4	1	4	4	1	2	2	4	3	1
2	1	37	3	1	10	10	4	4	2	2	2	4	4	0	4	4	4	1	3	4	4	4	3	1	2	3	4	4	1	3	1	4	4	4	4	4	2	4	4	4	1	4	4	1	2	2	4	3	1
2	2	28	1	1	9	7	4	4	2	2	4	4	2	4	4	4	4	4	3	4	4	2	3	2	3	4	4	4	2	2	4	2	2	4	4	2	2	4	2	2	1	4	2	2	2	2	3	2	1
2	1	48	3	1	10	25	4	4	1	1	4	4	4	0	4	4	4	4	4	4	4	4	4	1	4	4	3	4	1	4	0	4	4	4	4	3	4	4	2	4	2	3	3	1	1	4	4	3	1
2	1	54	1	1	10	30	4	4	1	2	4	4	3	4	4	4	4	4	4	4	4	4	3	1	3	4	3	3	1	4	4	4	4	3	4	2	1	4	3	4	1	4	3	2	2	4	3	1	1
2	1	38	3	1	10	15	4	4	1	1	4	4	4	4	4	4	4	4	4	4	4	4	4	1	4	4	1	3	3	4	4	4	4	4	4	1	1	4	2	4	1	4	3	1	1	3	3	1	1
2	2	35	3	1	9	0	4	4	1	1	3	4	4	0	4	3	3	3	3	3	4	4	3	2	3	3	3	3	3	3	0	3	4	4	4	2	1	4	2	4	3	2	3	2	1	3	3	5	2
2	2	44	4	1	10	7	4	4	3	3	4	4	4	0	4	3	4	4	4	4	4	4	3	2	3	4	3	4	3	4	1	3	4	3	4	3	1	4	3	4	3	3	3	2	1	2	3	1	1
2	1	28	3	1	10	3	4	4	2	2	4	4	4	4	4	4	3	3	3	3	4	4	3	3	3	4	4	4	1	3	4	3	4	4	4	3	2	4	2	4	1	3	3	1	1	2	4	1	1
2	1	58	2	1	12	8	4	4	2	3	4	4	4	0	4	4	4	3	3	3	4	4	3	1	3	3	2	4	1	3	0	3	4	4	4	3	3	4	2	4	1	3	3	1	1	3	2	5	1
2	1	40	3	1	12	7	4	4	1	2	4	4	4	0	4	4	4	3	3	4	4	2	3	2	4	4	4	4	1	4	0	3	4	4	4	2	1	4	4	3	1	3	3	1	1	2	1	1	1
2	2	39	3	1	12	7	4	4	1	1	4	4	4	0	4	4	4	4	4	4	4	4	3	2	4	4	4	4	1	4	0	3	4	4	4	2	3	4	3	4	1	3	3	1	1	3	3	5	1
2	2	37	3	1	12	7	4	4	1	1	3	4	4	0	4	3	3	3	3	3	4	3	3	2	4	4	3	3	2	4	0	3	4	4	3	3	1	4	3	2	4	4	3	1	1	3	4	5	1
2	2	30	3	1	12	3	4	4	2	1	4	4	4	0	4	4	4	4	4	4	4	4	4	1	4	4	4	4	1	4	0	3	4	4	4	2	1	4	3	4	1	4	3	1	1	3	3	5	1
2	1	39	3	1	10	7	3	4	1	2	4	4	4	0	4	4	4	3	1	1	4	4	4	1	4	4	4	3	1	3	0	3	4	4	4	3	2	3	3	4	2	4	3	1	2	3	4	1	1
2	1	37	3	1	12	4	4	4	1	1	4	4	4	0	4	3	4	4	4	4	4	4	4	1	4	4	3	3	2	3	0	3	4	4	3	3	2	3	2	4	2	4	3	2	2	2	2	5	1
2	1	58	3	4	10	32	4	4	1	1	4	3	4	0	4	4	4	4	4	4	4	4	4	1	3	4	4	3	3	3	0	3	4	4	4	1	1	4	3	4	1	4	3	1	2	3	4	3	1
2	2	40	3	1	10	4	4	4	1	2	4	4	4	0	4	4	4	3	4	4	4	3	4	1	4	4	3	4	3	4	0	4	4	4	4	3	2	4	3	4	2	3	3	2	1	3	4	3	1
2	1	55	4	1	10	32	4	4	1	1	4	4	4	0	4	4	4	4	3	4	4	4	3	3	3	2	1	3	3	3	0	3	4	4	4	2	2	3	2	4	1	3	3	1	4	4	3	5	1
2	2	27	3	1	12	3	4	4	3	2	4	4	3	0	4	3	4	3	4	4	4	4	3	2	3	3	3	3	1	3	0	3	4	4	4	2	1	4	3	4	1	4	3	2	1	3	4	1	1
2	2	30	3	1	12	7	4	4	1	3	4	4	4	0	4	4	4	4	4	4	4	3	4	1	4	4	4	4	3	4	0	4	4	4	4	3	1	4	3	4	1	4	3	1	1	1	4	1	1
2	2	35	3	1	8	3	4	4	2	2	4	4	3	0	4	3	3	3	3	3	3	4	3	1	4	4	4	3	3	3	0	3	4	4	4	1	1	3	3	4	1	3	3	2	2	3	3	5	1
2	1	27	3	2	12	7	4	4	1	1	4	4	4	0	4	4	4	4	3	4	4	4	4	1	4	4	4	3	1	4	0	4	4	4	4	1	2	4	2	4	1	4	4	1	1	4	4	3	1
2	2	28	3	1	9	3	4	4	1	1	4	4	4	0	4	4	4	4	4	4	4	4	4	1	4	4	4	4	1	4	0	4	4	4	4	2	2	4	3	4	1	4	3	1	1	2	4	5	1
2	1	22	3	1	12	0	4	4	1	3	3	4	4	0	4	4	4	3	3	3	4	4	4	1	4	4	4	0	3	3	0	3	4	4	4	3	1	3	3	4	1	4	3	2	2	3	4	5	1
2	1	56	3	1	10	20	4	4	1	2	4	4	4	0	4	4	4	3	4	4	4	4	4	4	4	4	3	4	3	4	0	4	4	4	4	3	2	4	2	4	2	3	3	1	1	3	4	3	1
2	2	37	3	1	12	2	4	4	3	3	4	4	4	0	4	4	3	3	3	3	4	2	3	1	4	4	3	4	3	4	0	3	4	3	3	3	1	2	3	2	3	2	3	1	4	4	3	5	1
2	2	47	3	1	10	7	4	4	1	1	4	4	4	0	4	4	4	4	4	4	4	4	4	1	4	4	4	4	1	4	0	3	4	4	4	3	2	4	3	3	2	3	3	1	1	3	4	1	1
2	2	38	3	1	10	8	4	4	2	3	3	4	4	0	4	4	3	3	3	4	3	3	3	1	3	3	3	3	2	3	0	3	3	4	4	4	1	3	3	3	2	4	3	1	2	2	4	5	1
2	1	53	3	1	9	30	4	4	2	3	4	4	4	4	4	4	4	3	4	4	4	4	4	1	2	3	2	3	2	3	4	3	4	4	4	2	4	4	3	4	1	4	3	2	2	4	4	4	1
2	1	37	3	1	12	15	4	4	2	2	4	4	4	4	4	4	4	4	4	4	4	4	4	2	4	4	3	3	2	4	4	4	4	4	4	3	4	4	3	4	2	3	4	2	2	3	4	4	1
2	2	38	3	1	12	8	4	3	2	3	4	4	4	4	4	4	4	4	4	4	4	3	4	2	4	4	3	4	2	4	4	3	4	4	4	2	3	4	3	4	2	4	4	1	1	3	4	4	1
2	2	38	3	1	12	8	4	4	2	2	4	4	4	4	4	3	3	4	4	4	4	4	4	3	4	4	2	4	2	4	3	4	4	4	4	3	2	4	3	4	2	3	4	1	1	2	4	5	1
2	2	30	1	1	8	5	4	4	1	1	4	4	4	3	4	3	3	3	4	4	4	4	3	2	4	4	3	4	2	4	3	3	4	2	4	3	1	3	3	4	2	4	3	2	2	4	4	1	1
2	1	34	8	1	10	7	4	4	2	3	4	4	4	4	2	4	3	3	3	3	4	4	3	4	3	2	3	2	3	3	0	3	4	4	4	3	3	3	3	3	3	3	3	2	2	3	4	5	1
2	1	35	3	1	10	7	4	4	2	1	4	4	4	0	4	4	4	3	3	3	4	4	4	1	4	4	2	4	1	4	0	4	4	4	4	2	2	4	2	4	1	4	4	2	1	3	4	1	1
2	2	35	3	1	12	5	4	4	2	2	4	4	4	0	4	4	4	4	4	4	4	4	4	1	4	4	2	4	1	4	0	3	4	4	4	3	3	4	2	4	1	4	4	1	1	2	4	5	1
2	1	37	3	1	10	31	4	4	2	3	4	4	4	4	4	4	4	3	3	3	3	4	4	2	4	4	3	4	2	4	4	4	4	4	4	3	2	4	3	4	1	3	3	1	2	4	4	1	1
2	1	52	4	4	12	25	4	4	1	2	4	4	4	4	4	4	3	3	4	4	4	4	4	3	3	4	1	4	1	4	4	4	4	4	4	3	3	4	3	4	1	3	2	2	2	3	3	1	1
2	1	50	1	1	10	14	4	4	1	3	4	4	4	4	3	4	4	4	3	3	4	4	4	1	4	4	4	4	1	4	4	4	4	4	4	4	2	4	3	4	3	3	3	2	2	4	4	5	1
2	1	46	4	1	12	6	4	4	1	1	4	4	4	4	4	4	4	4	3	3	4	4	4	1	4	4	3	4	1	4	4	4	4	4	4	4	2	4	3	4	1	3	4	1	2	3	3	4	1
2	1	45	4	1	15	6	4	4	1	3	4	3	4	4	4	3	3	4	4	4	4	2	4	1	4	3	3	4	1	4	1	4	4	4	4	4	1	4	4	4	1	3	3	2	2	3	4	2	1
2	2	40	4	1	12	4	4	4	1	1	4	4	4	3	4	4	4	4	4	4	4	4	3	1	4	4	3	4	2	4	4	4	4	4	4	4	1	4	2	2	1	4	4	2	2	2	4	5	1
2	2	46	4	1	17	7	4	4	1	3	4	4	4	0	4	4	4	4	4	4	4	3	4	1	4	4	4	3	1	4	0	4	4	4	4	3	1	4	4	4	1	3	3	1	1	3	4	5	1
2	2	37	1	1	10	5	4	4	1	2	4	4	4	0	3	4	4	4	4	3	4	4	3	1	4	4	2	4	2	3	0	3	4	3	3	4	2	4	3	3	3	3	2	1	2	3	4	5	1
2	2	44	4	1	12	5	3	4	1	2	3	4	4	0	4	4	4	4	4	4	4	2	3	1	4	4	4	3	2	4	0	4	4	3	3	3	1	4	3	2	3	4	4	2	2	3	3	5	1
2	2	47	4	1	15	4	4	4	1	3	4	4	4	0	4	4	4	3	3	4	4	4	4	1	4	4	3	4	2	3	0	4	4	4	4	3	1	4	2	4	1	4	3	1	2	2	4	5	1
2	2	37	3	1	10	8	4	4	1	2	4	4	4	4	4	4	4	3	3	4	4	4	4	1	4	4	3	4	2	4	4	3	4	4	4	3	2	4	3	4	3	4	4	1	2	2	4	4	1
2	1	37	3	1	10	30	4	4	1	3	4	4	4	4	4	4	4	3	3	3	4	4	4	2	3	3	3	3	1	3	3	3	4	4	4	3	2	4	4	4	3	3	3	2	2	3	4	4	1
2	2	37	3	1	12	8	4	4	1	2	3	4	4	4	4	4	4	4	3	3	4	4	4	1	4	4	3	3	2	4	4	4	4	4	4	2	3	4	3	4	2	4	4	1	2	2	4	5	1
2	2	37	3	1	12	7	4	4	2	2	4	4	4	4	3	4	4	3	4	4	4	3	4	2	4	4	3	4	2	4	4	3	4	4	4	2	2	4	2	4	1	4	4	2	2	3	4	5	1
2	2	37	4	1	12	8	4	4	2	2	4	4	4	4	4	4	3	3	4	4	4	3	4	1	4	4	4	4	1	4	4	4	4	4	4	2	3	4	3	4	1	4	4	2	4	2	4	3	1
2	2	45	4	2	10	3	4	4	2	3	4	4	4	4	4	4	3	3	3	3	3	4	4	3	4	4	2	4	1	3	4	3	4	4	4	3	2	4	3	4	3	4	3	2	2	3	4	4	1
2	2	35	3	1	10	4	4	4	1	2	3	4	4	0	4	4	4	4	4	4	3	3	4	1	4	4	3	4	1	4	0	3	4	4	4	2	2	4	3	4	1	4	3	1	2	2	4	5	1
2	1	38	3	1	10	5	4	4	1	2	4	4	4	4	4	4	4	4	4	4	4	4	3	2	3	3	4	4	1	3	3	3	4	4	4	3	2	4	2	4	1	4	3	1	1	2	4	3	1
2	2	55	4	1	10	7	4	4	1	1	4	4	4	4	4	4	4	4	3	3	4	4	4	1	4	4	4	4	1	4	4	3	4	4	4	3	2	4	3	4	1	4	4	1	1	2	4	2	1
2	1	27	3	1	12	7	4	4	3	3	4	4	4	4	3	4	4	3	4	4	4	4	4	2	4	4	3	3	2	4	4	4	4	4	4	3	2	4	3	4	2	2	4	2	2	4	4	4	1
2	2	37	4	1	10	4	4	4	1	2	4	4	4	4	4	4	4	4	2	4	4	4	4	1	4	4	2	4	2	4	4	4	4	4	4	2	4	4	2	4	1	4	4	2	4	3	4	3	1
2	2	37	3	1	9	4	4	4	1	2	4	4	4	4	4	4	3	3	4	4	4	4	4	1	4	3	2	4	1	4	4	4	4	4	4	2	4	4	3	4	1	4	4	1	1	2	4	4	1
2	2	38	4	1	12	7	4	4	1	2	4	4	4	4	4	4	4	4	4	4	4	4	4	1	4	4	2	4	1	4	4	4	4	4	4	2	2	4	2	4	1	4	4	1	2	2	4	2	1
2	2	35	3	1	10	4	3	4	2	2	3	3	4	0	4	4	3	3	3	3	4	3	3	2	3	3	4	4	2	3	0	3	4	3	3	2	2	4	3	4	2	4	3	2	2	2	4	5	1
2	2	29	3	1	12	4	4	4	1	2	4	4	4	0	4	4	3	3	3	4	4	3	4	1	4	4	3	4	1	4	0	3	4	4	4	2	1	4	2	3	1	4	4	2	3	3	4	5	1
2	1	50	4	1	12	7	4	4	1	1	4	4	4	4	4	4	4	3	3	3	4	4	4	1	4	4	2	4	1	4	4	4	4	4	4	4	1	4	3	4	1	4	4	1	1	2	3	3	1
2	2	41	3	2	10	4	4	4	1	2	3	4	4	4	4	4	4	3	3	4	4	4	3	1	4	4	4	4	1	4	4	4	4	4	4	2	1	4	3	4	1	4	3	1	1	2	4	3	1
2	1	51	3	1	12	31	4	4	1	4	4	4	4	4	4	4	4	4	4	4	4	4	3	1	4	3	4	4	1	4	4	4	4	4	4	3	2	4	3	4	3	4	4	1	1	3	3	1	1
2	1	37	1	1	10	31	4	4	2	1	3	4	3	4	3	4	4	4	4	4	4	4	4	4	3	3	3	3	4	1	4	4	4	4	3	2	2	4	3	3	3	4	3	1	1	2	2	5	1
2	1	55	1	1	10	31	4	4	1	2	4	4	4	3	4	1	4	4	4	4	4	4	3	3	4	4	1	4	1	4	4	4	4	4	3	3	1	4	3	4	1	4	2	1	3	3	2	3	1
2	2	27	3	1	8	4	4	4	1	1	4	4	4	4	4	3	4	4	4	3	4	4	4	1	4	4	4	4	1	4	4	4	4	4	4	4	4	4	3	4	1	4	3	2	1	2	4	3	1
2	1	27	4	1	12	6	4	3	2	2	4	4	3	4	1	3	4	4	3	3	4	3	4	1	4	4	4	4	2	4	2	4	3	4	4	4	1	4	4	4	2	3	3	1	2	3	4	1	1
2	1	37	4	2	12	4	3	4	3	2	4	4	4	0	3	4	4	4	4	4	4	4	4	1	4	4	2	2	2	3	0	3	4	3	3	3	1	4	2	1	1	4	2	1	1	2	3	5	1
2	2	34	4	2	12	6	3	3	3	3	3	2	4	4	4	4	4	4	4	4	4	3	4	1	4	4	4	3	1	3	3	3	4	4	4	4	2	4	3	4	4	3	3	1	3	2	2	5	1
2	2	30	3	1	12	8	4	4	2	2	4	4	4	4	4	4	3	3	3	4	4	4	3	3	3	4	2	4	2	3	4	3	4	3	4	3	1	4	3	4	2	3	4	2	2	4	4	1	1
2	1	58	3	1	10	30	4	4	2	2	4	3	4	0	4	4	4	3	4	4	4	3	4	2	3	3	3	4	2	4	0	3	4	4	4	2	3	4	3	4	2	4	4	2	3	4	4	5	1
2	2	38	1	1	8	3	4	4	1	2	4	4	4	4	4	4	4	4	4	4	4	4	4	1	4	4	2	4	2	4	3	3	4	4	4	3	3	3	3	3	1	3	3	1	1	3	4	5	1
2	1	28	3	1	12	8	3	4	1	1	4	4	4	2	4	4	4	3	3	4	3	3	4	1	4	4	3	4	1	4	2	3	4	4	4	3	2	4	4	3	1	4	3	1	2	4	4	3	1
2	2	35	4	1	12	8	4	4	2	3	2	4	4	4	4	4	4	3	2	3	4	3	3	2	3	3	4	3	2	4	4	2	4	4	4	4	1	4	3	4	2	2	3	1	2	3	4	1	1
2	1	30	3	1	10	8	4	4	1	2	2	4	3	0	4	4	4	3	4	4	4	4	4	1	3	4	4	4	2	4	0	3	4	3	4	3	3	4	3	4	1	4	4	2	2	4	4	3	1
2	1	53	3	2	10	31	3	3	2	3	3	3	3	3	3	4	3	3	3	3	3	3	2	3	3	3	1	3	3	4	3	3	3	3	3	3	2	3	3	4	2	3	2	1	3	3	4	5	1
2	1	45	1	2	10	28	4	4	2	2	3	4	4	4	4	4	3	3	3	3	3	3	3	2	3	3	2	3	2	4	3	3	4	3	3	3	2	3	3	3	2	3	2	1	2	3	4	1	1
2	2	40	3	1	8	8	4	4	2	3	3	4	4	4	4	4	3	3	3	4	4	3	3	2	4	4	3	4	2	4	4	2	4	3	3	3	2	4	2	3	1	4	3	1	2	4	4	1	1
2	1	55	4	1	8	30	3	4	2	2	3	4	4	3	4	4	3	3	4	4	4	4	3	2	3	3	2	4	2	4	3	3	4	4	4	3	2	4	3	4	3	3	3	2	3	3	4	1	1
2	1	51	4	1	12	31	4	4	1	2	4	4	3	4	4	4	3	2	3	3	3	3	3	2	3	3	3	2	2	4	3	3	4	4	4	3	2	3	2	3	2	4	4	1	1	3	4	4	1
2	1	38	1	1	10	16	4	4	1	1	4	4	4	0	4	4	4	4	4	4	4	4	2	3	3	4	4	2	2	3	0	3	4	4	4	3	2	4	2	4	2	4	4	4	1	4	4	5	1
2	1	55	1	1	7	32	3	3	2	3	3	3	3	0	3	3	3	3	3	3	3	3	3	2	3	3	1	3	2	3	0	3	4	3	3	3	2	3	3	2	2	4	2	2	4	4	3	5	1
2	2	39	3	1	10	6	4	4	2	2	4	4	4	4	4	4	4	4	3	4	4	4	4	1	4	4	3	4	1	4	4	3	4	4	4	3	2	4	3	4	1	4	4	2	3	4	4	5	1
2	2	34	3	1	12	3	4	4	2	2	3	4	4	4	3	4	4	3	3	2	3	4	4	1	4	4	3	4	1	4	4	3	4	4	4	3	2	4	3	4	1	4	4	2	2	4	4	1	1
2	2	46	1	1	12	8	4	4	1	2	2	3	4	4	4	4	3	3	3	3	4	2	4	1	4	3	4	3	4	3	4	4	4	4	4	4	4	4	4	1	1	4	4	4	6	4	4	1	1
2	1	30	8	1	12	10	4	4	1	1	4	4	4	4	4	4	3	1	3	3	4	4	4	1	4	4	4	3	1	2	4	4	4	4	4	2	1	4	3	4	1	3	4	1	2	3	1	5	1
2	1	25	4	1	12	5	4	4	1	1	4	4	4	3	4	4	4	3	4	4	4	4	3	1	4	3	4	4	1	3	3	3	3	3	3	1	4	4	3	4	1	4	3	3	2	3	3	2	1
2	2	37	3	1	15	7	4	3	3	4	4	4	4	3	4	4	3	3	4	4	4	2	4	2	4	4	4	4	1	4	4	4	4	4	4	4	3	4	2	3	2	4	3	2	1	2	4	4	1
2	2	35	3	1	12	8	3	3	2	2	3	3	4	0	3	4	3	4	2	3	4	4	4	3	3	3	2	4	2	3	0	4	4	3	4	3	2	4	3	4	2	2	3	2	2	2	4	5	1
2	2	35	1	1	10	10	4	4	1	1	4	4	4	3	4	4	4	4	4	4	4	4	4	1	4	4	4	4	1	4	0	4	4	4	4	4	4	3	4	4	1	4	4	2	2	2	4	3	1
2	1	41	3	1	12	6	4	4	1	1	4	4	4	0	4	4	4	3	3	3	4	4	4	1	4	4	4	4	1	4	0	4	4	4	4	1	2	4	2	4	1	2	4	2	4	3	4	1	1
2	1	37	3	1	12	12	4	4	2	2	3	4	3	0	4	4	4	3	3	3	3	4	3	2	3	4	4	4	2	4	0	3	4	4	4	3	2	4	3	4	1	4	4	2	3	2	4	5	1
2	1	37	4	1	12	17	4	4	1	1	4	2	2	2	2	2	3	3	3	4	4	4	4	1	4	4	4	4	2	4	4	4	4	4	4	1	1	4	1	4	1	4	4	2	2	3	4	3	1
2	2	31	1	1	12	7	4	4	2	3	4	2	2	3	4	4	3	3	4	3	3	4	4	2	4	4	3	2	2	4	3	4	4	4	4	3	2	4	2	4	1	3	4	3	3	2	3	5	1
2	1	43	3	1	12	19	4	4	4	4	3	3	4	3	4	3	4	3	4	3	4	4	3	2	4	4	4	3	2	3	3	3	4	4	4	2	4	4	2	4	1	4	3	2	4	2	4	5	1
2	1	37	3	1	12	19	4	4	2	2	4	4	4	1	4	4	4	4	3	3	4	4	3	2	3	3	2	3	2	3	3	3	3	4	4	2	2	4	2	3	1	4	3	2	4	4	3	4	1
2	2	36	3	1	10	8	4	4	2	2	4	4	3	4	4	4	4	3	3	3	4	4	4	2	4	4	2	4	2	4	4	4	4	4	4	2	4	4	3	4	2	4	4	3	2	3	3	3	1
2	2	34	4	1	10	9	4	4	2	2	4	4	4	4	4	4	4	4	4	4	4	4	4	2	4	4	2	4	3	4	4	4	4	4	4	2	4	4	2	4	1	4	4	2	2	2	3	1	1
2	2	38	3	1	10	8	4	4	2	2	3	4	4	4	4	4	4	4	4	4	4	4	4	2	4	4	4	4	2	4	4	4	4	4	4	2	4	4	2	4	1	3	2	2	2	2	3	3	1
2	1	46	3	2	12	10	4	4	1	1	4	4	4	4	4	4	4	4	4	4	4	4	3	3	4	4	4	4	2	4	4	4	4	4	4	1	4	4	4	4	1	4	2	1	2	2	4	4	1
2	2	37	1	1	10	7	4	4	2	1	4	4	4	4	4	4	4	4	4	4	4	4	4	1	4	4	1	4	1	4	4	4	4	4	4	1	4	4	4	4	1	4	4	2	1	2	4	3	1
2	1	47	4	2	10	10	3	4	1	1	4	3	3	4	4	4	4	4	3	3	4	4	4	1	3	4	4	4	2	4	3	4	4	4	3	2	4	4	3	3	1	4	4	1	4	3	4	4	1
2	2	33	4	1	10	7	4	4	2	2	3	4	4	4	4	4	4	4	4	4	4	4	4	2	4	4	2	3	1	4	4	4	4	4	4	2	2	4	3	4	1	2	2	2	1	3	4	1	1
2	1	38	4	1	12	10	4	4	1	2	4	4	4	4	4	4	3	4	3	4	4	4	4	3	4	4	2	4	4	4	4	4	4	4	4	2	2	4	3	4	1	4	4	2	2	3	3	4	1
2	2	29	1	1	10	7	4	4	2	1	4	4	3	3	4	3	3	4	4	4	4	2	3	3	4	3	2	3	2	4	4	4	4	4	3	2	4	3	3	3	1	2	2	2	6	3	4	5	2
2	2	33	3	1	12	9	3	3	3	2	3	4	4	4	3	3	4	4	3	4	4	4	4	2	4	4	4	4	2	4	3	4	4	4	4	2	2	4	3	3	2	2	2	1	2	4	2	5	1
2	2	35	3	1	15	5	4	4	1	2	4	4	4	4	4	4	4	3	4	4	4	4	4	1	4	4	4	4	1	4	4	4	3	4	3	2	4	4	3	4	1	4	3	2	2	4	4	3	1
2	2	35	3	1	12	9	4	4	2	2	4	4	4	3	4	4	4	4	4	4	4	4	4	2	4	4	4	4	2	4	4	4	4	4	4	2	2	4	2	4	1	4	4	3	2	3	3	5	1
2	1	41	1	1	10	18	4	4	2	3	4	4	3	4	4	4	3	4	3	4	4	4	3	2	3	3	3	3	2	3	3	3	3	3	3	2	1	3	2	3	1	4	3	2	2	2	4	4	1
2	1	45	8	1	10	16	4	4	2	2	3	3	3	0	4	4	4	4	4	4	4	4	4	2	4	4	4	3	2	3	3	3	3	3	3	2	2	3	3	3	1	4	3	1	4	3	2	5	1
2	1	32	3	1	12	16	4	3	2	2	3	3	4	4	4	4	4	3	3	3	4	4	3	2	4	3	3	4	2	3	3	3	3	3	3	2	2	3	2	3	2	1	1	2	2	2	3	5	1
2	2	35	8	1	10	8	3	3	2	2	3	3	3	0	4	4	4	4	4	4	4	3	3	2	4	4	4	4	3	3	3	3	3	3	3	2	3	3	2	3	1	4	4	2	2	2	2	3	1
2	2	38	8	1	10	9	4	4	2	2	4	4	4	0	4	4	4	3	4	4	4	4	4	2	4	4	4	0	2	4	0	4	4	4	4	2	4	4	2	4	1	4	4	2	2	2	3	5	1
2	2	45	4	1	12	17	4	4	1	2	2	4	4	0	4	1	3	1	4	4	4	4	4	1	4	4	3	3	1	3	0	3	3	3	3	2	3	3	2	3	1	4	4	2	2	3	3	5	1
2	1	33	8	1	10	10	3	4	1	2	4	4	4	0	4	3	4	4	4	4	4	4	4	1	4	4	4	0	1	4	3	4	4	4	4	1	1	4	1	4	1	4	3	4	3	2	1	5	1
2	2	40	3	1	9	9	3	3	2	2	3	3	3	0	4	4	4	3	4	4	4	4	4	2	4	4	2	4	4	4	4	4	4	4	4	2	4	4	2	4	2	3	4	4	4	3	2	5	1
2	1	37	3	2	12	17	4	4	2	4	2	4	3	4	4	3	4	4	3	4	4	4	3	4	4	2	3	3	4	4	4	3	4	4	4	3	4	3	2	4	1	2	2	1	1	2	3	3	1
2	2	37	3	1	9	7	4	4	1	1	4	4	4	4	4	4	4	4	4	4	4	4	4	2	4	4	1	4	2	4	1	4	4	4	4	3	3	4	3	4	1	2	3	3	2	2	4	3	1
2	2	35	3	1	12	8	4	3	1	1	4	4	4	4	4	4	4	4	4	4	4	4	4	2	3	4	4	4	2	4	3	4	4	4	4	2	2	4	4	4	1	2	3	2	2	3	4	4	1
2	2	30	1	1	12	8	4	4	1	1	3	4	4	0	4	4	4	4	4	4	4	4	4	1	4	4	2	4	4	4	0	4	4	4	4	3	4	4	4	4	2	4	2	1	2	3	3	4	1
2	1	40	4	1	12	17	2	4	2	2	4	3	4	0	4	4	4	4	4	4	4	4	4	2	4	3	1	3	1	4	0	4	4	4	4	2	2	4	4	4	1	4	4	2	2	2	4	4	1
2	1	37	1	1	12	16	4	4	1	2	4	4	4	4	4	4	4	4	4	4	4	4	4	2	4	4	4	4	2	4	4	4	4	4	4	4	4	4	4	4	1	4	4	2	2	4	3	3	1
2	1	37	8	1	15	17	4	4	1	1	4	4	4	0	4	4	4	4	4	4	4	4	3	3	4	4	4	3	2	4	0	4	4	4	4	2	1	4	2	4	1	4	3	1	4	4	4	3	1
2	2	42	8	1	12	8	4	4	2	2	4	4	4	4	4	4	4	4	4	4	4	4	4	2	4	4	4	4	2	4	4	4	4	4	4	2	4	4	2	4	1	4	4	1	2	2	3	5	1
2	2	36	1	1	10	11	4	4	2	2	4	4	4	0	4	4	4	3	4	4	4	4	4	2	4	4	4	0	2	4	0	4	4	4	4	2	2	4	2	4	2	4	4	2	1	3	3	5	1
2	2	34	3	1	12	8	3	3	2	2	4	4	4	4	4	4	4	4	4	4	4	4	4	2	4	4	4	4	2	4	4	4	4	4	4	2	4	4	2	4	1	4	4	1	1	2	4	5	1
2	1	37	4	1	12	4	4	3	2	3	4	4	4	4	4	3	3	4	3	3	4	4	3	2	3	4	3	3	2	3	3	3	4	4	4	2	1	3	3	4	2	4	4	6	4	4	3	5	1
2	1	37	4	1	10	10	4	4	1	4	4	4	4	4	4	3	4	4	3	4	4	4	4	1	3	4	2	4	1	4	4	4	4	4	4	2	2	4	2	4	1	3	4	2	4	4	2	5	1
2	1	37	3	1	15	11	4	4	1	2	3	4	4	4	4	4	3	3	3	3	4	4	3	1	4	2	3	4	2	4	3	4	4	4	4	2	1	4	1	4	1	4	3	2	3	3	3	1	1
2	1	34	4	1	15	11	4	3	1	3	4	4	2	3	3	3	4	4	4	4	4	4	4	1	4	4	4	3	1	4	4	4	4	4	3	2	1	4	2	3	2	4	4	2	2	3	4	5	1
2	1	35	4	1	10	10	4	3	3	3	4	3	4	3	4	4	4	4	4	4	4	4	4	2	3	3	3	2	3	3	3	3	3	3	3	2	2	3	2	3	1	4	4	1	2	3	3	3	1
2	2	28	8	1	12	9	3	3	2	2	4	4	3	4	4	3	4	3	3	3	4	4	4	2	4	3	4	3	2	4	4	4	4	4	4	2	2	4	2	4	2	3	3	2	2	3	4	5	1
2	2	32	8	1	10	9	3	4	2	2	4	3	3	4	4	3	4	3	3	4	4	4	4	2	4	4	4	4	2	4	4	4	4	4	3	2	2	4	2	4	2	1	3	2	2	3	3	5	1
2	2	31	1	1	8	2	4	4	1	2	4	4	3	0	4	4	4	3	3	4	4	4	3	1	4	3	4	4	1	4	0	4	4	4	4	1	2	3	2	3	2	3	4	3	1	3	4	5	1
2	1	40	4	1	15	15	3	4	3	2	3	4	4	4	4	4	4	3	4	3	4	1	4	1	4	2	4	4	2	4	4	4	4	4	4	2	1	4	4	4	2	3	4	2	2	2	4	3	1
2	2	38	3	1	12	0	3	4	3	3	3	4	3	0	4	3	3	3	3	4	4	3	4	1	4	3	4	4	3	4	0	4	4	4	4	4	3	4	3	4	2	3	4	2	1	4	4	2	1
2	2	32	3	2	10	0	3	4	3	3	3	4	3	0	4	4	3	3	3	3	4	3	4	1	4	2	4	4	2	4	0	4	4	4	4	2	3	4	3	4	3	4	4	3	2	4	3	5	1
2	2	32	4	1	14	7	4	4	1	2	3	4	4	4	4	4	4	1	3	3	4	4	4	1	4	4	3	4	2	4	4	4	4	4	4	2	1	4	2	4	1	4	4	1	1	2	4	3	1
2	1	35	4	1	12	7	4	4	1	2	4	3	4	0	4	4	3	3	3	4	4	4	4	2	4	3	4	3	2	4	0	3	4	4	4	2	1	4	3	4	2	4	4	3	3	4	2	1	1
2	1	37	4	1	15	7	4	4	1	1	3	4	3	4	3	4	4	2	2	4	4	4	4	1	4	4	4	3	1	4	4	2	4	4	3	2	1	4	2	4	1	3	3	1	2	4	4	4	1
2	2	45	3	1	12	7	4	4	1	1	4	4	4	0	4	3	3	2	3	3	4	4	3	1	4	3	4	4	1	3	0	3	4	4	4	2	1	3	4	4	1	3	3	1	1	3	4	4	1
2	1	22	3	1	10	7	4	4	2	2	4	4	3	4	4	4	3	2	2	3	4	4	3	2	3	2	3	3	2	3	3	3	4	4	4	3	1	3	2	3	1	4	3	1	2	4	4	1	1
2	1	34	3	1	15	7	4	4	2	3	3	3	3	4	4	4	4	2	3	3	4	4	3	2	3	4	4	3	2	4	4	3	4	4	4	3	1	4	2	2	1	3	3	1	1	3	4	1	1
2	1	31	3	1	15	7	3	4	2	4	3	3	3	4	4	3	3	2	2	4	4	4	4	2	4	4	4	4	2	3	4	3	4	4	3	3	1	3	3	3	1	3	4	2	2	4	4	1	1
2	1	29	3	1	12	7	4	4	2	3	3	3	4	4	4	4	3	2	3	3	4	4	3	1	4	4	4	4	1	3	3	4	4	4	4	3	1	3	2	4	1	4	4	2	2	3	4	3	1
2	2	34	3	1	12	1	4	4	2	3	3	3	4	4	4	3	3	2	1	2	4	4	3	2	3	3	4	3	3	3	3	3	4	4	4	3	1	3	3	3	2	4	4	1	2	2	4	1	1
2	2	25	3	1	15	7	4	4	2	2	3	3	4	4	4	3	3	1	2	3	4	3	3	1	4	3	4	4	3	3	3	4	4	4	4	3	1	4	2	3	2	3	4	1	2	3	4	5	1
2	1	31	3	1	12	7	4	4	2	3	3	3	4	4	4	4	4	2	3	4	4	4	3	2	3	3	2	4	1	3	4	3	4	4	4	2	1	3	2	4	1	4	3	2	1	3	4	1	1
2	2	35	3	1	12	7	4	4	2	2	4	4	3	4	4	4	3	3	3	4	4	4	3	1	4	3	4	4	1	3	3	4	4	4	3	2	1	3	2	4	1	4	3	2	2	3	4	1	1
2	2	33	3	1	12	7	4	4	2	2	4	4	4	4	4	4	3	3	3	3	4	4	3	2	3	3	4	3	3	4	4	4	4	3	4	4	3	4	3	3	2	4	3	2	2	4	4	2	1
2	1	37	3	1	12	7	4	4	3	4	4	4	3	4	4	4	3	3	2	4	4	4	3	1	4	3	2	4	1	4	4	4	4	4	4	1	3	4	2	4	1	4	4	2	2	3	4	2	1
2	1	45	3	1	12	7	4	4	4	1	4	4	4	4	4	4	4	3	3	4	4	4	4	2	4	3	2	4	2	4	4	4	4	4	4	1	1	4	2	3	4	4	4	2	2	3	4	5	1
2	2	24	2	1	10	7	4	4	2	2	4	4	3	4	4	4	3	3	3	4	3	3	4	2	4	3	2	4	1	4	4	4	4	4	4	2	1	4	3	4	2	3	4	2	2	4	4	5	1
2	1	37	3	1	10	7	3	3	3	3	4	4	3	4	4	3	4	3	4	4	4	3	3	2	4	3	2	4	2	4	4	4	4	4	4	3	2	4	2	3	2	3	3	4	3	4	1	5	1
2	1	37	3	1	10	7	4	4	1	1	4	4	3	4	4	4	3	3	3	4	4	4	3	2	4	3	3	4	2	4	4	4	4	4	4	2	2	4	2	4	1	3	4	2	2	4	4	5	1
2	1	27	3	1	12	7	4	4	1	2	4	4	4	4	4	4	3	3	3	4	3	4	3	1	4	3	4	4	2	4	4	4	4	4	4	3	2	4	3	4	3	3	4	2	3	3	4	1	1
2	2	30	3	1	12	8	4	4	1	2	4	4	4	4	4	4	4	4	4	4	3	4	4	1	4	3	4	4	1	4	4	4	4	4	4	1	1	4	2	4	1	4	3	2	2	3	4	1	1
2	1	29	3	2	12	7	4	4	2	2	4	3	4	4	4	4	3	2	2	3	3	4	2	1	4	3	4	4	2	4	4	4	4	4	4	2	1	4	2	4	1	3	3	1	2	3	4	4	1
2	2	26	1	1	9	8	4	4	1	2	4	4	4	4	4	4	3	3	3	3	4	4	4	2	4	3	3	4	1	4	4	4	4	4	4	2	1	4	2	4	2	3	4	2	1	3	4	5	1
2	2	32	3	1	12	7	4	4	3	1	3	4	4	4	4	4	3	3	3	3	3	3	3	1	4	3	4	4	1	4	4	4	4	4	4	1	1	3	3	4	2	3	4	3	2	4	4	2	1
2	2	27	4	1	12	7	3	4	1	2	4	4	3	4	4	4	4	3	4	4	4	3	4	1	4	2	3	4	1	4	4	4	4	4	4	2	2	3	3	3	2	3	3	5	2	3	4	5	1
2	2	27	3	1	12	7	4	4	2	2	4	4	4	4	4	4	4	4	3	4	4	3	3	1	4	3	4	4	1	4	4	4	4	4	4	2	1	4	3	3	1	4	4	2	2	3	4	1	1
2	2	40	3	1	10	7	4	4	2	2	4	4	3	4	4	4	3	3	3	3	3	3	3	1	4	3	3	4	1	4	4	4	4	4	4	2	2	4	3	4	2	4	4	4	2	4	4	5	1
2	2	26	3	1	18	8	4	4	3	3	4	4	3	3	4	4	3	4	3	4	4	2	3	1	4	3	4	4	1	4	4	4	4	4	4	2	1	4	3	3	2	3	4	2	3	3	2	5	1
2	1	35	3	1	15	7	4	4	2	1	4	4	4	0	4	4	4	4	4	4	4	3	4	1	4	3	4	4	1	4	0	4	4	4	4	2	1	4	3	4	1	3	4	2	2	4	4	1	1
2	1	34	3	1	12	2	4	4	1	1	4	4	3	0	3	3	3	3	3	4	4	3	4	1	4	3	3	4	1	4	0	4	4	4	4	2	1	3	3	4	1	4	4	2	2	6	3	1	1
2	1	41	4	2	12	3	4	4	3	3	3	4	4	0	4	4	4	3	3	3	4	3	3	2	4	2	4	4	1	4	0	4	4	4	4	2	2	4	3	4	1	4	3	2	2	4	4	5	1
2	2	35	3	1	10	2	4	4	1	1	4	4	3	0	4	4	4	4	4	4	4	1	3	1	4	3	4	4	1	4	0	4	4	4	4	2	1	4	3	3	4	4	4	2	2	3	4	2	1
2	2	41	4	1	12	2	3	3	2	2	3	4	4	0	4	4	3	2	1	3	4	3	3	1	4	3	4	4	1	4	0	4	4	4	4	2	1	3	3	3	2	3	3	2	2	3	4	5	1
2	2	35	3	1	9	3	4	4	1	1	1	4	4	0	4	4	4	3	3	4	4	2	3	2	4	2	4	4	3	4	0	4	4	4	4	3	2	4	3	3	2	3	4	2	4	4	4	5	1
2	2	34	3	1	15	2	4	4	2	2	4	4	4	0	4	4	4	3	3	4	4	4	4	1	4	3	3	4	1	4	0	4	4	4	4	2	2	4	3	4	2	4	4	1	2	2	4	2	1
2	1	28	4	1	12	8	4	4	2	2	4	4	3	0	4	4	4	3	3	4	3	2	3	1	4	3	3	4	1	4	0	4	4	4	4	2	1	3	2	4	2	3	4	2	2	4	3	5	1
2	2	49	4	2	15	0	4	4	4	2	3	4	4	0	3	3	3	3	3	3	3	3	4	1	4	3	4	4	1	4	0	4	4	4	4	3	3	4	3	3	2	3	4	2	2	3	3	5	1
2	2	28	3	1	11	7	4	2	3	3	3	3	4	0	4	3	4	3	3	3	4	4	3	3	3	3	4	3	2	4	3	3	4	4	4	3	2	3	3	3	1	3	2	1	2	3	4	5	1
2	1	32	3	1	15	7	4	4	2	3	3	4	3	3	4	3	3	3	3	3	4	3	4	1	4	3	4	3	2	4	3	3	4	4	2	2	1	3	3	4	2	4	4	2	2	4	4	5	1
2	1	35	3	1	15	2	3	4	2	2	4	4	3	0	4	4	3	3	2	4	4	1	3	3	4	3	4	4	1	4	0	4	4	4	4	2	1	3	3	3	2	3	4	2	3	4	4	5	1
2	1	39	4	1	12	2	4	4	1	2	4	4	4	0	4	4	3	3	3	3	3	4	3	1	4	3	2	4	1	4	0	4	4	4	4	2	2	3	2	4	2	3	4	1	2	4	4	5	1
2	1	41	3	1	12	7	4	4	2	2	2	3	3	3	4	4	4	2	2	3	4	3	3	4	3	3	4	3	3	3	3	3	3	3	4	4	3	4	4	4	3	4	3	2	2	3	4	5	1
2	1	35	3	1	15	7	4	4	4	4	4	4	4	4	4	4	4	4	3	4	2	4	4	1	4	4	4	4	2	4	4	4	4	4	4	2	4	4	1	4	1	4	4	1	2	3	3	3	1
2	2	37	3	1	9	7	3	3	2	2	3	3	4	3	4	4	4	3	3	4	4	2	2	2	4	4	4	4	1	4	4	4	4	4	4	1	3	4	3	4	4	4	4	2	2	3	3	1	1
2	1	37	1	1	12	7	4	4	3	2	3	4	3	3	4	4	4	3	3	3	3	3	4	3	4	4	3	4	1	3	4	4	4	4	3	2	2	4	3	4	3	3	3	2	4	4	2	5	1
2	1	42	3	1	12	7	4	4	4	4	4	4	4	4	4	4	3	2	3	3	3	3	4	2	3	3	3	4	2	4	4	4	4	4	4	1	1	4	3	4	3	4	3	2	2	3	2	3	1
2	2	40	3	1	12	7	3	4	4	2	4	4	2	4	4	3	3	2	3	3	3	3	3	1	2	3	4	4	2	4	4	4	4	4	4	3	3	4	2	4	2	3	3	2	2	2	3	2	1
2	2	30	4	1	12	8	4	4	4	2	4	4	3	4	4	4	3	3	3	3	4	3	4	1	4	4	4	4	2	4	4	4	4	4	4	4	3	4	2	4	4	4	3	2	1	3	4	2	1
2	2	27	3	1	12	7	3	4	1	2	2	4	4	3	4	4	4	3	3	4	3	2	3	1	4	3	3	2	1	4	2	4	4	4	4	3	1	4	4	4	2	4	4	1	1	2	4	3	1
2	1	40	3	1	12	7	4	4	1	2	3	4	4	4	4	4	4	3	3	4	4	4	3	1	4	3	4	4	2	4	4	4	4	4	3	3	3	4	2	4	3	4	4	2	2	4	4	4	1
2	1	37	3	1	12	7	4	4	2	2	2	4	3	3	4	4	3	3	3	3	3	3	3	2	4	3	4	4	2	4	4	4	4	4	4	3	3	4	2	4	2	4	3	1	2	3	4	4	1
2	2	37	3	1	12	8	4	4	3	2	4	4	3	3	4	4	3	3	3	4	3	3	4	2	4	3	4	4	2	4	4	4	4	4	4	2	1	4	2	3	3	3	4	2	2	4	3	3	1
2	1	45	3	1	12	8	4	4	2	3	3	4	4	4	4	3	3	3	3	4	3	4	3	2	4	3	4	4	1	4	4	4	4	4	4	2	2	4	3	4	3	3	3	2	3	2	3	2	1
2	1	24	1	1	10	8	4	4	2	2	3	4	3	3	4	4	4	3	2	3	2	3	2	2	4	3	4	4	1	4	4	4	4	4	4	2	2	3	2	4	2	3	3	2	4	4	4	1	1
2	2	37	3	1	12	7	4	4	2	2	4	4	4	3	4	4	3	2	2	4	3	3	3	2	4	3	4	4	1	4	4	4	4	4	4	2	1	4	2	4	2	3	4	2	1	3	4	3	1
2	1	37	3	1	10	7	4	4	2	2	3	4	3	4	4	4	3	2	3	3	4	4	3	2	4	3	2	4	1	4	4	4	4	4	4	2	1	4	4	4	2	4	4	1	2	2	4	3	1
2	2	47	3	1	9	8	4	4	2	4	4	4	4	4	4	4	3	3	2	4	4	3	4	1	4	3	3	4	1	4	4	4	4	4	4	2	2	4	3	4	2	4	4	1	1	2	4	3	1
2	1	29	3	1	10	7	4	4	1	2	4	4	4	4	4	4	4	3	2	4	4	4	4	1	4	4	4	4	1	4	4	4	4	4	4	1	1	4	2	4	4	4	4	1	2	3	4	3	1
2	2	37	3	1	12	8	4	4	1	2	4	4	3	4	4	4	3	2	3	4	4	3	3	1	4	3	1	4	1	4	4	4	4	4	4	2	1	4	2	4	1	4	4	2	2	3	4	1	1
2	2	45	3	1	10	9	4	4	3	2	3	4	4	4	4	4	4	3	3	3	3	2	4	4	4	3	4	4	1	4	4	4	4	4	4	2	1	4	3	2	1	4	4	2	2	2	4	5	1
2	2	37	3	1	15	1	4	4	2	2	4	4	3	4	4	4	3	4	4	4	4	4	3	2	3	3	3	3	2	3	4	4	4	4	3	2	4	3	2	4	1	4	3	2	2	2	4	5	1
2	1	37	4	1	15	17	4	4	4	1	3	4	3	4	3	4	3	3	3	4	4	3	4	2	4	3	4	3	1	4	4	4	4	3	3	2	2	3	2	3	1	4	2	1	2	2	4	1	1
2	2	43	4	1	12	7	3	2	3	4	3	4	3	4	4	3	3	3	3	3	3	4	4	3	4	4	2	4	2	4	4	4	4	2	3	4	1	3	3	3	1	1	4	2	2	3	4	5	2
2	2	36	4	1	10	7	2	1	3	3	3	4	1	3	3	3	3	3	3	1	3	3	2	4	3	4	3	4	3	4	3	3	4	2	3	3	1	4	2	3	3	2	2	3	4	2	2	5	1
2	1	30	3	1	14	7	3	3	3	3	4	4	3	4	4	3	3	3	3	3	3	4	3	2	3	4	3	4	3	4	3	3	4	3	4	3	1	4	3	4	2	3	3	2	3	3	3	5	1
2	2	42	4	1	12	7	3	3	2	4	2	4	1	4	4	1	4	3	4	4	4	4	4	1	4	3	4	4	3	4	3	4	4	2	4	3	1	4	3	4	2	1	3	2	2	2	4	5	1
2	1	30	3	1	12	3	4	3	2	2	3	4	4	4	4	4	4	3	3	4	4	3	4	2	4	4	3	4	3	4	3	3	4	3	3	2	1	4	2	4	1	4	4	2	2	4	4	5	3
2	1	46	4	1	15	17	3	3	3	3	3	4	3	3	4	3	4	3	3	3	4	3	3	1	3	3	2	3	2	3	3	3	4	4	4	3	1	3	2	4	2	3	3	1	2	4	4	2	1
2	1	30	3	1	10	7	4	4	1	1	1	4	4	4	4	4	4	3	3	4	4	3	4	1	4	4	4	4	3	4	4	4	4	4	4	1	1	4	1	4	4	4	4	1	1	2	4	4	1
2	1	37	3	1	12	11	4	4	1	1	4	4	4	4	4	4	3	3	3	3	4	4	4	1	4	4	4	4	1	4	4	4	4	4	4	1	3	4	1	4	1	4	4	1	2	4	4	3	1
2	2	31	3	1	8	4	4	4	1	1	4	4	4	4	4	4	3	3	3	3	3	3	4	1	4	4	2	4	4	4	4	4	4	4	4	1	4	4	1	4	4	4	4	2	1	3	4	3	1
2	1	37	3	1	10	10	4	4	1	2	3	4	3	0	4	3	3	3	4	4	4	4	4	1	4	3	4	4	3	4	0	4	4	4	4	2	1	4	2	4	2	3	4	1	2	2	4	1	1
2	2	39	3	1	12	10	4	4	1	1	3	4	4	0	4	4	4	3	4	4	4	4	4	1	4	4	4	4	2	4	0	4	4	4	4	1	1	4	1	4	1	3	4	1	1	2	4	2	1
2	2	32	3	1	10	1	4	4	2	2	3	4	3	0	3	3	3	3	3	4	4	4	4	1	4	3	2	4	2	4	0	4	4	4	4	4	3	4	1	4	1	3	4	2	2	3	4	1	1
2	1	35	3	1	15	15	4	4	2	3	3	4	3	0	3	3	3	3	3	4	4	4	4	1	4	4	4	4	2	4	0	4	4	4	4	2	2	4	2	4	1	3	4	1	2	3	4	3	1
2	1	27	3	1	10	7	4	4	2	2	3	4	4	0	4	4	3	3	3	3	4	4	4	1	4	4	1	4	3	4	0	4	4	4	4	2	3	4	1	4	2	4	2	1	2	4	4	4	1
2	2	29	3	1	10	8	4	3	3	4	3	4	3	0	3	3	3	3	3	3	4	4	4	1	4	3	4	4	3	4	0	4	4	4	4	3	2	4	2	4	2	3	4	2	1	4	4	5	1
2	2	38	4	1	10	1	3	4	2	3	3	4	3	0	4	3	4	3	3	4	4	4	4	1	4	4	1	4	2	4	0	4	4	4	4	2	1	4	4	4	2	3	4	6	4	4	4	5	1
2	2	29	3	1	10	7	4	4	3	3	2	4	3	0	3	3	3	3	3	4	4	2	4	2	4	2	4	4	3	4	0	4	4	4	4	3	1	4	3	4	2	4	4	2	2	4	2	1	1
2	2	33	3	3	12	8	3	3	3	4	1	4	2	0	2	3	3	3	3	3	4	1	4	1	4	3	4	4	1	4	0	4	4	4	4	2	1	4	4	4	3	1	3	4	4	4	3	5	1
2	2	42	3	1	12	8	4	4	1	3	3	4	2	0	3	3	4	3	3	3	3	1	3	1	4	3	4	4	3	4	0	4	4	4	4	4	1	4	4	4	2	3	4	4	2	3	3	1	1
2	1	44	3	1	10	17	4	4	1	3	3	4	4	0	3	3	4	3	3	3	4	4	4	1	4	3	4	4	2	4	0	4	4	4	4	2	1	4	4	4	1	3	4	2	2	4	4	1	1
2	2	27	4	1	12	3	4	4	1	2	4	4	4	4	4	4	3	3	4	4	4	4	4	1	4	4	4	1	2	4	4	4	4	4	4	1	1	4	1	4	1	4	4	2	2	2	4	4	1
2	1	46	3	1	15	18	3	3	3	3	4	4	4	4	3	4	3	3	4	4	4	4	3	2	3	4	4	3	2	4	3	3	4	4	4	3	2	3	2	4	1	3	3	2	3	3	4	4	1
2	2	39	4	1	12	5	4	3	3	3	3	4	4	4	4	3	3	3	4	4	4	4	4	2	3	3	4	3	2	3	4	3	4	3	3	2	2	4	2	3	2	2	3	2	2	3	4	3	1
2	1	37	1	1	10	7	3	4	2	3	4	3	4	4	3	3	4	3	3	4	4	4	3	2	4	3	2	3	2	4	4	4	4	3	3	2	2	3	2	4	2	1	2	2	4	3	4	4	1
2	2	42	3	1	8	2	3	3	3	3	3	4	4	2	3	3	3	3	3	4	4	3	3	2	3	3	4	3	3	3	3	3	3	3	3	3	1	3	2	3	2	3	2	2	2	3	4	4	1
2	2	29	3	1	12	2	4	3	2	4	3	4	4	4	4	4	3	3	3	4	4	4	3	2	2	3	4	3	2	3	4	3	4	3	4	3	1	4	2	4	1	4	2	2	2	3	3	3	1
2	2	43	3	1	12	2	4	4	2	3	4	4	4	4	4	4	4	2	4	4	4	2	3	2	3	3	4	2	3	4	4	4	4	4	4	3	1	3	3	2	1	4	2	1	2	4	4	5	1
2	1	38	3	1	10	17	4	3	2	2	3	4	3	4	4	4	3	3	3	3	4	4	4	2	4	4	4	4	2	4	3	3	4	2	4	2	4	4	3	4	2	4	4	2	2	2	3	5	1
2	2	40	4	1	12	2	4	3	1	2	4	4	3	4	4	4	3	3	3	4	4	3	3	2	4	3	3	2	3	4	4	4	3	3	3	2	1	3	3	4	1	3	4	2	2	4	4	5	1
2	2	42	4	1	15	2	3	3	3	3	4	4	4	4	3	4	4	3	3	4	4	4	3	2	3	3	4	2	3	3	3	3	4	4	4	3	2	3	2	2	2	3	3	2	4	2	4	5	1
2	2	38	4	1	12	5	3	3	2	3	4	4	3	3	4	3	4	2	3	4	4	4	4	2	3	3	4	3	2	4	4	3	4	3	3	3	1	3	2	3	1	2	2	2	2	3	4	5	1
2	1	50	4	2	10	17	4	4	1	2	3	4	3	4	4	3	4	3	4	4	4	4	3	2	3	3	1	3	2	3	3	3	3	4	4	3	1	3	2	4	1	3	2	1	2	3	4	4	1
2	1	50	4	2	10	17	3	4	2	2	4	4	4	2	3	4	3	3	3	4	4	3	3	2	3	4	1	1	3	3	4	4	4	4	4	2	1	4	3	4	1	3	2	3	2	4	3	5	1
2	2	36	1	1	2	6	4	4	1	3	4	4	4	4	4	4	3	3	3	3	4	3	4	2	3	4	2	2	3	3	4	4	3	4	4	2	4	4	2	4	1	3	2	2	2	3	4	5	1
2	1	28	3	1	12	4	4	4	2	2	4	4	4	4	4	3	3	3	3	4	4	4	4	2	3	3	4	2	2	4	4	4	4	4	3	4	1	4	2	4	2	4	3	2	2	3	3	5	1
2	1	29	3	1	10	7	4	4	2	2	4	4	4	4	4	4	4	3	4	4	3	4	4	1	4	3	3	2	1	4	4	4	4	4	4	1	1	4	2	3	1	4	3	1	2	3	4	5	1
2	2	36	4	1	12	5	3	3	3	2	4	4	4	4	4	4	4	3	4	4	4	4	4	1	4	4	4	3	3	4	4	4	4	4	3	3	2	4	3	2	2	3	2	2	2	4	4	2	1
2	1	47	4	2	15	18	4	4	2	3	4	3	3	4	4	4	3	2	3	4	4	4	3	1	4	4	4	4	4	4	4	4	3	3	4	2	2	4	2	4	1	3	2	1	1	4	4	4	1
2	1	45	4	1	17	17	4	4	2	3	4	4	4	4	4	4	4	2	4	4	4	4	3	2	3	3	1	2	2	3	4	4	4	4	4	3	2	3	2	3	2	4	3	2	2	2	4	4	1
2	2	37	3	1	12	2	4	4	2	3	4	4	4	4	4	4	3	3	4	4	4	3	3	2	4	4	4	3	2	4	4	4	4	4	4	3	1	3	3	3	2	4	2	1	2	3	4	4	1
2	1	39	4	1	13	6	4	4	2	1	4	4	4	4	4	4	3	2	4	4	4	4	4	1	4	4	4	4	1	4	4	4	4	4	4	1	1	4	2	4	1	4	4	2	2	4	4	5	1
2	1	39	4	1	15	7	4	4	1	1	4	4	4	4	4	4	3	4	4	4	4	4	4	1	4	4	4	4	1	4	4	4	4	4	4	1	1	4	1	4	1	4	4	2	2	2	4	3	1
2	2	46	4	1	8	8	4	4	1	1	4	4	4	3	4	4	3	3	4	4	3	4	4	1	4	4	3	4	1	4	4	4	4	4	4	1	2	4	1	4	1	4	4	1	1	2	4	2	1
2	1	37	3	1	12	17	4	4	2	1	4	4	4	4	4	4	3	3	3	4	4	4	4	1	4	4	4	4	4	4	4	4	4	4	4	1	1	3	1	4	4	4	4	1	2	2	4	5	1
2	2	27	4	1	12	8	4	4	1	1	4	4	4	4	4	4	4	3	4	4	4	4	4	1	4	4	4	4	2	4	4	4	4	4	4	1	3	4	1	4	1	4	4	2	2	4	4	3	1
2	2	37	4	2	10	8	4	4	1	3	3	4	4	4	4	3	3	3	4	4	4	3	4	1	4	4	4	4	3	4	4	4	4	4	4	1	3	4	1	4	1	4	4	2	1	3	4	1	1
2	2	48	4	1	12	9	3	4	3	3	2	4	3	4	4	4	4	3	3	3	3	1	4	1	4	4	4	4	3	4	4	4	4	4	4	2	1	4	3	4	2	3	4	2	2	3	4	5	1
2	2	35	4	1	10	6	3	4	3	2	3	4	4	4	4	3	3	3	3	3	4	3	4	1	4	4	1	4	2	4	4	4	4	4	4	2	2	4	4	4	1	4	4	2	1	4	4	3	1
2	1	41	3	1	17	16	4	4	1	4	4	4	4	4	4	4	4	4	4	4	4	4	4	1	4	4	4	4	2	4	4	4	4	3	4	3	2	4	2	4	1	4	4	1	2	3	4	4	1
2	1	26	3	1	15	8	4	4	4	4	4	4	4	4	4	4	3	3	4	4	3	4	4	2	4	3	4	4	4	4	4	4	4	4	4	2	2	4	2	4	1	4	4	1	2	4	4	2	1
2	2	33	3	1	15	8	4	3	3	3	3	4	3	3	4	3	3	3	3	4	4	2	4	1	3	4	4	4	4	4	3	4	4	4	4	3	2	4	2	3	2	2	2	2	1	2	4	3	1
2	2	35	4	1	12	7	4	3	2	2	4	4	4	4	4	4	4	3	3	3	4	4	4	1	4	4	4	4	3	4	4	3	4	3	4	2	1	3	3	3	1	3	4	2	2	2	4	5	1
2	1	46	4	1	17	7	4	4	1	1	4	4	4	4	4	4	3	3	3	3	4	4	4	1	4	3	4	4	3	4	4	3	4	3	4	2	3	4	2	3	1	4	4	2	2	2	3	5	1
2	2	29	1	1	12	1	3	3	3	3	3	4	3	4	4	3	3	3	3	3	3	4	3	2	4	4	4	4	2	4	3	3	4	2	4	2	3	4	3	4	2	4	4	2	2	2	4	5	1
2	2	40	3	1	10	2	3	3	2	2	3	4	3	4	4	4	4	3	3	3	4	4	4	1	4	4	3	4	3	4	4	4	4	2	4	2	3	4	3	4	1	4	4	3	2	2	4	5	1
2	2	37	4	1	12	7	4	3	2	1	3	4	4	4	4	4	3	3	3	3	4	4	4	2	4	4	3	4	3	4	4	3	4	3	3	3	1	4	3	4	2	4	4	2	2	2	4	5	1
2	1	37	3	1	15	16	4	4	3	2	3	4	4	4	4	4	4	3	3	4	4	3	3	1	2	3	4	4	2	4	4	3	4	2	4	3	1	3	2	4	2	4	4	2	2	2	4	3	1
2	1	37	3	1	12	17	4	4	2	2	4	4	4	4	4	4	4	3	4	4	4	4	4	2	4	4	4	4	2	4	4	4	4	3	4	2	3	4	2	4	1	4	4	2	2	2	4	5	1
2	1	37	3	1	15	6	4	4	2	2	3	4	4	4	4	4	3	3	3	3	4	4	4	2	4	4	4	4	2	4	4	4	4	2	4	2	1	4	3	4	2	4	3	2	3	2	4	5	1
2	2	38	3	1	12	8	4	4	1	2	4	4	4	4	4	3	4	3	3	3	4	4	4	1	4	4	4	4	2	3	3	3	4	4	4	2	1	4	3	4	2	3	4	2	1	4	4	4	1
2	2	40	3	1	15	6	2	2	3	3	3	3	2	2	3	3	3	3	3	3	4	1	4	1	4	3	4	3	3	4	3	4	4	4	4	3	1	4	3	3	2	3	4	4	6	4	1	5	1
2	1	38	4	1	12	15	4	4	2	2	3	4	3	3	3	3	3	3	3	4	3	3	4	2	4	3	1	4	1	4	3	4	4	4	4	2	1	4	2	4	1	4	4	2	2	3	3	1	1
2	1	26	3	1	12	0	4	4	2	3	3	4	3	4	4	4	3	3	3	3	4	3	4	1	4	3	3	4	3	4	4	4	4	4	4	2	3	4	2	4	2	3	4	2	2	4	3	5	1
2	2	37	4	1	10	5	2	3	3	3	2	4	3	3	4	3	3	3	3	4	3	3	3	2	4	3	4	4	2	4	3	4	4	4	4	3	3	4	2	4	2	2	4	2	2	2	3	1	1
2	1	36	4	1	12	16	3	3	3	3	3	4	3	3	4	3	3	3	3	4	4	4	4	1	4	3	4	3	3	4	3	4	4	4	4	3	1	4	3	4	2	3	4	2	2	2	4	4	1
2	1	28	3	1	15	7	3	4	3	3	3	4	3	3	3	3	3	3	4	4	3	3	4	1	4	3	4	4	3	4	4	4	4	4	4	2	1	4	3	3	1	3	4	2	2	2	4	1	1
2	2	28	3	1	12	2	4	4	4	3	3	4	4	4	4	4	3	3	3	3	4	1	4	1	4	3	4	4	3	4	4	4	4	4	4	2	1	4	3	4	2	4	4	2	2	2	4	5	1
2	2	29	3	1	15	2	4	4	3	3	3	4	4	4	4	3	3	2	4	3	4	3	4	1	4	3	4	4	2	4	4	4	4	4	4	3	1	4	3	4	2	3	4	4	4	4	1	1	1
2	2	40	3	1	8	5	4	4	3	3	3	4	3	3	3	3	3	3	4	4	3	3	4	2	4	3	3	4	2	4	3	4	4	4	4	2	2	4	2	4	2	3	4	2	1	2	4	1	1
2	2	36	4	1	10	5	4	3	3	2	3	4	3	4	4	4	3	3	3	3	3	4	3	2	4	4	4	4	3	3	4	3	4	2	3	2	3	4	3	3	2	3	4	2	2	3	4	5	1
2	1	48	3	1	10	17	4	3	2	2	3	4	3	4	4	4	3	3	3	4	4	4	4	2	4	4	3	4	2	4	3	3	4	2	4	3	2	4	3	4	1	4	4	2	3	4	4	5	1
2	2	39	4	1	12	6	3	4	2	3	3	4	3	3	4	3	3	3	3	4	4	2	4	1	4	3	4	4	3	4	4	4	4	4	4	2	1	4	2	3	2	3	4	2	2	2	4	3	1
2	1	40	3	1	15	17	4	4	2	2	3	4	4	3	4	3	3	3	3	3	4	4	4	2	4	3	4	4	3	4	4	4	4	4	4	3	1	4	3	4	2	4	4	3	3	3	4	5	1
2	2	46	4	2	10	7	3	3	2	2	3	3	3	4	4	4	2	2	2	2	3	3	3	2	3	2	4	1	2	3	3	3	3	2	3	4	1	3	3	3	2	3	3	2	3	3	3	1	1
2	1	48	4	1	15	18	4	4	1	4	4	3	4	4	4	4	4	3	3	4	4	4	3	1	3	4	2	2	1	4	4	4	4	4	4	2	1	3	2	1	1	4	2	1	3	3	4	5	1
2	2	37	1	1	10	7	4	4	1	1	3	4	3	4	3	4	3	4	3	4	3	3	4	2	3	4	3	3	2	3	3	4	4	3	3	2	1	4	2	4	2	2	2	2	1	3	1	5	1
2	1	36	3	1	15	14	4	4	1	1	4	4	4	4	4	4	4	4	4	4	4	4	4	1	4	4	3	4	1	4	4	4	4	3	4	1	1	4	4	4	1	4	4	1	1	3	4	5	1
2	2	37	3	1	15	8	4	4	1	2	4	4	4	4	4	4	4	3	3	4	4	4	4	1	4	4	3	3	1	4	4	4	4	1	3	2	4	4	3	4	1	4	4	1	1	2	3	5	1
2	1	29	3	1	15	14	4	4	1	1	4	4	4	4	4	4	4	4	4	4	4	4	4	2	4	4	2	4	2	4	4	4	4	4	4	1	1	4	1	4	1	4	4	2	1	4	4	4	1
2	2	37	3	1	12	4	4	3	2	2	3	4	4	4	3	3	2	3	1	4	3	4	3	1	4	4	4	4	4	4	4	4	4	4	4	2	4	4	4	4	2	4	4	2	1	2	4	1	1
2	2	37	3	1	12	4	4	4	1	4	3	4	4	4	3	3	4	3	3	3	4	4	4	1	4	3	3	3	2	4	4	4	4	4	3	2	4	4	1	3	1	3	2	2	1	3	4	3	1
2	1	31	4	1	12	19	4	4	2	1	4	3	4	4	4	3	4	4	3	3	4	3	4	2	4	3	3	4	1	3	4	4	4	4	4	1	3	4	1	4	1	4	1	1	2	2	4	4	1
2	1	37	3	1	14	17	3	4	1	1	3	4	3	4	4	4	3	3	3	3	4	4	4	1	4	4	4	3	1	4	3	4	4	4	4	2	2	3	3	2	1	4	2	2	1	3	4	5	1
2	2	30	3	2	10	5	4	4	1	3	4	4	2	3	4	2	4	3	4	3	4	3	4	1	4	4	4	3	2	4	3	3	4	4	4	3	4	4	3	4	2	3	3	1	3	2	3	5	1
2	1	42	3	1	12	10	4	4	2	2	4	4	4	4	4	4	4	3	3	4	4	4	4	2	4	4	4	4	1	4	4	4	4	4	4	2	2	4	1	4	1	4	2	2	1	2	4	3	1
2	2	37	1	1	9	7	4	4	1	2	4	4	4	4	4	4	3	3	3	4	4	4	3	2	4	4	4	3	4	4	4	4	4	4	4	1	1	4	1	3	2	3	4	1	2	2	4	5	1
2	1	37	3	1	12	10	4	4	1	2	4	4	3	4	4	4	4	3	3	3	4	4	4	1	3	4	3	4	1	4	3	3	4	4	4	3	1	4	3	4	2	2	3	2	2	4	4	2	1
2	2	35	1	1	8	7	4	4	2	2	4	4	4	4	4	4	4	3	3	4	4	4	4	1	4	4	2	3	2	3	4	4	3	4	4	3	4	4	3	4	1	2	1	2	1	3	4	5	1
2	2	37	3	1	15	3	4	4	2	1	4	4	4	4	4	4	4	3	3	3	4	4	4	1	4	4	4	4	1	4	4	4	4	4	4	2	3	4	1	3	1	4	4	2	2	3	4	3	1
2	1	33	3	1	12	10	3	3	2	2	4	4	4	4	3	3	4	3	3	3	4	4	4	2	3	4	4	3	3	4	4	4	4	4	4	4	1	4	3	4	1	3	3	1	1	2	4	5	1
2	1	37	1	2	12	16	4	4	1	1	1	4	4	4	4	4	4	3	4	4	4	4	4	1	4	4	4	4	1	4	4	4	4	4	4	1	1	4	1	4	1	4	4	1	1	2	4	3	1
2	1	37	3	1	12	12	4	4	3	3	4	4	4	4	4	4	4	3	4	4	4	3	4	2	4	3	4	4	1	4	4	4	4	4	3	3	2	4	2	3	2	4	4	2	3	4	4	2	1
2	2	34	3	1	10	8	4	4	2	4	4	4	4	3	3	4	4	3	4	4	4	4	3	1	3	4	2	2	2	3	3	4	4	4	4	3	4	4	1	4	2	4	3	1	2	2	4	3	1
2	1	45	3	1	10	18	4	3	2	2	3	4	3	3	4	3	2	2	4	2	4	2	4	2	2	2	2	2	2	4	3	3	4	4	4	3	1	4	3	2	2	3	2	2	1	4	4	2	1
2	2	34	3	1	15	8	4	3	1	2	4	4	4	4	4	4	4	3	3	4	4	4	4	1	3	3	4	4	1	4	4	4	4	4	4	3	1	4	1	4	1	4	2	2	2	3	4	4	1
2	2	30	3	1	8	8	4	3	1	1	4	3	4	4	4	3	3	3	4	4	4	4	3	2	4	4	4	4	2	4	4	4	4	4	3	4	1	4	1	4	1	4	4	2	2	3	4	5	1
2	2	37	3	1	12	7	4	3	1	1	4	4	4	4	4	4	4	3	4	4	4	4	4	2	4	4	4	4	1	4	4	4	4	4	4	1	2	4	2	3	1	4	4	2	1	2	4	5	1
2	2	41	4	1	12	8	4	3	2	3	3	4	4	4	4	4	4	3	4	4	4	4	3	1	3	3	4	4	3	4	4	4	3	4	4	3	2	4	2	3	1	2	2	2	2	3	3	3	1
2	1	41	3	1	10	7	4	3	3	4	4	4	4	4	4	3	4	3	3	3	4	4	4	1	4	4	2	4	2	4	4	4	4	4	4	3	2	3	2	4	2	3	3	1	2	3	4	5	1
2	2	30	3	1	15	3	4	3	3	3	3	4	4	4	4	4	3	3	3	4	4	4	4	1	4	3	4	4	1	4	4	3	3	4	4	3	2	3	2	3	2	2	2	2	2	3	3	5	1
2	2	41	1	1	10	6	4	4	1	2	4	4	4	4	4	4	4	3	3	4	4	4	4	1	4	4	3	3	1	4	4	4	4	3	4	2	3	4	2	4	1	2	3	1	1	2	4	5	1
2	1	38	3	1	10	17	4	4	1	1	4	4	4	4	4	4	4	4	4	4	4	4	4	1	4	4	4	4	1	4	4	4	4	2	4	2	3	4	2	4	1	4	4	1	2	2	4	5	1
2	2	38	4	1	12	1	4	3	2	2	4	4	4	4	4	2	4	3	3	3	4	4	4	2	4	4	4	4	3	4	4	4	4	3	4	2	2	4	3	4	2	4	4	2	2	2	4	5	1
2	1	46	3	1	10	8	4	4	1	1	4	4	4	4	4	4	4	3	3	3	4	4	4	1	3	3	4	3	3	4	3	4	4	2	3	3	2	4	2	4	2	4	4	2	2	2	4	5	1
2	1	26	1	1	12	6	4	4	2	4	4	4	4	4	3	4	4	4	4	4	4	4	4	2	4	4	2	4	2	4	4	4	4	2	4	2	1	4	2	4	1	2	4	2	2	4	4	5	1
2	2	39	4	1	10	5	4	4	1	2	4	4	4	4	4	4	4	3	3	3	4	4	4	1	4	4	3	4	3	4	4	4	4	4	4	2	2	4	2	4	1	4	4	2	2	3	4	5	1
2	2	35	1	1	8	2	3	3	2	2	3	4	3	4	4	4	3	3	3	3	4	4	3	2	4	4	4	4	2	3	3	4	4	2	4	2	3	4	2	4	2	2	3	3	3	4	3	5	1
2	1	32	3	1	10	3	4	4	2	2	4	4	4	4	4	4	4	3	4	4	4	3	3	2	4	4	2	4	2	3	3	4	4	2	4	2	2	4	3	4	1	4	4	2	3	3	2	5	1
2	2	37	3	1	8	4	4	4	1	1	4	4	4	3	4	4	3	3	3	4	4	4	3	2	4	4	4	3	2	3	3	4	4	3	4	2	4	4	3	4	2	2	2	3	2	4	2	5	1
2	2	32	4	1	10	5	3	3	2	2	3	4	4	3	4	4	3	3	3	3	3	4	3	2	2	4	2	3	3	3	3	3	4	3	3	2	3	4	3	4	2	2	2	3	6	2	3	5	1
2	1	37	2	1	12	17	4	4	2	4	4	4	4	4	4	2	3	3	3	2	4	2	4	2	4	4	4	4	2	4	4	4	4	2	4	3	2	4	2	4	1	4	3	4	3	2	2	5	1
2	2	28	4	1	8	8	3	3	2	2	3	4	4	4	4	4	3	3	3	3	4	4	3	2	3	4	3	4	2	3	3	3	4	3	4	2	4	4	3	4	2	3	4	2	3	3	4	2	1
2	2	34	1	1	10	1	4	4	1	2	3	4	3	3	4	4	3	3	3	4	4	4	3	2	3	4	3	3	3	3	3	4	4	3	4	2	3	4	2	4	1	3	4	2	3	3	4	5	1
2	1	45	1	1	7	22	4	4	3	1	4	4	4	4	4	4	2	1	4	4	4	4	4	2	4	4	1	4	1	4	0	4	4	4	4	1	1	4	1	4	1	4	3	1	2	4	4	2	1
2	2	35	4	1	12	9	4	4	1	3	4	4	4	4	4	4	1	3	4	4	4	3	2	1	4	3	4	4	4	4	4	4	4	4	4	1	4	4	1	4	3	4	3	2	2	3	2	3	1
2	2	30	4	1	10	5	4	4	1	1	4	4	4	4	4	4	4	3	4	4	4	3	4	1	4	4	4	3	3	4	4	4	4	4	4	4	1	4	1	4	1	4	4	1	2	2	4	1	1
2	1	50	4	1	10	23	4	4	1	2	4	4	4	4	4	4	3	2	2	4	4	2	3	2	4	2	4	4	1	4	4	4	4	4	4	4	1	4	3	4	3	4	4	3	4	4	3	1	1
2	1	46	3	1	10	24	4	4	1	1	4	4	4	4	4	4	4	4	4	4	4	4	4	1	4	3	4	4	3	4	4	4	4	4	4	4	2	4	1	4	1	4	4	2	2	3	4	3	1
2	2	38	4	2	10	7	4	4	1	1	4	4	4	4	4	3	4	4	4	4	4	4	4	1	4	4	4	4	3	4	4	3	4	4	4	1	3	4	1	4	1	4	4	2	1	2	4	5	1
2	2	40	4	1	12	9	4	4	4	4	4	4	4	4	4	4	4	4	4	4	4	4	4	1	4	4	4	4	1	4	4	4	4	4	4	4	4	4	1	4	3	4	4	2	2	2	3	5	1
2	1	46	4	1	15	7	4	4	1	1	4	4	4	4	4	4	4	3	3	4	4	3	4	1	4	4	4	4	2	4	4	4	4	4	4	1	1	4	1	4	1	4	4	2	2	3	4	5	1
2	2	32	4	1	10	3	4	4	1	1	4	4	4	4	4	4	4	4	4	4	4	4	4	1	4	4	4	4	3	4	4	4	4	4	4	1	3	4	1	4	1	4	4	1	2	2	4	3	1
2	1	37	3	1	15	6	3	4	2	2	3	4	4	4	4	3	3	3	3	3	3	4	4	2	4	3	4	4	1	4	4	4	4	4	4	3	2	4	2	4	2	4	4	1	1	2	4	1	1
2	2	32	4	1	12	3	3	4	2	1	4	4	4	4	4	4	4	2	2	3	4	4	4	1	4	4	2	4	1	4	4	4	4	4	4	1	3	4	1	4	1	4	4	1	1	2	4	3	1
2	2	46	4	1	10	8	4	4	1	2	4	4	4	4	4	3	3	3	3	3	3	4	4	1	3	4	3	4	1	4	4	4	4	4	4	1	2	4	1	4	2	4	4	1	1	2	4	1	1
2	2	37	4	1	12	9	4	4	1	1	4	4	4	4	4	4	3	3	3	2	4	4	3	2	4	4	1	4	3	4	4	4	4	4	4	1	2	4	4	2	1	4	2	1	1	2	4	1	1
2	1	49	4	1	12	24	4	4	1	1	4	4	4	4	4	4	4	3	3	3	3	4	4	3	4	4	1	4	1	4	4	4	4	4	4	1	2	4	1	4	1	4	4	1	1	2	4	3	1
2	2	39	4	1	12	9	4	4	1	1	4	4	4	4	4	4	3	2	2	3	3	1	4	2	4	4	4	4	2	4	4	4	4	4	4	1	4	4	1	2	1	4	4	1	4	2	4	5	1
2	1	48	4	1	15	24	4	4	1	3	4	4	4	4	4	4	3	3	3	3	4	2	4	1	4	4	3	4	2	4	4	4	4	4	4	2	1	4	2	4	1	4	4	1	1	3	4	1	1
2	1	42	4	1	15	24	4	4	1	1	2	4	4	4	4	3	3	3	3	2	4	3	4	1	4	4	4	4	2	4	4	4	4	4	4	2	1	4	3	4	2	4	2	3	1	3	4	1	1
2	2	35	4	1	10	2	4	4	1	1	4	4	4	4	4	4	4	4	3	3	4	4	4	2	4	4	1	4	2	4	4	4	4	4	4	1	4	4	1	4	1	4	4	1	1	2	4	2	1
2	1	50	1	1	10	25	4	4	1	1	4	4	4	4	4	4	3	3	3	3	3	4	4	1	4	4	4	4	2	4	4	4	4	4	4	1	4	4	1	4	1	4	2	1	1	2	4	5	1
2	1	27	1	1	15	1	4	4	1	1	4	4	4	0	4	4	4	3	2	3	3	4	3	1	4	4	4	4	2	4	0	4	4	4	4	2	1	4	3	4	2	2	2	2	1	4	4	5	1
2	1	45	4	1	15	12	4	4	2	1	4	4	4	4	4	4	4	1	4	4	4	4	4	1	4	4	4	4	2	3	4	4	4	4	3	4	1	4	4	4	1	3	3	2	1	2	4	5	1
2	2	44	4	2	10	18	4	4	2	1	4	4	4	4	4	4	4	4	4	4	4	4	4	3	3	4	4	4	1	3	3	4	4	3	4	2	4	4	3	4	4	4	4	2	2	2	2	1	1
2	2	43	4	1	15	9	4	4	1	1	1	3	4	4	4	4	4	3	4	4	4	4	4	1	3	4	4	4	3	4	4	4	4	3	3	2	3	4	2	4	1	4	4	1	2	1	4	4	1
2	2	42	4	1	15	9	4	4	1	2	4	4	4	4	4	4	4	3	4	3	4	4	4	2	4	3	4	4	1	4	4	4	4	3	3	3	4	4	2	3	2	4	3	1	1	1	4	4	1
2	2	36	3	1	15	8	4	4	1	1	4	4	4	4	4	4	3	3	2	3	3	4	4	2	4	4	4	4	1	4	4	4	4	4	4	1	2	4	1	4	1	2	4	1	2	2	4	2	1
2	1	49	1	1	10	24	4	4	1	1	4	4	4	4	4	4	3	3	3	3	3	4	4	2	4	4	1	4	2	4	4	4	4	4	4	1	4	4	2	4	1	4	4	2	1	2	4	2	1
2	1	44	3	1	10	22	3	3	2	2	3	3	3	3	3	3	3	2	2	3	4	3	3	2	3	3	3	3	2	3	3	3	3	3	3	3	1	3	2	3	1	2	2	2	3	3	4	5	1
2	1	44	3	1	12	1	4	3	2	2	3	3	4	4	4	4	3	2	3	3	4	4	4	1	3	3	1	3	1	4	3	3	4	4	4	2	1	3	2	4	1	3	3	2	2	3	4	5	1
2	1	27	3	1	12	5	4	4	1	1	4	4	4	4	4	4	3	3	3	3	4	4	4	2	4	3	4	3	2	4	3	3	4	3	3	2	2	3	2	3	1	3	3	2	2	4	4	1	1
2	1	28	3	1	15	0	4	4	2	2	3	4	4	4	4	4	4	3	4	4	4	3	3	1	4	4	4	4	2	3	3	2	4	3	4	3	2	4	3	4	1	4	4	1	2	3	4	5	1
2	2	34	3	1	10	8	4	4	1	1	4	4	4	4	4	4	3	1	4	4	3	3	2	1	4	4	4	4	2	4	4	4	4	4	4	4	2	4	1	4	3	3	3	2	3	2	4	5	1
2	2	25	3	1	12	2	4	4	1	1	4	4	4	4	4	4	4	4	4	4	4	4	4	1	4	4	4	4	4	4	4	4	4	4	4	1	2	4	1	4	4	4	4	1	1	3	4	5	1
2	2	30	1	1	10	8	4	4	1	1	4	4	4	4	4	4	4	4	4	4	4	4	4	1	4	4	1	4	3	4	4	4	4	4	4	1	1	4	1	4	1	4	3	1	2	1	4	4	1
2	2	33	1	1	12	8	4	4	1	1	4	3	4	4	4	4	4	4	4	4	4	4	4	1	4	2	4	4	3	4	4	4	4	4	4	1	4	4	1	4	1	4	4	1	1	2	4	5	1
2	2	38	4	1	12	6	4	4	1	1	3	4	4	4	4	3	2	2	3	4	3	3	4	1	4	4	4	3	3	4	4	4	4	4	4	3	1	3	3	4	1	4	4	2	2	2	4	5	1
2	1	22	1	1	10	0	4	4	1	1	4	4	4	4	4	4	4	3	4	4	4	4	2	2	4	3	4	3	2	4	4	4	4	4	4	1	2	3	1	4	1	4	1	2	1	4	4	5	1
2	2	30	3	1	10	9	4	4	2	2	4	4	4	4	4	4	4	4	4	4	3	4	4	2	4	4	2	4	2	4	4	3	4	4	4	3	2	4	3	4	1	4	4	1	1	2	4	4	1
2	1	48	3	1	12	24	4	4	1	1	4	4	4	4	4	4	4	2	4	4	4	4	4	1	4	4	4	4	1	4	4	4	4	4	4	1	2	4	1	4	1	4	4	1	1	2	4	4	1
2	1	36	1	1	12	0	4	4	1	1	4	4	4	4	4	4	4	4	4	4	3	2	4	1	4	3	3	4	2	4	4	4	4	4	4	1	1	3	2	4	3	4	2	2	1	2	4	5	1
2	1	42	3	1	10	24	4	4	1	1	4	4	4	4	4	4	4	3	4	3	4	4	3	1	4	2	4	4	2	4	4	4	4	4	4	1	1	4	1	4	1	4	4	1	2	4	4	4	1
2	1	54	3	1	10	25	3	4	2	2	4	4	4	4	4	4	4	3	3	3	3	4	3	2	4	3	2	3	1	4	3	3	4	3	4	2	3	3	3	4	1	4	3	2	3	3	3	5	1
2	1	36	3	1	10	7	3	3	3	2	3	3	3	3	3	3	3	3	3	1	3	3	3	3	3	3	3	3	2	2	3	3	3	3	3	3	1	3	2	4	1	2	2	3	3	4	2	5	1
2	2	30	3	1	12	8	4	3	3	3	3	3	3	3	3	3	4	3	3	3	4	3	3	2	3	3	4	3	2	4	2	3	3	3	3	3	1	3	3	3	1	2	4	2	3	3	4	5	1
2	1	30	3	1	10	7	4	4	4	4	4	4	4	4	4	4	4	3	3	3	4	4	3	2	3	4	4	3	2	3	3	3	4	3	3	3	1	3	3	4	1	3	4	2	2	2	3	1	1
2	1	30	3	1	10	7	3	4	2	4	4	4	4	4	4	4	3	3	3	3	4	4	3	2	4	4	2	3	1	4	4	4	4	3	3	2	2	4	3	4	1	4	4	2	3	4	2	2	1
2	2	35	3	1	12	5	3	3	2	2	3	3	3	4	4	4	4	3	3	4	4	3	3	2	3	3	2	3	2	3	3	3	3	3	3	3	1	3	3	3	1	3	3	2	3	2	3	5	1
2	1	29	3	1	14	7	3	3	2	2	3	3	3	3	4	4	3	3	2	3	4	3	3	2	3	3	3	3	2	3	3	3	3	3	3	3	1	3	2	3	1	4	3	2	3	4	3	1	1
2	1	37	3	2	12	7	4	4	1	2	3	3	4	3	3	3	3	3	3	3	3	2	2	2	3	2	3	3	2	3	3	3	4	3	3	2	2	3	4	3	2	2	1	4	4	3	1	5	1
2	2	32	4	1	15	8	4	4	1	1	4	4	4	4	4	4	4	3	4	4	4	3	4	1	4	1	4	4	3	4	4	4	4	4	4	1	1	4	1	4	1	4	4	1	4	2	4	5	1
2	2	26	4	1	15	7	4	4	1	1	4	4	4	4	4	4	3	4	4	4	4	4	4	1	4	4	3	4	2	4	4	4	4	4	4	3	1	4	1	4	1	4	3	1	4	2	4	5	1
2	2	44	4	1	12	8	4	4	4	1	4	4	4	4	4	4	4	3	4	4	3	4	4	1	4	4	4	4	2	4	4	4	4	4	4	1	1	4	4	3	4	4	3	1	2	2	4	2	1
2	1	37	3	1	12	10	4	4	1	1	4	4	4	4	4	4	4	2	4	4	4	4	4	2	4	4	4	4	2	4	4	4	4	4	4	1	2	4	3	4	2	4	4	2	2	2	4	1	1
2	2	31	4	1	10	3	4	4	1	3	4	4	4	4	4	4	4	4	4	4	4	4	4	1	4	3	1	4	1	4	4	4	4	4	4	1	1	4	1	4	1	4	3	3	4	2	4	1	1
2	2	40	1	1	10	6	4	4	1	1	4	4	4	4	4	4	4	4	4	4	4	4	4	4	4	4	1	3	1	4	4	4	4	4	4	1	4	4	3	4	2	4	4	1	2	2	4	4	1
2	1	35	3	1	10	25	4	4	1	1	4	4	4	4	4	4	4	4	3	3	4	4	4	1	3	4	4	1	1	4	3	4	4	4	4	1	3	4	1	4	2	4	4	2	1	3	4	1	1
2	1	37	3	1	10	24	4	4	4	3	4	4	4	4	4	4	4	4	4	4	4	3	4	2	4	4	4	1	4	4	4	4	4	4	4	2	1	4	3	4	2	1	2	5	1	5	1	5	1
2	2	46	1	1	8	7	4	4	1	2	4	4	4	4	4	4	4	4	4	4	4	4	4	4	4	4	1	3	1	4	4	4	4	4	4	2	4	4	1	4	1	4	2	1	1	2	4	4	1
2	2	37	3	1	10	9	4	4	2	3	3	4	4	4	4	4	3	3	3	3	4	4	3	4	4	4	2	3	1	4	4	4	4	4	4	2	2	4	1	4	1	4	4	1	3	2	4	4	1
2	2	37	3	1	10	9	4	4	1	1	4	4	4	4	4	4	3	3	3	4	4	2	4	1	4	4	4	3	4	4	2	4	4	4	4	1	4	4	2	2	1	4	4	2	1	3	4	3	1
2	1	39	4	1	12	7	4	3	2	3	3	3	3	3	3	4	3	3	3	3	4	2	2	3	3	3	3	1	1	3	3	4	4	3	3	3	1	3	3	4	1	4	3	1	2	4	4	5	1
2	1	40	4	1	10	7	4	4	1	2	3	4	3	4	3	4	4	3	3	4	4	3	3	3	3	3	3	3	2	3	3	3	3	3	3	3	1	4	2	4	1	2	2	1	4	3	4	3	1
2	2	34	4	1	10	7	4	3	2	2	3	3	3	4	4	4	4	3	3	4	4	2	3	2	3	4	3	1	1	3	3	4	3	3	3	3	1	4	2	3	1	3	3	2	2	2	4	5	1
2	2	35	4	1	12	7	4	3	2	2	3	3	3	4	4	4	3	3	3	3	4	2	4	2	3	3	4	1	2	3	3	3	4	3	3	3	1	3	2	4	1	1	3	2	4	2	4	5	1
2	1	38	4	1	10	8	4	4	1	1	3	4	4	4	4	4	3	3	3	3	3	4	3	3	3	4	3	4	1	4	4	4	4	4	4	1	1	4	1	4	1	4	2	1	2	4	3	1	1
2	2	28	3	1	10	1	4	4	1	1	4	4	4	4	4	4	4	3	3	3	3	4	4	1	4	3	4	4	2	3	4	4	4	4	4	2	4	4	1	4	1	3	4	1	1	3	4	5	1
2	1	37	4	1	17	10	4	4	1	2	4	4	4	4	4	3	4	2	2	2	1	3	4	2	4	4	4	4	2	3	4	4	4	4	3	2	1	4	2	4	1	2	4	2	5	3	4	5	1
2	1	42	4	1	10	24	4	4	1	4	4	4	4	4	4	4	4	4	4	4	4	4	4	1	4	3	1	4	1	4	4	4	4	4	4	1	1	4	1	4	1	4	4	2	1	4	4	3	1
2	2	36	4	1	10	8	4	4	1	1	4	4	4	4	4	4	3	3	4	4	4	4	4	1	4	4	4	4	1	4	4	4	4	4	4	2	1	4	1	4	1	4	4	2	2	2	3	3	1
2	1	30	4	1	10	24	4	4	1	1	4	4	4	4	4	4	4	4	4	4	4	4	4	1	4	4	4	4	1	4	4	4	4	4	4	1	1	4	2	4	1	4	4	3	2	3	4	1	1
2	2	35	3	1	12	9	4	4	1	1	4	4	4	4	4	4	4	4	4	4	4	4	4	1	4	2	4	4	1	4	4	4	4	4	4	1	4	4	1	1	2	4	4	2	2	2	3	5	1
2	1	48	3	1	15	7	4	4	1	1	4	4	4	4	4	4	4	2	4	4	4	4	4	1	4	3	1	4	3	4	4	4	4	4	4	3	1	4	1	4	1	4	3	3	2	4	2	1	1
2	2	37	4	1	12	8	4	4	1	1	4	4	4	4	4	4	4	3	4	4	4	4	4	1	4	4	4	4	3	4	4	4	4	4	4	3	4	4	1	4	1	4	4	2	2	3	4	1	1
2	1	44	3	1	10	24	4	4	4	3	4	4	3	4	4	3	4	4	4	4	4	4	4	1	4	4	1	4	1	4	4	4	4	4	4	1	1	4	1	4	2	4	4	4	1	1	4	5	1
2	2	39	4	1	12	8	4	4	2	1	4	4	4	4	4	4	3	3	3	4	3	4	4	1	4	2	4	4	3	4	4	4	4	4	4	1	2	4	1	4	1	4	4	2	4	1	4	5	1
2	1	37	1	1	9	24	4	4	1	1	4	4	4	4	4	4	4	3	4	4	4	4	4	1	4	4	1	4	2	4	4	4	4	4	4	1	1	4	1	4	1	4	4	2	1	2	4	3	1
2	1	37	4	1	12	24	4	4	1	1	4	4	4	4	4	4	4	4	4	3	4	4	3	1	4	1	1	4	2	4	4	4	4	4	4	3	1	4	1	4	1	4	3	2	1	3	4	1	1
2	2	37	4	1	10	8	4	4	1	1	4	4	4	4	4	4	4	3	4	4	4	3	4	1	4	1	4	4	1	4	4	4	4	4	4	1	4	4	1	4	1	4	4	2	2	4	4	1	1
2	2	37	2	1	10	8	4	4	1	1	4	4	4	4	4	4	3	3	4	4	3	4	4	1	4	4	4	4	1	4	4	4	4	4	4	1	4	4	1	4	1	4	4	2	2	3	4	4	1
2	1	26	3	1	10	17	4	4	1	1	4	4	4	4	4	4	4	4	4	1	4	4	4	1	4	4	1	4	1	4	4	4	4	4	4	1	1	4	4	4	1	4	4	2	2	3	4	3	1
2	2	37	2	1	8	3	4	4	1	1	4	4	4	4	4	4	4	4	4	3	4	4	3	3	4	3	1	4	1	4	4	4	4	4	4	1	4	4	1	4	3	4	4	2	3	3	3	3	1
2	2	35	1	1	10	6	4	4	1	1	4	4	4	4	4	4	3	3	2	4	4	1	4	1	4	4	4	4	3	4	4	4	4	4	4	1	4	4	2	4	1	4	3	1	1	2	4	4	1
2	1	27	4	2	15	11	3	4	4	3	4	3	3	3	4	4	4	2	2	2	3	3	3	3	2	4	1	2	2	2	3	1	4	4	3	3	4	3	4	4	1	4	2	4	2	3	5	2	1
2	2	36	4	1	12	8	4	4	4	3	4	4	3	3	4	3	4	3	3	3	4	3	3	2	4	4	4	3	2	3	4	4	4	4	3	3	2	4	4	4	1	4	2	2	4	3	4	1	1
2	1	36	4	1	10	5	4	4	1	4	4	3	4	4	4	2	3	2	2	2	3	2	2	2	3	2	4	4	3	4	3	4	3	3	3	2	2	4	2	4	4	1	3	2	4	3	4	4	1
2	2	51	4	1	9	10	4	4	1	1	4	4	4	4	4	3	3	3	3	4	4	4	4	1	4	4	4	4	1	4	4	4	3	3	4	3	4	4	1	4	1	4	4	2	2	3	4	4	1
2	1	37	3	1	12	7	4	4	1	2	3	4	4	4	4	4	3	3	3	3	4	4	3	2	4	3	3	4	2	4	4	4	4	4	3	2	2	4	2	4	2	4	4	2	3	3	3	3	1
2	2	28	3	1	8	1	3	3	2	2	3	3	3	0	3	4	3	3	3	4	3	3	3	3	3	3	3	3	2	3	0	3	4	3	3	3	2	3	2	4	1	3	4	2	3	2	2	1	1
2	2	27	3	1	10	1	4	3	2	3	3	3	3	3	3	3	3	2	3	3	3	3	2	3	3	3	4	3	2	3	0	3	4	3	3	3	2	3	3	4	1	3	3	1	3	3	4	5	1
2	2	30	1	1	9	3	4	3	1	2	3	3	3	4	4	4	4	3	3	3	4	4	3	2	3	3	2	4	2	3	4	4	3	3	3	1	2	3	3	4	1	4	3	2	2	4	4	5	1
2	2	48	3	1	8	3	3	3	1	1	3	3	4	4	4	4	3	3	3	3	4	3	3	2	3	3	2	4	2	3	3	3	3	3	3	2	2	3	3	3	1	3	3	2	2	2	4	1	1
2	2	45	4	1	14	8	4	4	1	1	4	4	4	4	4	4	4	3	4	4	4	4	4	1	4	4	4	4	2	4	3	3	4	3	3	4	4	4	2	3	1	3	4	2	3	2	4	1	1
2	1	47	3	2	9	23	3	3	2	2	3	3	3	4	4	4	3	3	3	3	4	4	3	2	3	3	2	2	2	3	3	3	3	3	3	3	1	3	2	3	1	3	2	2	2	4	3	1	1
2	1	34	3	1	12	5	3	3	2	2	3	3	3	3	2	4	3	4	4	4	4	3	3	2	3	3	3	3	2	3	0	3	4	3	3	3	1	3	3	4	1	3	3	2	2	4	4	1	1
2	2	26	1	1	10	1	3	3	2	2	3	3	3	0	4	4	4	2	2	2	4	3	3	2	3	3	3	3	2	3	0	3	3	3	3	2	2	3	2	3	1	3	4	2	2	3	3	1	1
2	1	29	3	1	12	7	3	3	2	2	3	3	3	4	4	3	4	2	3	3	4	3	3	2	3	3	3	3	2	3	0	3	3	3	3	3	1	3	2	4	1	2	3	2	3	3	3	1	1
2	1	32	3	1	10	7	3	3	2	2	3	3	3	4	3	4	3	2	2	3	4	3	3	2	3	3	2	3	2	3	0	3	3	3	3	2	1	3	3	4	1	3	3	2	2	3	4	1	1
2	1	32	4	1	10	7	3	3	2	2	3	3	3	4	4	3	3	3	3	4	4	4	4	3	3	4	4	3	2	3	0	3	3	3	3	2	1	3	2	3	1	4	3	2	2	2	4	1	1
2	1	48	3	1	10	23	3	3	2	2	3	3	3	4	4	3	4	3	3	3	4	3	3	2	3	3	3	3	2	3	0	3	3	3	3	3	1	3	2	3	1	3	3	1	2	3	4	1	1
2	2	38	3	1	9	1	3	3	2	2	3	3	4	4	3	4	3	3	3	3	4	3	3	2	3	3	2	1	1	3	1	3	3	3	3	3	1	3	3	3	1	3	3	2	2	4	4	1	1
2	2	37	3	1	12	2	4	4	2	4	4	4	4	4	4	4	4	4	3	3	3	4	3	1	3	3	4	4	1	4	3	3	4	3	3	2	4	4	2	4	1	4	3	2	2	2	4	5	1
2	1	55	1	1	9	25	3	3	1	2	3	3	3	4	4	4	4	3	3	3	4	4	3	2	3	3	2	3	2	3	3	3	4	3	3	2	1	3	2	3	1	3	3	2	3	4	4	5	1
2	2	37	4	1	18	8	4	4	1	2	3	4	3	4	4	4	4	3	3	3	4	4	3	1	3	3	3	3	1	3	3	3	3	3	3	2	3	3	4	4	1	3	3	3	2	3	4	5	1
2	2	29	1	1	10	3	4	3	1	3	3	3	3	4	4	4	4	4	4	4	4	4	3	2	3	3	4	3	2	3	3	3	3	3	3	1	3	3	3	3	1	4	3	2	2	3	4	1	1
2	2	35	1	1	10	3	4	4	1	2	3	3	3	4	4	4	3	3	3	3	4	4	3	1	3	3	2	3	2	3	3	3	3	3	3	1	4	3	3	4	1	3	3	2	2	2	4	4	1
2	2	37	3	1	9	9	3	4	4	4	4	4	4	4	4	4	4	3	3	3	4	4	4	1	3	3	4	4	1	4	4	4	4	3	3	3	3	3	1	4	1	2	3	2	3	2	4	5	1
2	1	40	3	1	12	7	4	4	1	1	3	4	4	4	4	4	4	3	3	3	4	4	3	1	3	3	4	3	2	3	3	3	3	3	3	3	2	3	2	4	1	3	3	2	2	3	4	1	1
2	1	43	4	1	15	7	4	4	1	2	1	4	4	4	4	4	3	2	2	2	4	4	2	2	3	3	1	4	1	4	0	4	4	3	3	3	1	4	2	4	2	3	3	2	3	4	4	1	1
2	1	40	1	1	10	22	4	4	1	2	4	4	4	4	4	4	3	4	3	3	4	4	3	2	3	4	2	3	2	3	3	3	4	3	3	2	1	3	3	3	1	4	4	1	2	3	4	1	1
2	1	55	4	2	15	24	4	4	1	1	4	4	4	4	4	4	4	4	4	4	4	4	4	1	3	3	4	3	1	4	4	4	4	3	3	1	1	4	3	4	1	3	3	2	3	2	4	1	1
2	1	48	4	1	10	22	3	3	1	2	3	4	3	4	4	4	4	4	4	4	4	3	3	1	3	3	3	3	1	3	3	3	3	3	3	2	3	3	3	3	1	3	3	2	2	4	4	5	1
2	1	44	4	1	12	7	3	3	1	2	3	3	3	4	4	4	3	3	3	3	4	4	3	1	3	3	3	3	2	4	3	3	3	3	3	2	1	3	3	3	1	3	3	1	3	3	4	1	1
2	2	30	3	1	10	7	3	3	2	2	3	3	3	3	3	4	3	3	3	3	4	3	3	2	3	3	3	1	2	3	3	3	3	3	3	3	2	3	2	3	1	3	3	1	3	4	4	1	1
2	2	30	3	1	8	1	3	3	2	2	3	3	3	0	2	3	3	2	2	3	4	3	2	2	3	2	3	1	2	3	3	3	3	3	3	3	2	3	3	3	1	3	2	2	2	4	4	5	1
2	1	33	3	1	10	7	3	3	2	2	3	3	3	2	3	3	3	2	2	2	4	3	3	2	3	3	2	2	2	3	0	3	3	3	3	2	1	3	2	3	1	2	3	2	2	4	4	5	1
2	2	40	1	1	8	1	3	3	2	2	3	3	3	0	2	4	3	2	2	3	4	3	3	2	3	3	3	2	2	3	0	3	3	3	3	3	2	3	3	3	1	2	2	4	3	4	2	5	1
2	1	49	3	1	10	22	3	3	2	2	3	3	3	4	4	3	3	3	2	3	4	3	3	2	3	3	2	3	2	3	0	3	3	3	3	3	1	3	3	3	1	3	3	2	2	4	4	1	1
2	2	25	1	1	8	1	3	3	2	2	3	3	3	3	3	4	4	4	3	2	4	3	3	2	3	3	3	3	2	3	0	3	3	3	2	3	1	3	3	3	1	4	3	3	3	4	4	1	1
2	2	25	3	1	8	1	3	3	2	2	3	3	3	2	3	3	4	2	2	2	4	3	3	2	3	3	2	2	2	3	0	3	3	3	3	2	1	3	3	3	1	3	2	2	1	4	4	3	1
2	1	48	3	1	9	27	3	3	2	2	3	3	3	3	3	3	2	3	3	4	4	2	3	2	3	3	3	3	2	3	3	3	3	3	3	3	1	3	2	3	2	3	3	2	2	3	4	5	1
2	2	21	1	1	8	1	3	3	2	2	3	3	3	3	4	4	4	2	2	3	3	3	3	2	3	3	3	3	2	3	0	3	3	3	3	2	2	3	2	3	2	3	2	3	2	4	2	5	1
2	2	26	3	1	8	1	3	3	2	3	3	3	3	2	4	4	2	2	2	3	4	3	3	3	3	3	3	3	2	3	0	3	3	3	3	2	1	3	2	3	2	2	2	1	2	6	4	1	1
2	2	34	1	1	10	8	4	4	2	2	3	4	4	4	4	4	4	3	3	3	4	3	3	2	3	3	3	3	2	3	3	3	4	3	3	2	3	4	3	3	1	4	3	2	2	3	4	1	1
2	2	44	4	2	8	3	3	3	1	3	3	4	3	4	4	4	3	3	3	3	4	4	3	2	3	3	3	3	2	3	3	3	3	3	3	3	3	3	2	3	1	3	3	2	2	3	4	5	1
2	2	28	3	1	10	1	3	3	2	2	3	3	3	0	2	4	3	3	2	4	3	3	3	2	3	3	3	3	2	3	0	3	3	3	3	2	1	3	3	3	1	4	3	2	3	4	4	1	1
2	2	37	3	1	9	1	4	4	1	2	3	4	4	1	1	1	3	3	3	3	4	4	4	2	3	4	3	3	2	3	3	3	4	3	3	2	2	3	2	4	1	4	3	3	2	3	3	1	1
2	1	34	3	1	15	5	4	3	2	2	3	3	4	4	4	4	4	3	3	3	3	4	3	2	3	3	4	3	2	3	3	3	3	3	3	3	1	3	2	4	1	2	2	2	2	3	1	1	1
2	1	43	4	1	15	24	3	3	1	2	3	3	3	4	4	4	3	3	3	3	3	3	3	2	3	3	3	3	1	3	3	3	3	3	3	3	1	3	3	4	1	4	2	3	2	3	4	1	1
2	2	46	4	2	12	24	3	3	2	2	3	3	3	4	4	4	3	3	3	3	4	2	3	2	3	4	2	3	2	3	3	3	3	3	3	2	1	3	3	3	2	2	2	3	2	3	4	5	1
2	2	45	4	1	15	8	4	3	3	3	2	1	4	3	4	3	3	3	3	3	4	3	2	2	3	3	4	2	2	3	3	4	3	3	3	3	1	3	3	1	2	3	3	4	5	2	1	5	1
2	2	36	8	2	10	7	3	3	2	2	3	3	3	3	3	4	4	3	3	4	4	3	4	2	3	4	2	2	1	3	3	3	3	3	3	3	1	3	2	3	1	4	2	1	2	2	4	5	1
2	2	37	3	1	10	8	4	3	3	4	3	4	4	4	4	4	3	3	4	3	4	4	4	2	3	3	4	4	2	4	3	4	4	4	3	2	2	4	3	4	2	3	4	2	2	3	4	5	1
2	1	37	4	1	12	22	4	4	2	2	2	4	4	4	2	4	4	3	3	3	4	4	2	1	3	3	4	3	2	3	3	3	4	3	3	2	1	3	3	2	3	4	3	2	2	3	4	1	1
2	1	44	3	1	12	23	4	4	1	1	4	3	4	4	4	4	4	4	4	4	4	4	4	1	3	4	2	3	2	4	3	4	4	3	3	2	2	3	3	4	1	4	3	1	2	3	4	1	1
2	2	41	4	2	8	8	3	4	3	2	4	3	4	4	3	4	3	2	3	3	4	4	4	2	4	3	2	3	2	3	3	4	4	3	4	3	1	3	3	3	2	2	2	2	2	2	4	5	1
2	2	30	3	1	8	8	4	4	1	2	3	4	4	4	4	4	4	4	4	4	4	4	3	2	3	3	2	3	2	4	3	3	4	3	3	2	4	3	2	4	3	3	3	2	2	3	4	2	1
2	2	46	4	1	10	9	3	4	2	3	3	4	4	4	1	4	3	3	3	3	4	4	3	1	3	3	3	3	2	3	3	3	3	3	3	2	2	3	3	3	2	3	3	2	2	3	4	5	1
2	2	35	3	1	10	8	4	4	1	2	4	4	4	4	3	4	4	4	4	4	4	4	3	1	3	4	4	4	2	4	3	4	4	4	3	4	2	4	3	4	1	4	3	1	1	2	4	1	1
2	1	52	4	1	15	22	3	3	2	3	3	3	3	3	3	4	3	3	2	2	2	4	2	2	3	3	2	3	2	4	3	3	4	3	3	2	2	4	3	4	1	3	3	2	2	4	4	1	1
2	1	24	1	1	10	0	4	4	3	2	4	4	4	4	4	4	4	4	4	4	4	4	4	2	4	4	4	1	1	1	4	4	4	4	4	2	2	4	2	4	1	4	2	2	1	4	4	1	1
[truncated: 41 more columns]

## Sheet: Codebook
var name	coding	Re-coding notes for scale construction	description
Age	numeric		age
QA5	1=intervention, 2=control		intervention vs control arm
QA6	1=AWW; 2=ASHA		FLHW Type
Q105	1=scheduled caste, 2=scheduled tribe, 3=other backward class, 4=general caste, 8=other		caste
Q106	1= currently married, 2=widowed, 3=divorced, 4=separated, 5=never married		marital status
Q108	numeric		highest level of education (years)
Q110_YEAR	numeric		length of service (years)
Q115	1= strongly disagree, 2=disagree, 3=agree, 4=strongly agree		Teamwork
Q116	1= strongly disagree, 2=disagree, 3=agree, 4=strongly agree		Teamwork
Q117	1= strongly disagree, 2=disagree, 3=agree, 4=strongly agree	Reverse coded item	Teamwork
Q118	1= strongly disagree, 2=disagree, 3=agree, 4=strongly agree	Reverse coded item	Teamwork
Q119	1= strongly disagree, 2=disagree, 3=agree, 4=strongly agree		Teamwork
Q120	1= strongly disagree, 2=disagree, 3=agree, 4=strongly agree		Teamwork
Q121	1= strongly disagree, 2=disagree, 3=agree, 4=strongly agree		Teamwork
Q122	1=not at all confident, 2=not very confident, 3=somewhat confident, 4=completely confident		Empowerment
Q123	1=not at all confident, 2=not very confident, 3=somewhat confident, 4=completely confident		Empowerment
Q124	1=not at all confident, 2=not very confident, 3=somewhat confident, 4=completely confident		Empowerment
Q125	1=not at all confident, 2=not very confident, 3=somewhat confident, 4=completely confident		Empowerment
Q126	1=not at all confident, 2=not very confident, 3=somewhat confident, 4=completely confident		Empowerment
Q127	1=not at all confident, 2=not very confident, 3=somewhat confident, 4=completely confident		Empowerment
Q128	1=not at all confident, 2=not very confident, 3=somewhat confident, 4=completely confident		Empowerment
Q129	1=not at all confident, 2=not very confident, 3=somewhat confident, 4=completely confident		Empowerment
Q130	1= strongly disagree, 2=disagree, 3=agree, 4=strongly agree		Job satisfaction & attachment
Q131	1= strongly disagree, 2=disagree, 3=agree, 4=strongly agree		Job satisfaction & attachment
Q132	1= strongly disagree, 2=disagree, 3=agree, 4=strongly agree	Reverse coded item	Job satisfaction & attachment
Q133	1= strongly disagree, 2=disagree, 3=agree, 4=strongly agree		Job satisfaction & attachment
Q134	1= strongly disagree, 2=disagree, 3=agree, 4=strongly agree		Job satisfaction & attachment
Q135	1= strongly disagree, 2=disagree, 3=agree, 4=strongly agree	Reverse coded item	Job satisfaction & attachment
Q136	1= strongly disagree, 2=disagree, 3=agree, 4=strongly agree		Job satisfaction & attachment
Q137	1= strongly disagree, 2=disagree, 3=agree, 4=strongly agree	Reverse coded item	Job satisfaction & attachment
Q138	1= strongly disagree, 2=disagree, 3=agree, 4=strongly agree		Job satisfaction & attachment
Q139	1= strongly disagree, 2=disagree, 3=agree, 4=strongly agree		Job satisfaction & attachment
Q140	1= strongly disagree, 2=disagree, 3=agree, 4=strongly agree		Job satisfaction & attachment
Q141	1= strongly disagree, 2=disagree, 3=agree, 4=strongly agree		Appreciation, support & recognition
Q142	1= strongly disagree, 2=disagree, 3=agree, 4=strongly agree		Appreciation, support & recognition
Q143	1= strongly disagree, 2=disagree, 3=agree, 4=strongly agree		Appreciation, support & recognition
Q144	1= strongly disagree, 2=disagree, 3=agree, 4=strongly agree	Reverse coded item	Appreciation, support & recognition
Q146	1= strongly disagree, 2=disagree, 3=agree, 4=strongly agree		Appreciation, support & recognition
Q147	1= strongly disagree, 2=disagree, 3=agree, 4=strongly agree	Reverse coded item	Appreciation, support & recognition
Q148	1= strongly disagree, 2=disagree, 3=agree, 4=strongly agree		Appreciation, support & recognition
Q145	1=strongly disagree, 2=disagree, 3=agree, 4=strongly agree		Receive regular payment
Q149	1=never, 2=rarely, 3=often, 4=always	0=Always and Often; 1=Rarely; 2=Never	Evidence of teamwork: Colleagues hide information
Q150	1=never, 2=rarely, 3=often, 4=always	0=Never and Rarely; 1=Often; 2=Always	Evidence of teamwork: Colleagues help each other
Q151	1=never, 2=rarely, 3=often, 4=always	0=Never and Rarely; 1=Often; 2=Always	Evidence of teamwork: Colleagues help problem solve
Q152	1=every day, 2=once a week, 3=once in a fortnight, 4=once a month, 5=rarely, 6=never	0=Never and Rarely; 1=Once in a month and fortnight; 2=Once in week and Every day	Evidence of teamwork: Frequency of interaction
Q153	1=every day, 2=once a week, 3=once in a fortnight, 4=once a month, 5=rarely, 6=never	0=Never and Rarely; 1=Once in a month and fortnight; 2=Once in week and Every day	Evidence of teamwork: Frequency of interaction
Q154	1=every day, 2=once a week, 3=once in a fortnight, 4=once a month, 5=rarely, 6=never	0=Never and Rarely; 1=Once in a month and fortnight; 2=Once in week and Every day	Evidence of teamwork: Frequency of interaction
Q155	1=last month, 2=last fortnight, 3=last week, 4=this week, 5=never	0=Never; 1=Last fortnight and Last month; 2=This week and Last week	Evidence of teamwork: Frequency of joint home visits
Q156	1=last month, 2=last fortnight, 3=last week, 4=this week, 5=never	0=Never; 1=Last fortnight and Last month; 2=This week and Last week	Evidence of teamwork: Frequency of joint home visits
Q157	1=every month, 2=sometimes, 3=almost never	Reverse coded item	Evidence of teamwork: Frequency of meetings attended
Q158	1=every month, 2=sometimes, 3=almost never	Reverse coded item	Evidence of teamwork: Frequency of meetings attended
Q159	1=always, 2=often, 3=rarely, 4=never, 5=not applicable	Reverse coded item	Provide equitable services
Q160	1=always, 2=often, 3=rarely, 4=never, 5=not applicable	Reverse coded item	Provide equitable services
Q163	1=never, 2=rarely, 3=often, 4=always	0=Never and Rarely; 1=Often; 2=Always	Take initiative & problem solve
Q164	1=never, 2=rarely, 3=often, 4=always	0=Never and Rarely; 1=Often; 2=Always	Take initiative & problem solve
Q165	1=never, 2=rarely, 3=often, 4=always	0=Never and Rarely; 1=Often; 2=Always	Take initiative & problem solve
Q166	1=never, 2=rarely, 3=often, 4=always	0=Never and Rarely; 1=Often; 2=Always	Take initiative & problem solve
Q167	1=never, 2=rarely, 3=often, 4=always		Perceived value of HSC meetings
Q168	1=never, 2=rarely, 3=often, 4=always	Reverse coded item	Perceived value of HSC meetings
Q169	1=never, 2=rarely, 3=often, 4=always		Perceived value of HSC meetings
Q170	1=never, 2=rarely, 3=often, 4=always	Reverse coded item	Perceived value of HSC meetings
Q171	1=never, 2=rarely, 3=often, 4=always		Perceived value of HSC meetings
Q172	1=yes, 2=no	Reverse coded item	Evidence of supportive supervision: Fulfillment of supervisory duties
Q173	1=yes, 2=no	Reverse coded item	Evidence of supportive supervision: Fulfillment of supervisory duties
Q174	1=yes, 2=no	Reverse coded item	Evidence of supportive supervision: Fulfillment of supervisory duties
Q175	1=yes, 2=no	Reverse coded item	Evidence of supportive supervision: Fulfillment of supervisory duties
Q176	1=strongly disagree, 2=disagree, 3=agree, 4=strongly agree		Perceived responsibility of supervisor
Q177	1=strongly disagree, 2=disagree, 3=agree, 4=strongly agree		Perceived responsibility of supervisor
Q178	1=strongly disagree, 2=disagree, 3=agree, 4=strongly agree		Perceived responsibility of supervisor
Q179	1=strongly disagree, 2=disagree, 3=agree, 4=strongly agree		Perceived responsibility of supervisor
Q180	1=strongly disagree, 2=disagree, 3=agree, 4=strongly agree		Perceived responsibility of supervisor
Q181	1=strongly disagree, 2=disagree, 3=agree, 4=strongly agree		Perceived responsibility of supervisor
Q182	1=stay at home and don't show up for work, 2=ask another ANM or ASHA of your group for help with your work, 3=ask the ANM for advice on what to do	0=stay at home and don't show up for work; 1=ask the ANM for advice on what to do; 2=ask another ANM or ASHA of your group for help with your work	Scenario: Child gets sick, can't work
Q183	1= you would visit the women with newborns within first week of birth, 2=you would visit the pregnant women about to deliver soon, 3=you would visit the house of those you can reach most easily, 4= you would visit the women who are most likely to listen to you, 5= you would visit the women who you have a good relationship with, 6=you would visit those women who you know haven't been visited by an…	0=you would visit the house of those you can reach most easily & you would visit the women who are most likely to listen to you & you would visit the women who you have a good relationship with; 1=you would visit those women who you know haven't been visited by another ASHA or AWW in the last month & you would visit those women who you know haven't been using services & other; 2= you would visit …	Scenario: Busy month, need to prioritize home visits
Q184	1=finish your counseling and leave, you gave the information there is nothing else you can do; 2=go back to the house when you know the mater-in-law is not there; 3=bring another FLW or the ANM with you to the next visit to talk to the mother-in-law, 4=leave behind information and your number for the mother in case she has a question, 5=you talk to her husband and convince his mother; 8=other.	0=finish your counseling and leave, you gave the information there is nothing else you can do & go back to the house when you know the mater-in-law is not there; 1=leave behind information and your number for the mother in case she has a question & you talk to her husband and convince his mother & other; 2=bring another FLW or the ANM with you to the next visit to talk to the mother-in-law	Scenario: Complimentary feeding counsel, mother-in-law disagrees
Q185	1= leave there is nothing you can do, 2= go back to the house after some time to try again, 3=bring another ASHA/AWW or the ANM with you to the next visit for support in convincing the woman to listen, 4=leave behind information and your number in case the woman changes her mind or has questions, 5=talk to the husband or mother-in-law first; 8=other.	0=leave there is nothing you can do; 1=go back to the house after some time to try again & leave behind information and your number in case the woman changes her mind or has questions & talk to the husband or mother-in-law first & other; 2=bring another ASHA/AWW or the ANM with you to the next visit for support in convincing the woman to listen	Scenario: Immunization counsel, mother refuses to listen
Q186	1=nothing supply of tablets are out of your control, 2= talk to your ANM to see if she can help or have suggestions, 3= report it to the Block level officials, 4=ask the beneficiary to buy IFA, 8=other.	0=nothing supply of tablets are out of your control; 1=report it to the Block level officials & ask the beneficiary to buy IFA & other; 2=talk to your ANM to see if she can help or have suggestions	Scenario: Stock-out of IFA tablets
Q187	1= you can't do anything because you can't come back, 2= you will inform your group member and request them to help her out, 3= you will tell that woman to visit the nearest government hospital, 4=you will tell that woman to visit nearest private hospital, 5=you will arrange untrained provider to visit her, 6=you will provide name and contact number of health provider and ask her to visit; 8=othe…	0=you can't do anything because you can't come back & you will tell that woman to visit nearest private hospital & you will arrange untrained provider to visit her; 1=you will tell that woman to visit the nearest government hospital & you will provide name and contact number of health provider and ask her to visit & other; 2= you will inform your group member and request them to help her out	Scenario: Pregnant mother in critical condition while away at relatives
Q188	1=Fixed target for various indicators; 2=Working together; 3= Regular monthly meeting; 4=Regular review of achievement		Most important process that had made their job easier
Q190	1=Fixed target for various indicators; 2=Team work; 3=Non-cash incentives; 4=Certificates given by the senior government officials; 5=Regular review of work at HSC Meeting		Most important factor affecting their motivation
Q195	1=yes, 2=no		Would continue to try and achieve the targets, even if the non-financial incentives were to stop
Q196A_We are working for better cause	1=yes, 2=no		If non-financial incentive were to stop, why would they continue to try to achieve the target
Q196B_This is my duty/responsibilities	1=yes, 2=no
Q196C_Incentive does not matter for me	1=yes, 2=no
Q196D_Team work	1=yes, 2=no
Q196X_OTHER	1=yes, 2=no
Q199A_Getting more respect because it works more than money	1=yes, 2=no		Impact of the non-financial incentives on their families
Q199B_It makes family happy	1=yes, 2=no
Q199C_Getting more help from family member to finish household chore	1=yes, 2=no
Q199D_Respect/value has increased for my work	1=yes, 2=no
Q199X_Other	1=yes, 2=no
